# Supplementary material for: Downregulation of A20 Expression Increases the Immune Response and Apoptosis and Reduces Virus Production in Cells Infected by the Human Respiratory Syncytial Virus
Source: MDPI journal article supplement (doi:10.3390/vaccines8010100), 2020-02-24
Supplement: s1 [file s1]

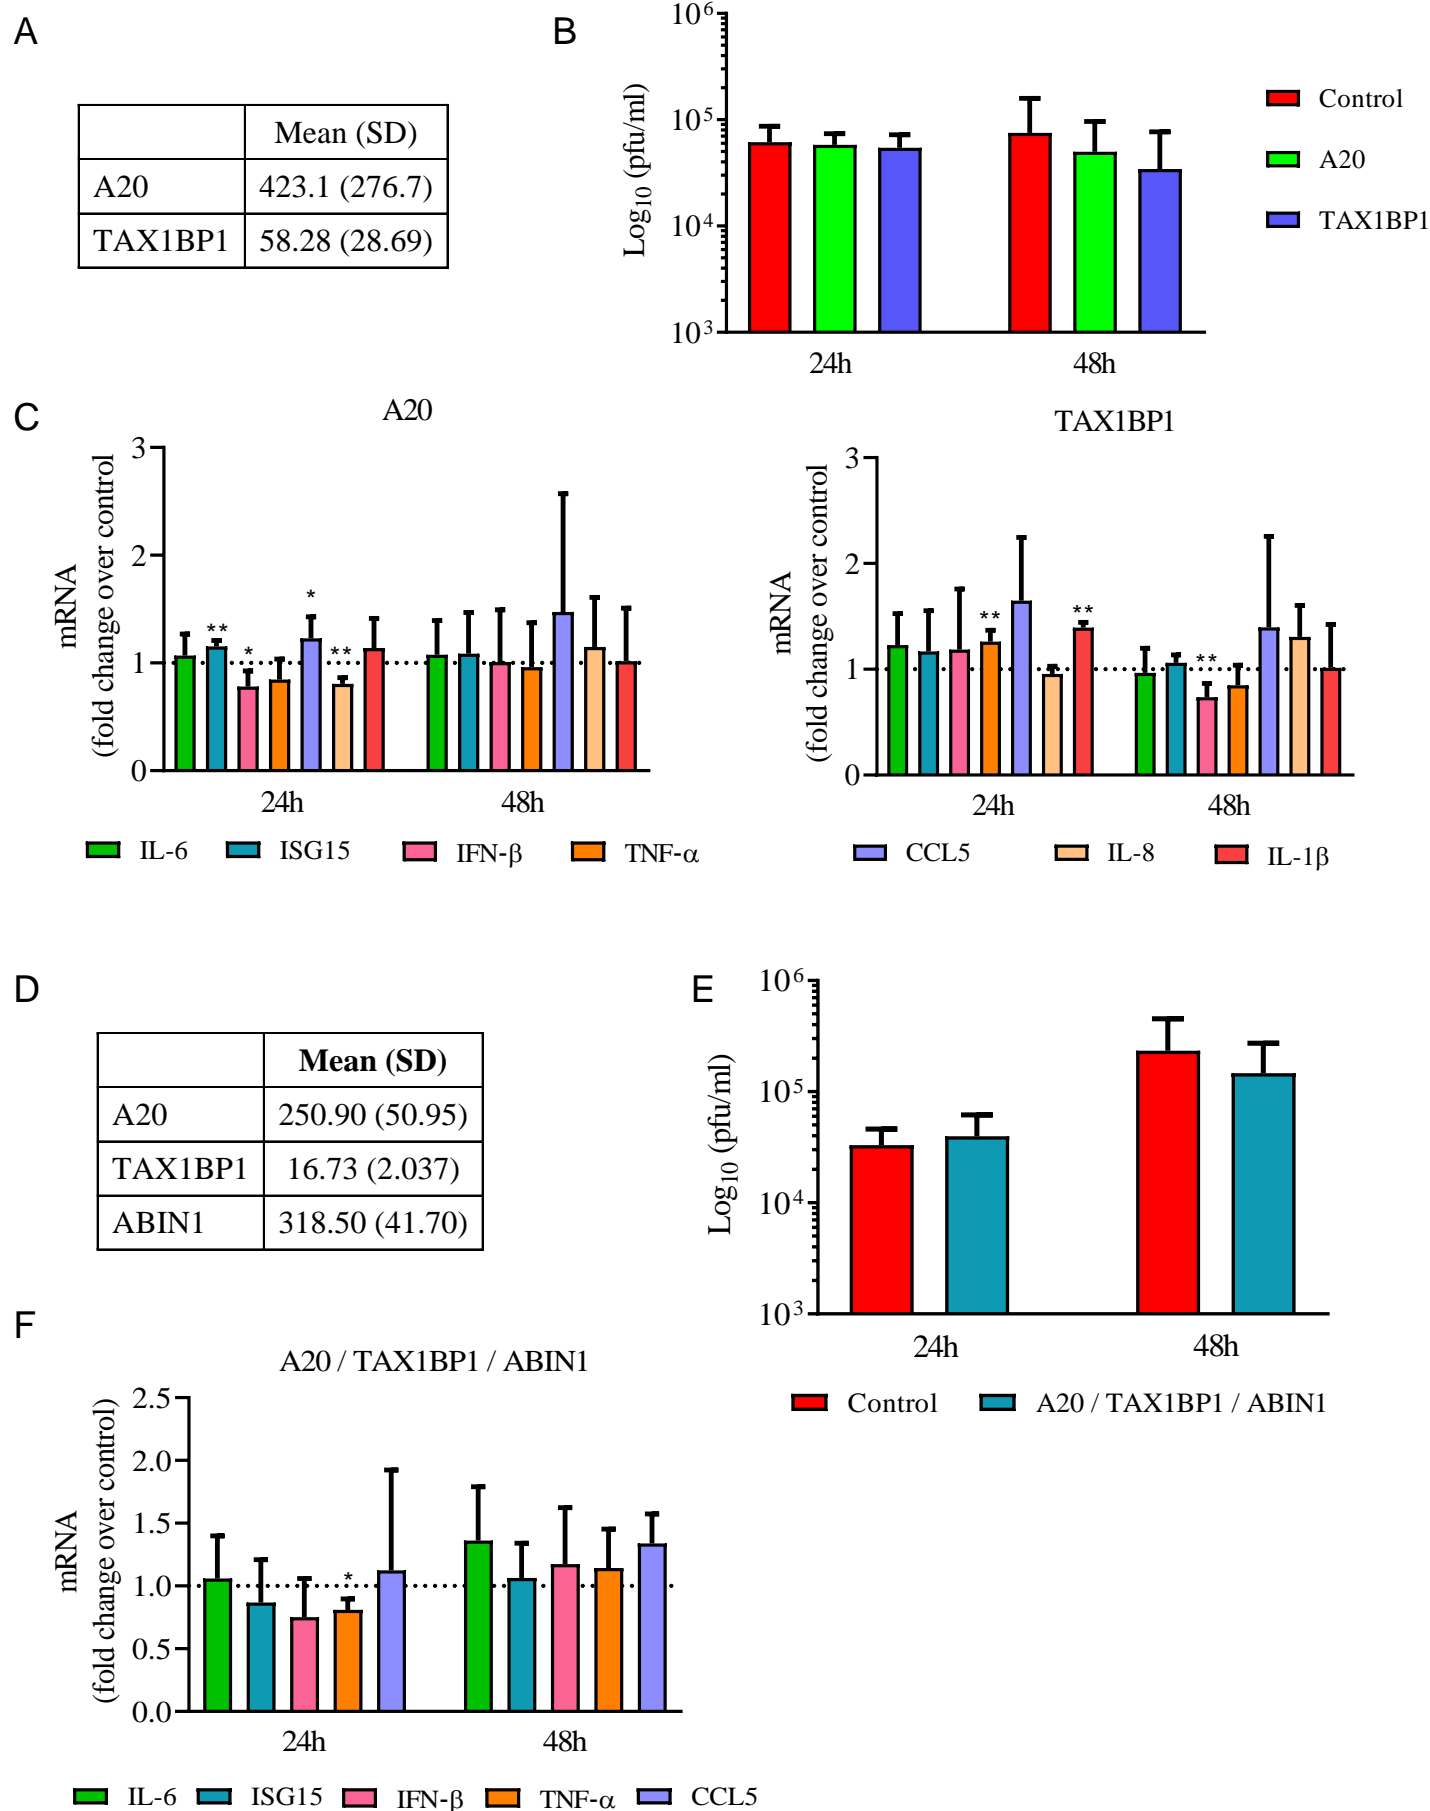

**Supplemental Fig. 5.** HRSV titers and immune gene expression in cells transfected with individual plasmids encoding A20 or TAX1BP1 (A-C) or with a mixture of plasmid encoding A20, TAX1BP1 and ABIN1 (D-F). Cells were transfected with the corresponding plasmids, infected 24h later with HRSV and harvested at 24 hpi (48 h post-transfection). Levels of the different mRNAs (A, C, D, F) were quantified by qRT-PCR and represented as fold-over mRNAs expressed in cells transfected with a control plasmid. Data are represented as the mean and standard deviation from three independent experiments. Comparisons between groups were done by using the t-test: \*,  $p < 0.05$  and \*\*,  $p < 0.01$ .
