# Supplementary material for: Downregulation of A20 Expression Increases the Immune Response and Apoptosis and Reduces Virus Production in Cells Infected by the Human Respiratory Syncytial Virus
Source: MDPI journal article supplement (doi:10.3390/vaccines8010100), 2020-02-24
Supplement: s1 [file s1]

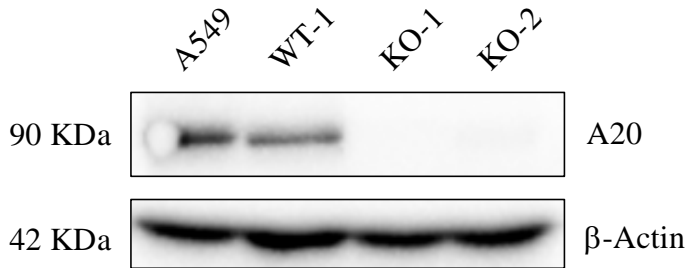

**Supplemental Fig. 1.** Two A20-knockout A549 cell lines (KO-1 and KO-2) were generated by using TALENs, and A20 expression was checked by Western blotting using specific antibodies. Uncloned wild-type cells (A549) and one wild-type cell clone (WT-1) were included as control.
