# Supplementary material for: Downregulation of A20 Expression Increases the Immune Response and Apoptosis and Reduces Virus Production in Cells Infected by the Human Respiratory Syncytial Virus
Source: MDPI journal article supplement (doi:10.3390/vaccines8010100), 2020-02-24
Supplement: s1 [file s1]

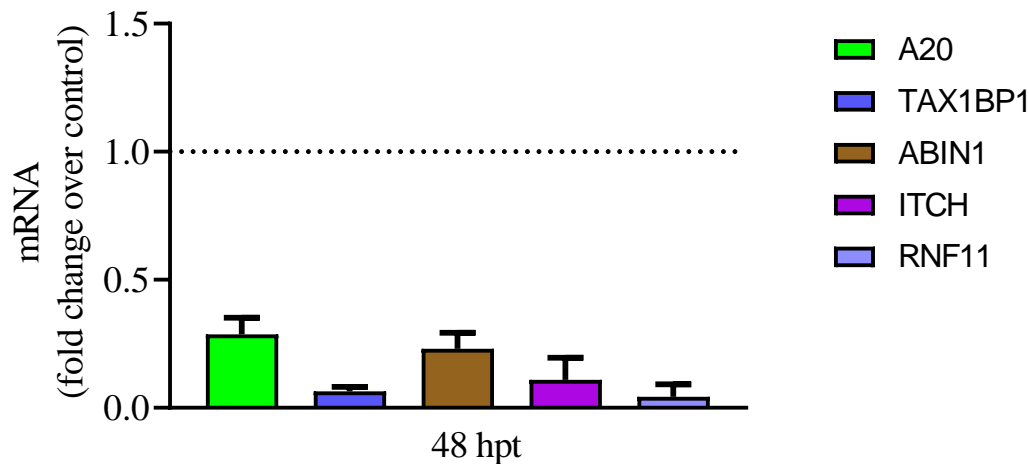

**Supplemental Fig. 3. Gene silencing of A20, TAX1BP1, ABIN1, ITCH and RNF11 genes.** Cells were transfected with the corresponding siRNAs (A20, TAX1BP1, ABIN1, ITCH or RNF11), infected with HRSV 24 h later and cells were harvested at 24 hpi (48 h post-transfection). Levels of the different mRNAs (A20, TAX1BP1, ABIN1, ITCH or RNF11) were quantified by qRT-PCR and represented as fold-over mRNAs expressed in cells transfected with a control siRNA. Data are represented as the mean and standard deviation from three independent experiments.
