# Supplementary material for: Downregulation of A20 Expression Increases the Immune Response and Apoptosis and Reduces Virus Production in Cells Infected by the Human Respiratory Syncytial Virus
Source: MDPI journal article supplement (doi:10.3390/vaccines8010100), 2020-02-24
Supplement: s1 [file s1]

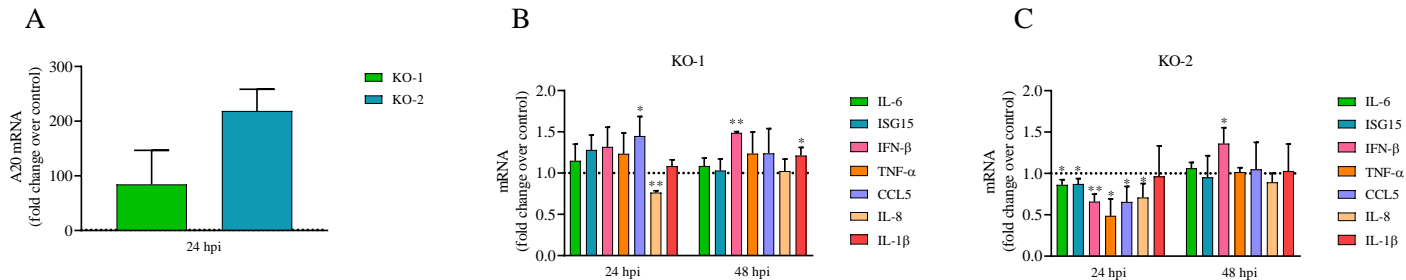

**Supplemental Fig. 4. Overexpression of A20 in KO lines.** KO-1 and KO-2 cells were transfected with a plasmid encoding A20, infected with HRSV 24 h later, and cells were harvested at 24 and 48 hpi. Levels of the different mRNAs were quantified by qRT-PCR and represented as fold-over mRNAs expressed in cells transfected with a control plasmid (empty vector). (A) mRNA levels of A20. (B) mRNA levels of IL-6, ISG15, IFN- $\beta$ , TNF- $\alpha$ , CCL5, IL-8 and IL-1 $\beta$  in KO-1 cells. (C) mRNA levels of IL-6, ISG15, IFN- $\beta$ , TNF- $\alpha$ , CCL5, IL-8 and IL-1 $\beta$  in KO-2 cells. Data are represented as the mean and standard deviation from three independent experiments. Comparisons between groups were done by using the t-test: \*,  $p < 0.05$  and \*\*,  $p < 0.01$ .
