# Supplementary material for: Downregulation of A20 Expression Increases the Immune Response and Apoptosis and Reduces Virus Production in Cells Infected by the Human Respiratory Syncytial Virus
Source: MDPI journal article supplement (doi:10.3390/vaccines8010100), 2020-02-24
Supplement: s1 [file s1]

## A549 (1)

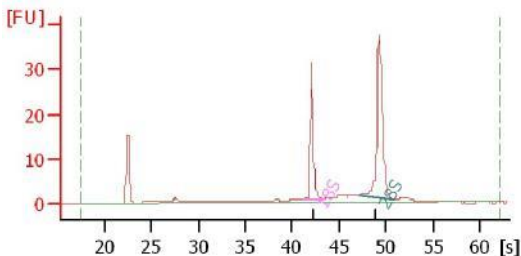

## Overall Results for sample:

A549 (1)

RNA Area: 120.3  
 RNA Concentration: 1,078 ng/μl  
 rRNA Ratio [28s / 18s]: 2.0  
 RNA Integrity Number (RIN): 9.7 (B.02.08)  
 Result Flagging:    
 Color:  
 Result Flagging Label: RIN: 9.70

## Fragment table for sample:

A549 (1)

| Name | Start Time (s) | End Time (s) | Area | % of total Area |
|------|----------------|--------------|------|-----------------|
| 18S  | 41.13          | 43.24        | 24.9 | 20.7            |
| 28S  | 47.12          | 50.85        | 50.9 | 42.3            |

## KO-1 (1)

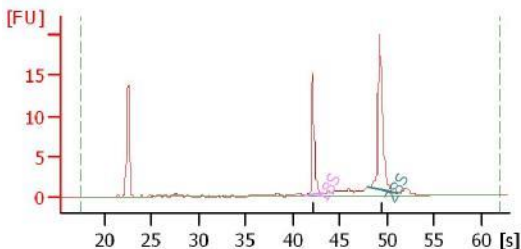

## Overall Results for sample:

KO-1 (1)

RNA Area: 55.8  
 RNA Concentration: 500 ng/μl  
 rRNA Ratio [28s / 18s]: 1.9  
 RNA Integrity Number (RIN): 10 (B.02.08)  
 Result Flagging:    
 Color:  
 Result Flagging Label: RIN:10

## Fragment table for sample:

KO-1 (1)

| Name | Start Time (s) | End Time (s) | Area | % of total Area |
|------|----------------|--------------|------|-----------------|
| 18S  | 41.27          | 43.29        | 11.1 | 19.9            |
| 28S  | 47.96          | 50.97        | 21.3 | 38.3            |

# KO-2 (1)

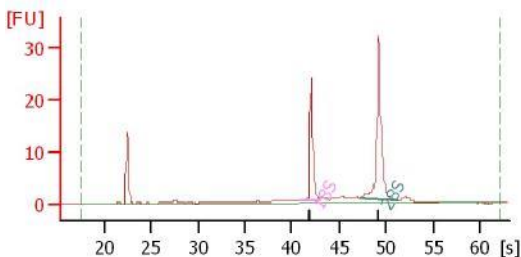

Overall Results for sample:

**KO-2 (1)**

RNA Area: 87.2  
 RNA Concentration: 782 ng/μl  
 rRNA Ratio [28s / 18s]: 2.1  
 RNA Integrity Number (RIN): 9.6 (B.02.08)  
 Result Flagging Color:

Result Flagging Label: RIN: 9.60

Fragment table for sample:

**KO-2 (1)**

| Name | Start Time (s) | End Time (s) | Area | % of total Area |
|------|----------------|--------------|------|-----------------|
| 18S  | 40.86          | 42.89        | 17.4 | 20.0            |
| 28S  | 47.12          | 51.26        | 36.6 | 42.0            |

# A549 (2)

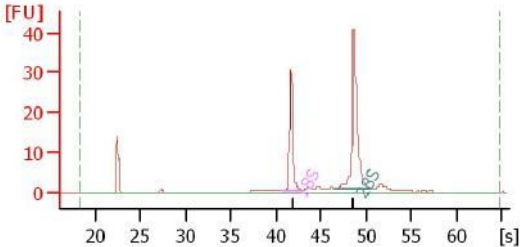

## Overall Results for sample:

**A549 (2)**

RNA Area: 111.4  
 RNA Concentration: 53 ng/ $\mu$ l  
 rRNA Ratio [28s / 18s]: 2.2  
 RNA Integrity Number (RIN): 10 (B.02.08)  
 Result Flagging Color:   
 Result Flagging:   
 Label: RIN:10

## Fragment table for sample:

**A549 (2)**

| Name | Start Time [s] | End Time [s] | Area | % of total Area |
|------|----------------|--------------|------|-----------------|
| 18S  | 40.77          | 42.93        | 25.1 | 22.5            |
| 28S  | 46.60          | 50.54        | 53.9 | 48.4            |

# KO-1 (2)

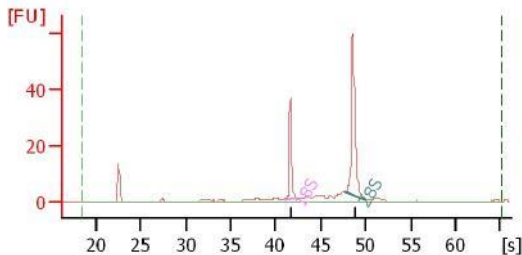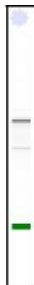

## Overall Results for sample:

KO-1 (2)

RNA Area: 140.2  
 RNA Concentration: 67 ng/ $\mu$ l  
 rRNA Ratio [28s / 18s]: 2.3  
 RNA Integrity Number (RIN): 9.6 (B.02.08)  
 Result Flagging Color:  
 Result Flagging Label: RIN: 9.60

## Fragment table for sample:

KO-1 (2)

Name Start Time (s) End Time (s) Area % of total Area

|     |       |       |      |      |
|-----|-------|-------|------|------|
| 18S | 40.93 | 42.26 | 26.2 | 18.7 |
| 28S | 47.69 | 50.06 | 59.9 | 42.7 |

## KO-2 (2)

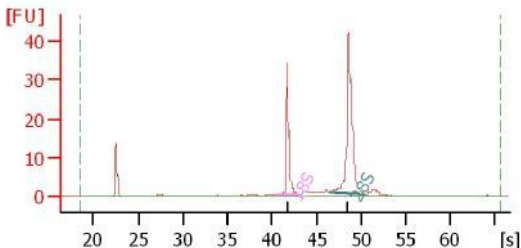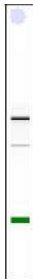

### Overall Results for sample:

**KO-2 (2)**

RNA Area: 114.6  
 RNA Concentration: 54 ng/ $\mu$ l  
 rRNA Ratio [28s / 18s]: 2.0  
 RNA Integrity Number (RIN): 10 (B.02.08)  
 Result Flagging Color:   
 Result Label: RIN:10

### Fragment table for sample:

**KO-2 (2)**

| Name | Start Time (s) | End Time (s) | Area | % of total Area |
|------|----------------|--------------|------|-----------------|
| 18S  | 40.62          | 43.10        | 27.5 | 24.0            |
| 28S  | 46.52          | 50.42        | 55.5 | 48.4            |

# A549 (3)

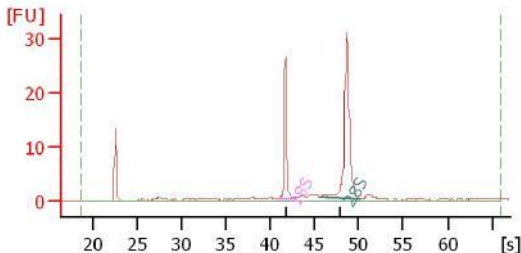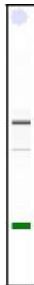

## Overall Results for sample:

**A549 (3)**

RNA Area: 86.9  
 RNA Concentration: 41 ng/ $\mu$ l  
 rRNA Ratio [28s / 18s]: 2.2  
 RNA Integrity Number (RIN): 10 (B.02.08)  
 Result Flagging:    
 Color:  
 Result Flagging Label: RIN:10

## Fragment table for sample:

**A549 (3)**

**Name Start Time (s) End Time (s) Area % of total Area**

|     |       |       |      |      |
|-----|-------|-------|------|------|
| 18S | 40.84 | 42.89 | 19.4 | 22.3 |
| 28S | 45.72 | 50.17 | 41.7 | 48.0 |

# KO-1 (3)

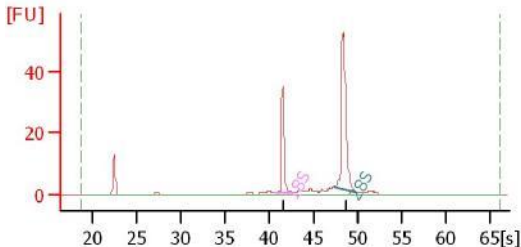

## Overall Results for sample:

KO-1 (3)

RNA Area: 118.1  
 RNA Concentration: 56 ng/ $\mu$ l  
 rRNA Ratio [28s / 18s]: 1.9  
 RNA Integrity Number (RIN): 10 (B.02.08)  
 Result Flagging   
 Color:  
 Result Flagging Label: RIN:10

## Fragment table for sample:

KO-1 (3)

| Name | Start Time (s) | End Time (s) | Area | % of total Area |
|------|----------------|--------------|------|-----------------|
| 18S  | 40.63          | 42.84        | 28.0 | 23.7            |
| 28S  | 47.40          | 50.13        | 54.4 | 46.0            |

# KO-2 (3)

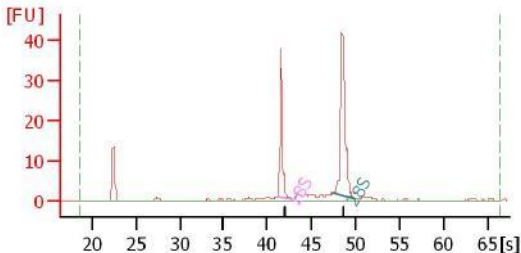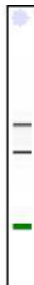

## Overall Results for sample:

KO-2 (3)

RNA Area: 111.4  
 RNA Concentration: 53 ng/μl  
 rRNA Ratio [28s / 18s]: 2.0  
 RNA Integrity Number (RIN): 10 (B.02.08)  
 Result Flagging: Result Flagging  
 Color: Color  
 Result Flagging Label: RIN:10

## Fragment table for sample:

KO-2 (3)

| Name | Start Time (s) | End Time (s) | Area | % of total Area |
|------|----------------|--------------|------|-----------------|
|------|----------------|--------------|------|-----------------|



|     |       |       |      |      |
|-----|-------|-------|------|------|
| 18S | 41.25 | 42.79 | 26.4 | 23.7 |
| 28S | 47.36 | 49.86 | 52.9 | 47.5 |
