# Supplementary material for: Downregulation of A20 Expression Increases the Immune Response and Apoptosis and Reduces Virus Production in Cells Infected by the Human Respiratory Syncytial Virus
Source: Vaccines (Basel). 2020 Feb 24;8(1):100. doi: 10.3390/vaccines8010100 (PMC7157707; doi:10.3390/vaccines8010100)
Supplement: Supplementary file 1 [file vaccines-08-00100-s001.zip]

Archive with 7 entries (7 files):
- Supplemental Fig. 1.pdf
- Supplemental Fig. 2.pdf
- Supplemental Fig. 3.pdf
- Supplemental Fig. 4.pdf
- Supplemental Fig. 5.pdf
- Supplemental File 1. List of genes upregulated in KO cells.xlsx
- Supplemental Tables.docx
