# Supplementary material for: Downregulation of A20 Expression Increases the Immune Response and Apoptosis and Reduces Virus Production in Cells Infected by the Human Respiratory Syncytial Virus
Source: Vaccines (Basel). 2020 Feb 24;8(1):100. doi: 10.3390/vaccines8010100 (PMC7157707; doi:10.3390/vaccines8010100)
Supplement: Supplementary file 1 [file vaccines-08-00100-s001.zip › Supplemental File 1. List of genes upregulated in KO cells.xlsx]

## Sheet: KO1 vs parental UP
test_id	gene_id	gene	locus	sample_1	sample_2	status	value_1	value_2	log2(fold_change)	test_stat	p_value	q_value	significant
CTD-2297D10.2	CTD-2297D10.2	CTD-2297D10.2	chr5:5132084-5140054	WT	KO1	OK	0	0.519671	inf	-nan	5e-05	0.00026409	yes
LRRN1	LRRN1	LRRN1	chr3:3799430-3849834	WT	KO1	OK	0	0.574048	inf	-nan	5e-05	0.00026409	yes
MT1B	MT1B	MT1B	chr16:56651898-56653204	WT	KO1	OK	0	0.847393	inf	-nan	5e-05	0.00026409	yes
PLPP4	PLPP4	PLPP4	chr10:120456953-120589864	WT	KO1	OK	0	1.48372	inf	-nan	5e-05	0.00026409	yes
POP3	POP3	POP3	chr1:158999970-159000312	WT	KO1	OK	0	4.88848	inf	-nan	5e-05	0.00026409	yes
TLR4	TLR4	TLR4	chr9:117704174-117717491	WT	KO1	OK	0.0275805	2.24542	6.34719	5.82227	5e-05	0.00026409	yes
WNT5A	WNT5A	WNT5A	chr3:55465714-55487642	WT	KO1	OK	0.0661222	3.96508	5.90607	9.53576	5e-05	0.00026409	yes
RUNX2	RUNX2	RUNX2	chr6:44826729-45551082	WT	KO1	OK	0.0717111	3.55238	5.63045	1.66653	5e-05	0.00026409	yes
TRIB2	TRIB2	TRIB2	chr2:12716871-12742732	WT	KO1	OK	0.155489	7.40202	5.57303	11.1225	5e-05	0.00026409	yes
FILIP1L	FILIP1L	FILIP1L	chr3:99816631-100178632	WT	KO1	OK	0.369689	17.5479	5.56884	5.87887	5e-05	0.00026409	yes
ANXA10	ANXA10	ANXA10	chr4:168092536-168187742	WT	KO1	OK	0.323872	14.5551	5.48996	9.33451	5e-05	0.00026409	yes
RASGRF2	RASGRF2	RASGRF2	chr5:80947692-81230162	WT	KO1	OK	0.103692	3.84932	5.21423	12.6731	5e-05	0.00026409	yes
CD74	CD74	CD74	chr5:150401636-150412936	WT	KO1	OK	5.01592	185.836	5.21137	19.8881	5e-05	0.00026409	yes
SPARC	SPARC	SPARC	chr5:151661095-151687907	WT	KO1	OK	0.466781	15.8747	5.08784	14.0261	5e-05	0.00026409	yes
ITGB3	ITGB3	ITGB3	chr17:47253841-47323901	WT	KO1	OK	0.309608	10.4093	5.07129	14.0509	5e-05	0.00026409	yes
DACT1	DACT1	DACT1	chr14:58634067-58648320	WT	KO1	OK	0.0719574	1.92501	4.74158	5.44016	5e-05	0.00026409	yes
ADAMTS6	ADAMTS6	ADAMTS6	chr5:65148735-65481920	WT	KO1	OK	0.0546058	1.37906	4.65849	8.02726	5e-05	0.00026409	yes
ITK	ITK	ITK	chr5:157180895-157255099	WT	KO1	OK	0.0584755	1.42307	4.60503	6.72294	5e-05	0.00026409	yes
CDH6	CDH6	CDH6	chr5:31193654-31329146	WT	KO1	OK	0.30479	7.09565	4.54105	15.0717	5e-05	0.00026409	yes
PIEZO2	PIEZO2	PIEZO2	chr18:10670246-11148762	WT	KO1	OK	0.110168	2.53499	4.52421	11.7081	5e-05	0.00026409	yes
PTPRE	PTPRE	PTPRE	chr10:127907060-128085855	WT	KO1	OK	0.470776	10.8218	4.52275	11.8238	5e-05	0.00026409	yes
SULT1C2	SULT1C2	SULT1C2	chr2:108288638-108309915	WT	KO1	OK	0.439466	9.81337	4.48092	12.1242	5e-05	0.00026409	yes
PID1	PID1	PID1	chr2:229023972-229271341	WT	KO1	OK	0.186316	3.91325	4.39254	7.86896	5e-05	0.00026409	yes
SLC1A3	SLC1A3	SLC1A3	chr5:36606354-36688334	WT	KO1	OK	1.6798	33.9972	4.33906	15.0655	5e-05	0.00026409	yes
GGT5	GGT5	GGT5	chr22:24219653-24245142	WT	KO1	OK	1.11586	21.6677	4.27932	13.3437	5e-05	0.00026409	yes
GRAMD3	GRAMD3	GRAMD3	chr5:126360095-126494161	WT	KO1	OK	1.04316	19.9906	4.2603	14.0123	5e-05	0.00026409	yes
IL7R	IL7R	IL7R	chr5:35856874-35879603	WT	KO1	OK	0.265383	4.95446	4.22258	10.5333	5e-05	0.00026409	yes
GLIPR1	GLIPR1	GLIPR1	chr12:75480732-75511638	WT	KO1	OK	4.12039	72.741	4.14192	10.1816	5e-05	0.00026409	yes
CFI	CFI	CFI	chr4:109740691-109802225	WT	KO1	OK	0.879226	14.676	4.06108	12.4677	5e-05	0.00026409	yes
CIITA	CIITA	CIITA	chr16:10877197-10924983	WT	KO1	OK	0.28068	4.4001	3.97054	9.15629	5e-05	0.00026409	yes
FSTL4	FSTL4	FSTL4	chr5:133196459-133612532	WT	KO1	OK	1.22414	18.7808	3.93941	15.0441	5e-05	0.00026409	yes
EDIL3	EDIL3	EDIL3	chr5:83940594-84384867	WT	KO1	OK	0.0467959	0.628868	3.7483	3.98058	5e-05	0.00026409	yes
CPE	CPE	CPE	chr4:165378941-165498547	WT	KO1	OK	1.15149	15.3705	3.73859	12.5695	5e-05	0.00026409	yes
PDCD1LG2	PDCD1LG2	PDCD1LG2	chr9:5510544-5571282	WT	KO1	OK	0.350902	4.63323	3.72288	8.61176	5e-05	0.00026409	yes
GBP1P1	GBP1P1	GBP1P1	chr1:89407678-89424934	WT	KO1	OK	1.15852	15.2239	3.71598	10.0312	5e-05	0.00026409	yes
POM121L9P	POM121L9P	POM121L9P	chr22:24251620-24265524	WT	KO1	OK	0.14183	1.85695	3.7107	8.36125	5e-05	0.00026409	yes
CNIH3	CNIH3	CNIH3	chr1:224434639-224740549	WT	KO1	OK	0.287064	3.64169	3.66516	5.01781	5e-05	0.00026409	yes
SPOCD1	SPOCD1	SPOCD1	chr1:31790421-31816051	WT	KO1	OK	0.609482	7.59446	3.63929	10.193	5e-05	0.00026409	yes
NR1H4	NR1H4	NR1H4	chr12:100473772-100563867	WT	KO1	OK	0.25031	2.90581	3.53716	5.20996	5e-05	0.00026409	yes
GBP1	GBP1	GBP1	chr1:89052303-89065360	WT	KO1	OK	23.742	273.893	3.5281	15.497	5e-05	0.00026409	yes
EFEMP1	EFEMP1	EFEMP1	chr2:55865961-55924163	WT	KO1	OK	1.06646	12.2638	3.5235	11.7616	5e-05	0.00026409	yes
FHOD3	FHOD3	FHOD3	chr18:36297695-37232127	WT	KO1	OK	1.31869	14.5484	3.46369	5.31154	5e-05	0.00026409	yes
FAM110B	FAM110B	FAM110B	chr8:57994553-58149718	WT	KO1	OK	0.153784	1.65115	3.42449	7.40042	5e-05	0.00026409	yes
OXCT1	OXCT1	OXCT1	chr5:41730064-41872236	WT	KO1	OK	0.187751	1.95363	3.37926	7.21248	5e-05	0.00026409	yes
PLA1A	PLA1A	PLA1A	chr3:119597847-119629811	WT	KO1	OK	6.60682	65.5521	3.31061	13.0999	5e-05	0.00026409	yes
KIAA2012	KIAA2012	KIAA2012	chr2:202073252-202205201	WT	KO1	OK	0.0785393	0.77747	3.3073	4.11951	5e-05	0.00026409	yes
ADAM19	ADAM19	ADAM19	chr5:157477303-157575823	WT	KO1	OK	4.32948	41.9108	3.27506	14.048	5e-05	0.00026409	yes
PPFIA4	PPFIA4	PPFIA4	chr1:203026520-203078736	WT	KO1	OK	0.150744	1.40153	3.21683	7.74296	5e-05	0.00026409	yes
LYPD1	LYPD1	LYPD1	chr2:132416573-132671579	WT	KO1	OK	1.57433	14.3474	3.18798	5.96094	5e-05	0.00026409	yes
ANXA8	ANXA8	ANXA8	chr10:47467993-47484158	WT	KO1	OK	1.09889	9.42756	3.10083	9.55232	5e-05	0.00026409	yes
GFRA2	GFRA2	GFRA2	chr8:21692017-21788834	WT	KO1	OK	0.0830651	0.696634	3.06809	3.52851	5e-05	0.00026409	yes
MAFB	MAFB	MAFB	chr20:40685847-40689240	WT	KO1	OK	0.15674	1.30725	3.06009	5.87105	5e-05	0.00026409	yes
TLR2	TLR2	TLR2	chr4:153684251-153706260	WT	KO1	OK	0.1254	1.03893	3.05048	4.34187	5e-05	0.00026409	yes
GUCY1B3	GUCY1B3	GUCY1B3	chr4:155758972-155807642	WT	KO1	OK	0.0764333	0.631689	3.04694	3.04256	5e-05	0.00026409	yes
ATOH8	ATOH8	ATOH8	chr2:85753785-85791383	WT	KO1	OK	0.381123	3.02902	2.99052	9.35287	5e-05	0.00026409	yes
EHF	EHF	EHF	chr11:34621040-34663287	WT	KO1	OK	2.14887	17.0631	2.98922	12.0762	5e-05	0.00026409	yes
C3	C3	C3	chr19:6677834-6720682	WT	KO1	OK	30.7417	242.368	2.97893	13.0577	5e-05	0.00026409	yes
LGALS17A	LGALS17A	LGALS17A	chr19:39679373-39686373	WT	KO1	OK	5.07169	39.8133	2.97271	10.5747	5e-05	0.00026409	yes
PRDM16	PRDM16	PRDM16	chr1:3069177-3438621	WT	KO1	OK	0.180724	1.41201	2.96588	7.99745	5e-05	0.00026409	yes
ZNF117	ZNF117	ZNF117	chr7:64974451-65006746	WT	KO1	OK	0.126405	0.982607	2.95856	4.70428	5e-05	0.00026409	yes
NTRK3	NTRK3	NTRK3	chr15:87876756-88271066	WT	KO1	OK	12.9313	99.8679	2.94915	12.6659	5e-05	0.00026409	yes
VCAM1	VCAM1	VCAM1	chr1:100719639-100739046	WT	KO1	OK	0.965252	7.44032	2.94639	9.64167	5e-05	0.00026409	yes
TXNIP	TXNIP	TXNIP	chr1:145992425-145996631	WT	KO1	OK	1.00269	7.69213	2.93951	9.48744	5e-05	0.00026409	yes
COL13A1	COL13A1	COL13A1	chr10:69801887-69959148	WT	KO1	OK	0.460328	3.51601	2.93321	6.82138	5e-05	0.00026409	yes
LBP	LBP	LBP	chr20:38346410-38377011	WT	KO1	OK	2.28932	17.4823	2.93291	10.1018	5e-05	0.00026409	yes
TNFSF14	TNFSF14	TNFSF14	chr19:6661252-6670588	WT	KO1	OK	0.360159	2.72343	2.91872	8.03121	5e-05	0.00026409	yes
IQGAP2	IQGAP2	IQGAP2	chr5:76403254-76708132	WT	KO1	OK	3.13316	23.681	2.91804	9.89693	5e-05	0.00026409	yes
SNTB1	SNTB1	SNTB1	chr8:120535744-120812069	WT	KO1	OK	0.187188	1.41432	2.91754	6.98866	5e-05	0.00026409	yes
EN1	EN1	EN1	chr2:118842170-118848183	WT	KO1	OK	0.129686	0.955293	2.88092	4.38719	5e-05	0.00026409	yes
MOB3B	MOB3B	MOB3B	chr9:27325208-27529852	WT	KO1	OK	0.494975	3.62571	2.87284	9.6455	5e-05	0.00026409	yes
CDH2	CDH2	CDH2	chr18:27950962-28177446	WT	KO1	OK	3.69084	26.8479	2.86279	11.7412	5e-05	0.00026409	yes
COL4A6	COL4A6	COL4A6	chrX:108155606-108439497	WT	KO1	OK	5.46539	39.3138	2.84664	12.371	5e-05	0.00026409	yes
TMEM178A	TMEM178A	TMEM178A	chr2:39665497-39717963	WT	KO1	OK	0.412486	2.96309	2.84469	4.92822	5e-05	0.00026409	yes
BMPER	BMPER	BMPER	chr7:33904910-34155872	WT	KO1	OK	0.264437	1.89723	2.84289	7.73674	5e-05	0.00026409	yes
CPQ	CPQ	CPQ	chr8:96645226-97446497	WT	KO1	OK	1.32907	9.45844	2.83119	3.67248	5e-05	0.00026409	yes
CYP7B1	CYP7B1	CYP7B1	chr8:64586592-64798791	WT	KO1	OK	0.092508	0.657331	2.82897	5.04381	5e-05	0.00026409	yes
NCKAP5	NCKAP5	NCKAP5	chr2:132671798-133568460	WT	KO1	OK	0.844187	5.90188	2.80554	9.59425	5e-05	0.00026409	yes
PITX2	PITX2	PITX2	chr4:110617423-110642123	WT	KO1	OK	0.591111	4.10235	2.79495	6.33138	5e-05	0.00026409	yes
ALX4	ALX4	ALX4	chr11:44260727-44310166	WT	KO1	OK	0.582182	4.02363	2.78896	9.36949	5e-05	0.00026409	yes
SLC16A2	SLC16A2	SLC16A2	chrX:74421492-74533929	WT	KO1	OK	3.82139	25.9097	2.76132	11.4526	5e-05	0.00026409	yes
KIF26A	KIF26A	KIF26A	chr14:104138722-104180898	WT	KO1	OK	0.118897	0.79516	2.74154	6.19948	5e-05	0.00026409	yes
SNAP25	SNAP25	SNAP25	chr20:10023811-10307420	WT	KO1	OK	4.37299	29.214	2.73997	5.96643	5e-05	0.00026409	yes
DPYSL3	DPYSL3	DPYSL3	chr5:147390807-147510056	WT	KO1	OK	4.82656	31.9913	2.72861	11.6825	5e-05	0.00026409	yes
TNFAIP8L3	TNFAIP8L3	TNFAIP8L3	chr15:51056600-51105276	WT	KO1	OK	0.638214	4.15023	2.70108	6.94722	5e-05	0.00026409	yes
SLC38A5	SLC38A5	SLC38A5	chrX:48458536-48470256	WT	KO1	OK	0.218587	1.42046	2.70008	4.50193	5e-05	0.00026409	yes
MAN1C1	MAN1C1	MAN1C1	chr1:25617467-25786207	WT	KO1	OK	0.15901	1.02273	2.68525	4.70603	5e-05	0.00026409	yes
PTPRB	PTPRB	PTPRB	chr12:70516850-70637440	WT	KO1	OK	0.101568	0.651724	2.68182	6.03583	5e-05	0.00026409	yes
EPHA4	EPHA4	EPHA4	chr2:221418026-221574202	WT	KO1	OK	0.509643	3.26586	2.6799	9.0793	5e-05	0.00026409	yes
KIAA1462	KIAA1462	KIAA1462	chr10:30012799-30059559	WT	KO1	OK	0.991025	6.21418	2.64857	10.4675	5e-05	0.00026409	yes
ZNF841	ZNF841	ZNF841	chr19:52064465-52095765	WT	KO1	OK	0.590137	3.69752	2.64744	8.05268	5e-05	0.00026409	yes
KRT85	KRT85	KRT85	chr12:52360005-52367525	WT	KO1	OK	0.261212	1.62226	2.63471	4.54731	5e-05	0.00026409	yes
ITIH2	ITIH2	ITIH2	chr10:7703272-7749520	WT	KO1	OK	0.773878	4.77482	2.62527	8.33977	5e-05	0.00026409	yes
SLC2A14	SLC2A14	SLC2A14	chr12:7812511-7891196	WT	KO1	OK	0.0825484	0.50495	2.61283	2.40462	5e-05	0.00026409	yes
PPP1R14D	PPP1R14D	PPP1R14D	chr15:40815444-40828709	WT	KO1	OK	1.14776	6.99329	2.60715	5.50478	5e-05	0.00026409	yes
DNER	DNER	DNER	chr2:229357628-229714570	WT	KO1	OK	0.786423	4.70727	2.58152	8.28017	5e-05	0.00026409	yes
GBP2	GBP2	GBP2	chr1:89106132-89126159	WT	KO1	OK	9.98759	59.3939	2.57211	11.2441	5e-05	0.00026409	yes
STK33	STK33	STK33	chr11:8391865-8594289	WT	KO1	OK	0.268876	1.55171	2.52885	4.30689	5e-05	0.00026409	yes
VDR	VDR	VDR	chr12:47841536-47905031	WT	KO1	OK	1.06953	6.15473	2.52471	9.07167	5e-05	0.00026409	yes
NEURL1B	NEURL1B	NEURL1B	chr5:172641265-172691530	WT	KO1	OK	0.306101	1.75271	2.51751	7.3098	5e-05	0.00026409	yes
SLC9A9	SLC9A9	SLC9A9	chr3:143265221-143848531	WT	KO1	OK	0.17936	1.02361	2.51273	5.24908	5e-05	0.00026409	yes
COL4A5	COL4A5	COL4A5	chrX:108439843-108697545	WT	KO1	OK	6.7821	38.6735	2.51154	11.2127	5e-05	0.00026409	yes
ADRB2	ADRB2	ADRB2	chr5:148826592-148828634	WT	KO1	OK	0.298896	1.69522	2.50376	4.93569	5e-05	0.00026409	yes
NTNG2	NTNG2	NTNG2	chr9:132161946-132242833	WT	KO1	OK	1.08259	6.11206	2.49717	8.35927	5e-05	0.00026409	yes
BHLHE41	BHLHE41	BHLHE41	chr12:26120025-26125070	WT	KO1	OK	0.194239	1.09332	2.49281	5.44446	5e-05	0.00026409	yes
RBMS3	RBMS3	RBMS3	chr3:29281311-30010395	WT	KO1	OK	0.474667	2.66743	2.49046	3.71542	5e-05	0.00026409	yes
KLHL3	KLHL3	KLHL3	chr5:137617499-137736090	WT	KO1	OK	0.176781	0.993356	2.49035	5.9111	5e-05	0.00026409	yes
RASSF10	RASSF10	RASSF10	chr11:13009422-13012106	WT	KO1	OK	2.3548	12.8641	2.44968	9.02671	5e-05	0.00026409	yes
SLAMF7	SLAMF7	SLAMF7	chr1:160739056-160754818	WT	KO1	OK	0.269662	1.47276	2.4493	3.57852	5e-05	0.00026409	yes
ZMIZ1-AS1	ZMIZ1-AS1	ZMIZ1-AS1	chr10:78943325-79067448	WT	KO1	OK	0.725011	3.92076	2.43506	6.63231	5e-05	0.00026409	yes
SDS	SDS	SDS	chr12:113392445-113403887	WT	KO1	OK	0.619298	3.34402	2.43288	5.58908	5e-05	0.00026409	yes
SFMBT2	SFMBT2	SFMBT2	chr10:7158623-7411486	WT	KO1	OK	2.71346	14.6255	2.43028	10.2619	5e-05	0.00026409	yes
PAX6	PAX6	PAX6	chr11:31784791-31887041	WT	KO1	OK	0.482599	2.59572	2.42724	4.54497	5e-05	0.00026409	yes
ZSCAN18	ZSCAN18	ZSCAN18	chr19:58083841-58118426	WT	KO1	OK	0.122186	0.65256	2.41703	2.47966	5e-05	0.00026409	yes
CPVL	CPVL	CPVL	chr7:28979966-29146537	WT	KO1	OK	0.270928	1.43391	2.40397	3.87236	5e-05	0.00026409	yes
LSAMP	LSAMP	LSAMP	chr3:115802362-116445538	WT	KO1	OK	0.146382	0.769185	2.39359	5.73742	5e-05	0.00026409	yes
ASB4	ASB4	ASB4	chr7:95485900-95540231	WT	KO1	OK	0.418264	2.19575	2.39223	5.46998	5e-05	0.00026409	yes
CCDC71L	CCDC71L	CCDC71L	chr7:106656764-106661188	WT	KO1	OK	4.75424	24.9075	2.38929	10.0869	5e-05	0.00026409	yes
C1R	C1R	C1R	chr12:7080210-7092447	WT	KO1	OK	117.008	608.582	2.37885	10.3307	5e-05	0.00026409	yes
ZNF548	ZNF548	ZNF548	chr19:57389849-57402551	WT	KO1	OK	0.605537	3.129	2.36942	7.52195	5e-05	0.00026409	yes
LINC01239	LINC01239	LINC01239	chr9:22646199-22824213	WT	KO1	OK	0.27161	1.40295	2.36885	4.72528	5e-05	0.00026409	yes
EVA1A	EVA1A	EVA1A	chr2:75492317-75569722	WT	KO1	OK	0.790223	4.06901	2.36435	5.44082	5e-05	0.00026409	yes
SIDT1	SIDT1	SIDT1	chr3:113532370-113629575	WT	KO1	OK	0.577886	2.97302	2.36307	7.33642	5e-05	0.00026409	yes
GMPR	GMPR	GMPR	chr6:16238579-16295549	WT	KO1	OK	2.82074	14.5089	2.36279	8.1032	5e-05	0.00026409	yes
ADAMTS16	ADAMTS16	ADAMTS16	chr5:5140329-5320302	WT	KO1	OK	0.286511	1.46761	2.3568	5.64561	5e-05	0.00026409	yes
ZNF608	ZNF608	ZNF608	chr5:124636916-124745112	WT	KO1	OK	0.496826	2.53801	2.35288	7.61131	5e-05	0.00026409	yes
SLC22A4	SLC22A4	SLC22A4	chr5:132294451-132395614	WT	KO1	OK	3.84195	19.6024	2.35112	4.67299	5e-05	0.00026409	yes
C3orf80	C3orf80	C3orf80	chr3:160225635-160228213	WT	KO1	OK	0.383061	1.9544	2.35108	5.57943	5e-05	0.00026409	yes
CXXC4	CXXC4	CXXC4	chr4:104468305-104697592	WT	KO1	OK	0.198866	1.01332	2.34923	5.10904	5e-05	0.00026409	yes
SLC7A2	SLC7A2	SLC7A2	chr8:17497087-17570568	WT	KO1	OK	0.77607	3.93123	2.34072	8.62781	5e-05	0.00026409	yes
AGT	AGT	AGT	chr1:230702522-230714590	WT	KO1	OK	0.464701	2.35379	2.34062	5.93891	5e-05	0.00026409	yes
ERV3-1	ERV3-1	ERV3-1	chr7:64974451-65006746	WT	KO1	OK	0.471844	2.3874	2.33906	4.88977	5e-05	0.00026409	yes
NREP	NREP	NREP	chr5:111496034-112017306	WT	KO1	OK	6.26505	31.5825	2.33373	3.02809	5e-05	0.00026409	yes
DRD1	DRD1	DRD1	chr5:175440671-175444160	WT	KO1	OK	0.717543	3.53758	2.30163	7.21312	5e-05	0.00026409	yes
MYBL1	MYBL1	MYBL1	chr8:66562174-66613249	WT	KO1	OK	0.948643	4.66434	2.29774	8.22358	5e-05	0.00026409	yes
GABRA5	GABRA5	GABRA5	chr15:26866718-26949210	WT	KO1	OK	11.6954	57.3096	2.29284	9.90359	5e-05	0.00026409	yes
LOX	LOX	LOX	chr5:122063194-122078501	WT	KO1	OK	0.28897	1.40188	2.27838	5.7536	5e-05	0.00026409	yes
ZC4H2	ZC4H2	ZC4H2	chrX:64915801-65034744	WT	KO1	OK	1.25905	6.09802	2.276	7.53125	5e-05	0.00026409	yes
CCBE1	CCBE1	CCBE1	chr18:59430938-59697412	WT	KO1	OK	0.318005	1.53907	2.27493	6.91812	5e-05	0.00026409	yes
UNC5D	UNC5D	UNC5D	chr8:35235456-35796550	WT	KO1	OK	0.300827	1.45111	2.27015	6.9497	5e-05	0.00026409	yes
SSBP2	SSBP2	SSBP2	chr5:81417359-81751253	WT	KO1	OK	0.917121	4.3876	2.25825	7.74765	5e-05	0.00026409	yes
SALL1	SALL1	SALL1	chr16:50878772-51409868	WT	KO1	OK	0.373948	1.78748	2.25702	6.70033	5e-05	0.00026409	yes
CFB	CFB	CFB	chr6_GL000256v2_alt:3247132-3253273	WT	KO1	OK	0.66558	3.16066	2.24754	6.45237	5e-05	0.00026409	yes
CASP1	CASP1	CASP1	chr11:105025509-105035157	WT	KO1	OK	11.0821	52.1992	2.2358	6.25722	5e-05	0.00026409	yes
CLDN2	CLDN2	CLDN2	chrX:106900062-106930861	WT	KO1	OK	51.5315	242.525	2.23461	9.92089	5e-05	0.00026409	yes
ATP8B4	ATP8B4	ATP8B4	chr15:49858237-50119222	WT	KO1	OK	0.217669	1.02206	2.23127	5.28316	5e-05	0.00026409	yes
LOC100422737	LOC100422737	LOC100422737	chr6:106717451-106787425	WT	KO1	OK	1.02604	4.81755	2.23121	5.82076	5e-05	0.00026409	yes
ZNF583	ZNF583	ZNF583	chr19:56404013-56425031	WT	KO1	OK	0.192373	0.901205	2.22795	3.71349	5e-05	0.00026409	yes
FZD7	FZD7	FZD7	chr2:202034586-202038437	WT	KO1	OK	5.88381	27.5473	2.22709	9.45322	5e-05	0.00026409	yes
GBP4	GBP4	GBP4	chr1:89181147-89198950	WT	KO1	OK	16.3074	76.2629	2.22545	9.85346	5e-05	0.00026409	yes
IRF8	IRF8	IRF8	chr16:85899167-85922605	WT	KO1	OK	0.335627	1.55948	2.21613	5.03186	5e-05	0.00026409	yes
ACSL5	ACSL5	ACSL5	chr10:112374157-112428380	WT	KO1	OK	1.92283	8.90339	2.21112	8.16962	5e-05	0.00026409	yes
ROBO1	ROBO1	ROBO1	chr3:78597237-79767909	WT	KO1	OK	5.42494	25.0392	2.20651	9.10512	5e-05	0.00026409	yes
LHFP	LHFP	LHFP	chr13:39342891-39603219	WT	KO1	OK	1.0895	5.0178	2.20339	6.80971	5e-05	0.00026409	yes
PTX3	PTX3	PTX3	chr3:157259742-157503626	WT	KO1	OK	0.498761	2.28301	2.19452	4.83694	5e-05	0.00026409	yes
WISP1	WISP1	WISP1	chr8:133191038-133231689	WT	KO1	OK	0.650791	2.95605	2.1834	7.00679	5e-05	0.00026409	yes
RFTN1	RFTN1	RFTN1	chr3:16315844-16513715	WT	KO1	OK	4.16475	18.8332	2.17698	8.79124	5e-05	0.00026409	yes
GLIPR2	GLIPR2	GLIPR2	chr9:36136535-36163913	WT	KO1	OK	1.14824	5.18976	2.17624	6.20595	5e-05	0.00026409	yes
CIART	CIART	CIART	chr1:150282532-150287092	WT	KO1	OK	0.68932	3.06086	2.15069	4.20286	5e-05	0.00026409	yes
NFE2	NFE2	NFE2	chr12:54292106-54301037	WT	KO1	OK	0.587024	2.60067	2.14739	4.66671	5e-05	0.00026409	yes
TNC	TNC	TNC	chr9:115019575-115118257	WT	KO1	OK	0.669455	2.95656	2.14286	7.85379	5e-05	0.00026409	yes
C10orf11	C10orf11	C10orf11	chr10:75431645-76557376	WT	KO1	OK	4.34069	19.1205	2.13912	6.79357	5e-05	0.00026409	yes
SPOCK1	SPOCK1	SPOCK1	chr5:136975297-137499329	WT	KO1	OK	1.96186	8.6205	2.13555	8.33088	5e-05	0.00026409	yes
KCNJ2	KCNJ2	KCNJ2	chr17:70169534-70180042	WT	KO1	OK	0.499462	2.18026	2.12605	6.74702	5e-05	0.00026409	yes
GPR176	GPR176	GPR176	chr15:39799021-39920892	WT	KO1	OK	2.07069	9.00517	2.12065	7.94218	5e-05	0.00026409	yes
PAK3	PAK3	PAK3	chrX:110944240-111227361	WT	KO1	OK	1.39147	6.03629	2.11705	7.97966	5e-05	0.00026409	yes
IFI44L	IFI44L	IFI44L	chr1:78620381-78646145	WT	KO1	OK	2.72207	11.8076	2.11694	8.74223	5e-05	0.00026409	yes
TGFB2	TGFB2	TGFB2	chr1:218344195-219173788	WT	KO1	OK	3.17207	13.7578	2.11675	8.58892	5e-05	0.00026409	yes
DPY19L2	DPY19L2	DPY19L2	chr12:63558912-63668574	WT	KO1	OK	0.188859	0.818484	2.11565	4.62681	5e-05	0.00026409	yes
SAA1	SAA1	SAA1	chr11:18266224-18269976	WT	KO1	OK	1.29241	5.5924	2.1134	3.64222	5e-05	0.00026409	yes
ARRDC3	ARRDC3	ARRDC3	chr5:91368723-91420715	WT	KO1	OK	15.1566	65.4273	2.10995	9.16171	5e-05	0.00026409	yes
KALRN	KALRN	KALRN	chr3:124094680-124726325	WT	KO1	OK	0.35271	1.5192	2.10676	3.9609	5e-05	0.00026409	yes
IGFN1	IGFN1	IGFN1	chr1:201190824-201228952	WT	KO1	OK	0.383748	1.61521	2.07349	7.22705	5e-05	0.00026409	yes
NKD1	NKD1	NKD1	chr16:50548329-50640860	WT	KO1	OK	0.236093	0.992956	2.07237	6.24427	5e-05	0.00026409	yes
C1S	C1S	C1S	chr12:7060675-7071031	WT	KO1	OK	165.298	694.852	2.07163	8.93484	5e-05	0.00026409	yes
CACNA1I	CACNA1I	CACNA1I	chr22:39570752-39689736	WT	KO1	OK	0.232194	0.974373	2.06914	6.39013	5e-05	0.00026409	yes
GBP3	GBP3	GBP3	chr1:89006676-89022866	WT	KO1	OK	18.9468	79.3894	2.06699	8.9809	5e-05	0.00026409	yes
GXYLT2	GXYLT2	GXYLT2	chr3:72888233-72975371	WT	KO1	OK	0.445911	1.86464	2.06406	4.15365	5e-05	0.00026409	yes
ARID5B	ARID5B	ARID5B	chr10:61901253-62096948	WT	KO1	OK	2.48193	10.3768	2.06383	8.55534	5e-05	0.00026409	yes
ATP6V0A4	ATP6V0A4	ATP6V0A4	chr7:138706293-138806026	WT	KO1	OK	0.401082	1.6751	2.06228	4.682	5e-05	0.00026409	yes
PCDHGB5	PCDHGB5	PCDHGB5	chr5:141330684-141512981	WT	KO1	OK	0.744502	3.05905	2.03873	2.82964	5e-05	0.00026409	yes
UG0898H09	UG0898H09	UG0898H09	chr8:62248941-62999652	WT	KO1	OK	0.125597	0.515005	2.03579	4.42182	5e-05	0.00026409	yes
KCNE4	KCNE4	KCNE4	chr2:223051929-223055637	WT	KO1	OK	0.923361	3.78453	2.03515	6.52788	5e-05	0.00026409	yes
DBP	DBP	DBP	chr19:48630559-48637550	WT	KO1	OK	1.12792	4.61957	2.03409	5.94597	5e-05	0.00026409	yes
PLEKHG1	PLEKHG1	PLEKHG1	chr6:150599862-150843663	WT	KO1	OK	0.184252	0.753275	2.0315	5.3733	5e-05	0.00026409	yes
ZNF853	ZNF853	ZNF853	chr7:6615895-6624290	WT	KO1	OK	0.717316	2.92613	2.02831	6.32257	5e-05	0.00026409	yes
WLS	WLS	WLS	chr1:67701465-68232601	WT	KO1	OK	4.46708	18.1777	2.02476	2.86191	5e-05	0.00026409	yes
NRXN3	NRXN3	NRXN3	chr14:78170372-79868290	WT	KO1	OK	0.155944	0.631202	2.01708	5.22045	5e-05	0.00026409	yes
MOXD1	MOXD1	MOXD1	chr6:132296054-132401534	WT	KO1	OK	0.284288	1.14909	2.01507	4.48141	5e-05	0.00026409	yes
ADAM12	ADAM12	ADAM12	chr10:126012384-126388558	WT	KO1	OK	0.681059	2.75239	2.01484	6.96209	5e-05	0.00026409	yes
TCEA2	TCEA2	TCEA2	chr20:64057085-64072347	WT	KO1	OK	3.75631	15.1456	2.01151	7.15381	5e-05	0.00026409	yes
AK5	AK5	AK5	chr1:77281976-77559969	WT	KO1	OK	1.16234	4.67125	2.00678	6.779	5e-05	0.00026409	yes
FRMD5	FRMD5	FRMD5	chr15:43870760-44195294	WT	KO1	OK	1.24987	5.01298	2.0039	7.02216	5e-05	0.00026409	yes
TMEM158	TMEM158	TMEM158	chr3:45224463-45226322	WT	KO1	OK	4.53377	18.1208	1.99886	7.51104	5e-05	0.00026409	yes
FGF5	FGF5	FGF5	chr4:80266587-80291017	WT	KO1	OK	0.262874	1.05046	1.99858	5.19023	5e-05	0.00026409	yes
C1orf21	C1orf21	C1orf21	chr1:184387015-184629021	WT	KO1	OK	0.425872	1.69734	1.99478	6.99435	5e-05	0.00026409	yes
ANKRD22	ANKRD22	ANKRD22	chr10:88802729-88851975	WT	KO1	OK	1.01179	4.0037	1.98442	6.76515	5e-05	0.00026409	yes
FOXD1	FOXD1	FOXD1	chr5:73446255-73448527	WT	KO1	OK	2.72537	10.7842	1.9844	7.21944	5e-05	0.00026409	yes
IFITM1	IFITM1	IFITM1	chr11:313990-315272	WT	KO1	OK	306.324	1210.34	1.98228	8.62121	5e-05	0.00026409	yes
G0S2	G0S2	G0S2	chr1:209661358-209742562	WT	KO1	OK	3.82269	15.102	1.98208	5.98491	5e-05	0.00026409	yes
GNG2	GNG2	GNG2	chr14:51860303-51969800	WT	KO1	OK	0.266977	1.05005	1.97567	4.00385	5e-05	0.00026409	yes
TNFSF10	TNFSF10	TNFSF10	chr3:172505507-172523507	WT	KO1	OK	44.8633	175.027	1.96397	8.76196	5e-05	0.00026409	yes
PRICKLE1	PRICKLE1	PRICKLE1	chr12:42458337-42589770	WT	KO1	OK	0.989076	3.8442	1.95853	6.73085	5e-05	0.00026409	yes
PLEKHS1	PLEKHS1	PLEKHS1	chr10:113751453-113782433	WT	KO1	OK	0.348912	1.35504	1.9574	4.05194	5e-05	0.00026409	yes
TWIST1	TWIST1	TWIST1	chr7:19115467-19117672	WT	KO1	OK	1.08609	4.19393	1.94916	5.46892	5e-05	0.00026409	yes
BDNF	BDNF	BDNF	chr11:27506851-27722058	WT	KO1	OK	4.12183	15.894	1.94713	7.80569	5e-05	0.00026409	yes
HAS2	HAS2	HAS2	chr8:121613030-121645324	WT	KO1	OK	3.19966	12.2951	1.9421	7.36891	5e-05	0.00026409	yes
NANOG	NANOG	NANOG	chr12:7789395-7796061	WT	KO1	OK	0.165304	0.635053	1.94176	2.55579	5e-05	0.00026409	yes
IL6	IL6	IL6	chr7:22725394-22732002	WT	KO1	OK	22.323	84.6524	1.92302	8.05312	5e-05	0.00026409	yes
CHST2	CHST2	CHST2	chr3:143119775-143124014	WT	KO1	OK	0.425889	1.61346	1.92161	5.50064	5e-05	0.00026409	yes
CD82	CD82	CD82	chr11:44565590-44619765	WT	KO1	OK	5.3757	20.329	1.91902	7.34247	5e-05	0.00026409	yes
IFI16	IFI16	IFI16	chr1:159009891-159055155	WT	KO1	OK	41.0081	154.338	1.91212	8.59876	5e-05	0.00026409	yes
BMP2	BMP2	BMP2	chr20:6768097-6780278	WT	KO1	OK	0.63423	2.35549	1.89295	5.58125	5e-05	0.00026409	yes
FAM198B	FAM198B	FAM198B	chr4:158124579-158173050	WT	KO1	OK	0.157147	0.57948	1.88265	3.83475	5e-05	0.00026409	yes
SLC8A1	SLC8A1	SLC8A1	chr2:39917633-40512435	WT	KO1	OK	0.153474	0.565257	1.88091	4.15513	5e-05	0.00026409	yes
LOC400706	LOC400706	LOC400706	chr19:46057677-46077629	WT	KO1	OK	1.11838	4.11346	1.87894	6.24545	5e-05	0.00026409	yes
FHDC1	FHDC1	FHDC1	chr4:152942982-152979696	WT	KO1	OK	0.436333	1.60021	1.87476	5.9525	5e-05	0.00026409	yes
PIK3IP1	PIK3IP1	PIK3IP1	chr22:31281592-31292534	WT	KO1	OK	1.13097	4.13016	1.86864	5.86203	5e-05	0.00026409	yes
SLC27A2	SLC27A2	SLC27A2	chr15:50182195-50236392	WT	KO1	OK	17.5211	63.6329	1.86068	8.12276	5e-05	0.00026409	yes
RNF125	RNF125	RNF125	chr18:32018481-32073191	WT	KO1	OK	0.235105	0.853747	1.8605	4.94016	5e-05	0.00026409	yes
ZNF304	ZNF304	ZNF304	chr19:57351273-57359897	WT	KO1	OK	0.483783	1.75407	1.85827	5.3494	5e-05	0.00026409	yes
SDK1	SDK1	SDK1	chr7:3301447-4268999	WT	KO1	OK	0.427326	1.5471	1.85615	5.838	5e-05	0.00026409	yes
RPS6KA5	RPS6KA5	RPS6KA5	chr14:90868121-91060649	WT	KO1	OK	4.34665	15.7077	1.85349	6.24111	5e-05	0.00026409	yes
SRPX	SRPX	SRPX	chrX:38149334-38220924	WT	KO1	OK	2.39705	8.64198	1.8501	6.2546	5e-05	0.00026409	yes
GBP7	GBP7	GBP7	chr1:89131750-89176040	WT	KO1	OK	0.716592	2.57286	1.84415	5.16566	5e-05	0.00026409	yes
ZNF503	ZNF503	ZNF503	chr10:75279725-75408982	WT	KO1	OK	4.36445	15.5493	1.83298	6.93358	5e-05	0.00026409	yes
TMEM130	TMEM130	TMEM130	chr7:98846487-98870050	WT	KO1	OK	0.267807	0.946498	1.8214	3.36933	5e-05	0.00026409	yes
GALNT18	GALNT18	GALNT18	chr11:11270873-11622014	WT	KO1	OK	6.21233	21.9143	1.81867	7.42866	5e-05	0.00026409	yes
ITGB2	ITGB2	ITGB2	chr21:44885953-44929680	WT	KO1	OK	1.88176	6.57683	1.80531	5.76039	5e-05	0.00026409	yes
RAD9B	RAD9B	RAD9B	chr12:110502199-110532086	WT	KO1	OK	0.143935	0.499812	1.79597	1.84385	5e-05	0.00026409	yes
SUSD4	SUSD4	SUSD4	chr1:223220818-223364202	WT	KO1	OK	0.242512	0.83924	1.79103	3.05203	5e-05	0.00026409	yes
CCL26	CCL26	CCL26	chr7:75769523-75789746	WT	KO1	OK	5.55793	19.2203	1.79001	5.31284	5e-05	0.00026409	yes
HIVEP3	HIVEP3	HIVEP3	chr1:41506364-42035925	WT	KO1	OK	1.12947	3.90431	1.78942	4.22642	5e-05	0.00026409	yes
ANXA8L1	ANXA8L1	ANXA8L1	chr10:46375589-46391783	WT	KO1	OK	5.76088	19.8128	1.78207	7.02849	5e-05	0.00026409	yes
ZNF136	ZNF136	ZNF136	chr19:12163056-12189249	WT	KO1	OK	0.453955	1.55248	1.77395	4.65625	5e-05	0.00026409	yes
MIR100HG	MIR100HG	MIR100HG	chr11:122028328-122422871	WT	KO1	OK	2.14498	7.32608	1.77208	6.2109	5e-05	0.00026409	yes
PDZK1IP1	PDZK1IP1	PDZK1IP1	chr1:47183588-47190099	WT	KO1	OK	13.1153	44.717	1.76957	6.78055	5e-05	0.00026409	yes
KCNH1	KCNH1	KCNH1	chr1:210678314-211134115	WT	KO1	OK	0.22529	0.767146	1.76772	5.03214	5e-05	0.00026409	yes
PBX1	PBX1	PBX1	chr1:164559359-164851823	WT	KO1	OK	11.1921	37.7179	1.75277	7.83807	5e-05	0.00026409	yes
SEMA3F	SEMA3F	SEMA3F	chr3:50088907-50189075	WT	KO1	OK	5.87128	19.5567	1.73592	4.09994	5e-05	0.00026409	yes
DOPEY1	DOPEY1	DOPEY1	chr6:83067665-83198935	WT	KO1	OK	1.21299	4.01382	1.72641	2.77386	5e-05	0.00026409	yes
HK2	HK2	HK2	chr2:74832654-74893354	WT	KO1	OK	0.877721	2.90206	1.72524	6.32049	5e-05	0.00026409	yes
GIMAP2	GIMAP2	GIMAP2	chr7:150685705-150693640	WT	KO1	OK	2.02951	6.6887	1.7206	5.37445	5e-05	0.00026409	yes
TCF4	TCF4	TCF4	chr18:55222330-55635993	WT	KO1	OK	0.796783	2.60466	1.70883	6.13721	5e-05	0.00026409	yes
NEXN	NEXN	NEXN	chr1:77881347-77943893	WT	KO1	OK	0.93774	3.06016	1.70635	4.94748	5e-05	0.00026409	yes
LOC100288152	LOC100288152	LOC100288152	chr5:470509-524434	WT	KO1	OK	2.31907	7.52496	1.69814	3.3892	5e-05	0.00026409	yes
CLTCL1	CLTCL1	CLTCL1	chr22:19179473-19291716	WT	KO1	OK	1.53934	4.96181	1.68856	6.43231	5e-05	0.00026409	yes
ZBP1	ZBP1	ZBP1	chr20:57603845-57620576	WT	KO1	OK	1.10398	3.55518	1.68722	4.00473	5e-05	0.00026409	yes
FOXP1	FOXP1	FOXP1	chr3:70954713-71583989	WT	KO1	OK	2.70754	8.70037	1.68409	6.2737	5e-05	0.00026409	yes
ANPEP	ANPEP	ANPEP	chr15:89784894-89814840	WT	KO1	OK	7.41443	23.7694	1.6807	7.13286	5e-05	0.00026409	yes
DNAJC15	DNAJC15	DNAJC15	chr13:43023225-43109170	WT	KO1	OK	0.74865	2.39889	1.68001	4.93805	5e-05	0.00026409	yes
LIMA1	LIMA1	LIMA1	chr12:50175779-50283570	WT	KO1	OK	6.49884	20.5279	1.65933	7.01389	5e-05	0.00026409	yes
GBP5	GBP5	GBP5	chr1:89258950-89272861	WT	KO1	OK	4.96763	15.5274	1.64419	6.85172	5e-05	0.00026409	yes
SULF2	SULF2	SULF2	chr20:47657405-47786616	WT	KO1	OK	2.93772	9.17577	1.64313	6.49954	5e-05	0.00026409	yes
C8orf46	C8orf46	C8orf46	chr8:66493255-66518524	WT	KO1	OK	0.204634	0.638363	1.64134	3.32915	5e-05	0.00026409	yes
GPR39	GPR39	GPR39	chr2:132416573-132671579	WT	KO1	OK	12.455	38.8093	1.63968	6.21438	5e-05	0.00026409	yes
STK17A	STK17A	STK17A	chr7:43583092-43729541	WT	KO1	OK	15.7645	49.0536	1.63768	5.60821	5e-05	0.00026409	yes
NID1	NID1	NID1	chr1:235975831-236065181	WT	KO1	OK	2.57171	7.9893	1.63534	6.5856	5e-05	0.00026409	yes
PARP8	PARP8	PARP8	chr5:50665898-50846522	WT	KO1	OK	0.335744	1.0418	1.63365	4.91403	5e-05	0.00026409	yes
GPR156	GPR156	GPR156	chr3:120165480-120244295	WT	KO1	OK	0.200046	0.618492	1.62842	3.2527	5e-05	0.00026409	yes
NNMT	NNMT	NNMT	chr11:114295812-114312516	WT	KO1	OK	122.743	378.859	1.62602	7.23815	5e-05	0.00026409	yes
GCNT4	GCNT4	GCNT4	chr5:75027463-75030899	WT	KO1	OK	0.639861	1.9715	1.62347	4.8522	5e-05	0.00026409	yes
CA9	CA9	CA9	chr9:35673917-35681157	WT	KO1	OK	5.03555	15.4522	1.61759	5.86661	5e-05	0.00026409	yes
TNS4	TNS4	TNS4	chr17:40475827-40501602	WT	KO1	OK	14.9966	45.9464	1.61532	7.15027	5e-05	0.00026409	yes
TBC1D2B	TBC1D2B	TBC1D2B	chr15:77994984-78077652	WT	KO1	OK	3.47795	10.6512	1.6147	6.80585	5e-05	0.00026409	yes
HS3ST3B1	HS3ST3B1	HS3ST3B1	chr17:14301049-14349404	WT	KO1	OK	1.34582	4.11939	1.61395	5.57618	5e-05	0.00026409	yes
EDNRA	EDNRA	EDNRA	chr4:147480916-147544954	WT	KO1	OK	0.452042	1.38303	1.61331	4.23913	5e-05	0.00026409	yes
IDO1	IDO1	IDO1	chr8:39913808-39928791	WT	KO1	OK	38.2328	116.517	1.60765	7.12509	5e-05	0.00026409	yes
GPR1	GPR1	GPR1	chr2:206175315-206266243	WT	KO1	OK	0.280872	0.853068	1.60275	2.63624	5e-05	0.00026409	yes
SAMD9L	SAMD9L	SAMD9L	chr7:93130053-93148388	WT	KO1	OK	15.9874	48.3855	1.59764	7.02003	5e-05	0.00026409	yes
RSAD2	RSAD2	RSAD2	chr2:6877664-6898232	WT	KO1	OK	20.596	62.3124	1.59715	7.08693	5e-05	0.00026409	yes
ITGA4	ITGA4	ITGA4	chr2:181456891-181657107	WT	KO1	OK	0.178037	0.537778	1.59483	2.74381	5e-05	0.00026409	yes
CDH1	CDH1	CDH1	chr16:68737289-68835542	WT	KO1	OK	17.3356	52.2514	1.59173	7.10904	5e-05	0.00026409	yes
ICA1	ICA1	ICA1	chr7:8113184-8343281	WT	KO1	OK	1.7526	5.27122	1.58864	5.11075	5e-05	0.00026409	yes
EEF1A2	EEF1A2	EEF1A2	chr20:63488011-63499315	WT	KO1	OK	33.8933	101.938	1.58863	7.05115	5e-05	0.00026409	yes
TRABD2A	TRABD2A	TRABD2A	chr2:84821666-84881245	WT	KO1	OK	0.664488	1.99331	1.58485	3.58201	5e-05	0.00026409	yes
HLX	HLX	HLX	chr1:220832762-220885058	WT	KO1	OK	1.02998	3.08768	1.58391	4.69368	5e-05	0.00026409	yes
FBXL7	FBXL7	FBXL7	chr5:15500195-15939796	WT	KO1	OK	0.448291	1.34263	1.58255	4.52048	5e-05	0.00026409	yes
CCL2	CCL2	CCL2	chr17:34255276-34257201	WT	KO1	OK	120.918	361.807	1.58118	6.80959	5e-05	0.00026409	yes
ITGA10	ITGA10	ITGA10	chr1:145891207-145910189	WT	KO1	OK	1.03423	3.0863	1.57732	5.51083	5e-05	0.00026409	yes
CCNE2	CCNE2	CCNE2	chr8:94823289-94895254	WT	KO1	OK	1.78307	5.31913	1.57683	2.54911	5e-05	0.00026409	yes
ACSL1	ACSL1	ACSL1	chr4:184755594-184826114	WT	KO1	OK	8.30605	24.7767	1.57675	6.76797	5e-05	0.00026409	yes
LIFR	LIFR	LIFR	chr5:38474962-38671216	WT	KO1	OK	3.34706	9.96769	1.57437	6.66605	5e-05	0.00026409	yes
IRX3	IRX3	IRX3	chr16:54283299-54286466	WT	KO1	OK	1.62288	4.8301	1.5735	5.16287	5e-05	0.00026409	yes
COL5A1	COL5A1	COL5A1	chr9:134641804-134872618	WT	KO1	OK	10.7642	32.0172	1.5726	7.02908	5e-05	0.00026409	yes
CP	CP	CP	chr3:149129583-149222045	WT	KO1	OK	32.0626	95.3342	1.5721	5.56919	5e-05	0.00026409	yes
ADGRA2	ADGRA2	ADGRA2	chr8:37796882-37849913	WT	KO1	OK	0.752868	2.23268	1.56831	3.68061	5e-05	0.00026409	yes
ENOX1	ENOX1	ENOX1	chr13:43213529-43786980	WT	KO1	OK	0.779071	2.3012	1.56256	4.52576	5e-05	0.00026409	yes
TRIM22	TRIM22	TRIM22	chr11:5689586-5710863	WT	KO1	OK	45.7494	134.94	1.5605	7.02248	5e-05	0.00026409	yes
FAM65B	FAM65B	FAM65B	chr6:24804280-25042168	WT	KO1	OK	0.92799	2.73575	1.55975	4.93137	5e-05	0.00026409	yes
MEX3A	MEX3A	MEX3A	chr1:156072012-156081998	WT	KO1	OK	0.237456	0.698209	1.556	4.15827	5e-05	0.00026409	yes
SCML1	SCML1	SCML1	chrX:17737448-17754988	WT	KO1	OK	6.50557	19.0434	1.54955	6.30263	5e-05	0.00026409	yes
TRAPPC2B	TRAPPC2B	TRAPPC2B	chr19:57363434-57379557	WT	KO1	OK	4.89684	14.3213	1.54824	4.47427	5e-05	0.00026409	yes
DENND2A	DENND2A	DENND2A	chr7:140518418-140641486	WT	KO1	OK	0.29157	0.851689	1.54649	3.58072	5e-05	0.00026409	yes
NRIR	NRIR	NRIR	chr2:6828553-6840464	WT	KO1	OK	1.10463	3.22602	1.5462	3.15108	5e-05	0.00026409	yes
PRKAR2B	PRKAR2B	PRKAR2B	chr7:107044732-107161811	WT	KO1	OK	0.896919	2.59881	1.5348	4.94414	5e-05	0.00026409	yes
CNRIP1	CNRIP1	CNRIP1	chr2:68284170-68320051	WT	KO1	OK	0.569021	1.64413	1.53078	3.42936	5e-05	0.00026409	yes
ADAMTS10	ADAMTS10	ADAMTS10	chr19:8580239-8610735	WT	KO1	OK	9.88607	28.5555	1.5303	5.37729	5e-05	0.00026409	yes
SMARCD3	SMARCD3	SMARCD3	chr7:151238972-151277145	WT	KO1	OK	6.39637	18.4627	1.52929	5.96495	5e-05	0.00026409	yes
C2orf66	C2orf66	C2orf66	chr2:196804414-196810276	WT	KO1	OK	0.299343	0.861453	1.52497	3.0604	5e-05	0.00026409	yes
LOC728743	LOC728743	LOC728743	chr7:150405751-150412470	WT	KO1	OK	3.1898	9.17536	1.5243	5.93	5e-05	0.00026409	yes
BCAM	BCAM	BCAM	chr19:44809058-44821421	WT	KO1	OK	14.3973	41.4033	1.52395	6.48294	5e-05	0.00026409	yes
AZIN2	AZIN2	AZIN2	chr1:33081112-33120531	WT	KO1	OK	3.16976	9.10004	1.5215	5.10898	5e-05	0.00026409	yes
FCMR	FCMR	FCMR	chr1:206897442-206922033	WT	KO1	OK	0.808958	2.31894	1.51933	3.97032	5e-05	0.00026409	yes
GABRE	GABRE	GABRE	chrX:151953123-151974679	WT	KO1	OK	18.1288	51.9583	1.51907	6.58616	5e-05	0.00026409	yes
FBN2	FBN2	FBN2	chr5:128257908-128538042	WT	KO1	OK	1.74393	4.9966	1.51861	6.29534	5e-05	0.00026409	yes
COL6A1	COL6A1	COL6A1	chr21:45981748-46005049	WT	KO1	OK	3.83987	10.9626	1.51346	6.1883	5e-05	0.00026409	yes
SLC4A4	SLC4A4	SLC4A4	chr4:71187285-71572087	WT	KO1	OK	0.774006	2.20734	1.51189	5.44908	5e-05	0.00026409	yes
EXOC3L1	EXOC3L1	EXOC3L1	chr16:67184378-67190204	WT	KO1	OK	0.693791	1.97598	1.51	4.17838	5e-05	0.00026409	yes
SOX8	SOX8	SOX8	chr16:981807-986979	WT	KO1	OK	0.738001	2.09998	1.50868	4.52159	5e-05	0.00026409	yes
MOCS1	MOCS1	MOCS1	chr6:39792382-39934551	WT	KO1	OK	0.586041	1.66731	1.50845	4.45419	5e-05	0.00026409	yes
TXK	TXK	TXK	chr4:48066392-48134256	WT	KO1	OK	0.237128	0.673518	1.50605	3.00708	5e-05	0.00026409	yes
ZDHHC14	ZDHHC14	ZDHHC14	chr6:157381524-157673945	WT	KO1	OK	1.2245	3.47428	1.50452	4.77495	5e-05	0.00026409	yes
B4GALNT4	B4GALNT4	B4GALNT4	chr11:369794-382117	WT	KO1	OK	2.92527	8.29826	1.50424	5.84974	5e-05	0.00026409	yes
ST5	ST5	ST5	chr11:8693351-8910951	WT	KO1	OK	3.03051	8.56502	1.4989	5.62528	5e-05	0.00026409	yes
ZNF432	ZNF432	ZNF432	chr19:52031378-52049124	WT	KO1	OK	0.817624	2.30018	1.49224	4.94448	5e-05	0.00026409	yes
IFI44	IFI44	IFI44	chr1:78649788-78664078	WT	KO1	OK	67.8143	190.75	1.49202	6.48064	5e-05	0.00026409	yes
SEMA6B	SEMA6B	SEMA6B	chr19:4542587-4559759	WT	KO1	OK	1.21689	3.42088	1.49117	5.1112	5e-05	0.00026409	yes
PDP1	PDP1	PDP1	chr8:93916854-93926068	WT	KO1	OK	7.25887	20.3468	1.48699	6.35755	5e-05	0.00026409	yes
DIO2	DIO2	DIO2	chr14:80197524-80455467	WT	KO1	OK	0.704009	1.96215	1.47877	5.00423	5e-05	0.00026409	yes
CR1L	CR1L	CR1L	chr1:207645112-207723691	WT	KO1	OK	0.754507	2.10274	1.47866	3.76216	5e-05	0.00026409	yes
UBA7	UBA7	UBA7	chr3:49805204-49813958	WT	KO1	OK	14.0744	39.2034	1.4779	6.48682	5e-05	0.00026409	yes
ZNF606	ZNF606	ZNF606	chr19:57977072-58007206	WT	KO1	OK	0.362594	1.00939	1.47706	3.57566	5e-05	0.00026409	yes
AUTS2	AUTS2	AUTS2	chr7:69598918-70793068	WT	KO1	OK	2.09936	5.84397	1.477	5.4744	5e-05	0.00026409	yes
CLEC2B	CLEC2B	CLEC2B	chr12:9852368-9869859	WT	KO1	OK	3.69488	10.28	1.47625	5.45668	5e-05	0.00026409	yes
ATOX1	ATOX1	ATOX1	chr5:151742821-151758649	WT	KO1	OK	110.474	307.316	1.47601	6.28531	5e-05	0.00026409	yes
RGAG4	RGAG4	RGAG4	chrX:71911087-72143574	WT	KO1	OK	1.29457	3.58696	1.47029	5.11172	5e-05	0.00026409	yes
PRSS27	PRSS27	PRSS27	chr16:2712417-2720551	WT	KO1	OK	1.2132	3.35508	1.46752	3.77406	5e-05	0.00026409	yes
COL6A2	COL6A2	COL6A2	chr21:46098118-46132849	WT	KO1	OK	3.6977	10.2155	1.46606	5.74624	5e-05	0.00026409	yes
ZFP28	ZFP28	ZFP28	chr19:56538947-56556801	WT	KO1	OK	0.933639	2.57929	1.46604	4.80521	5e-05	0.00026409	yes
CPA4	CPA4	CPA4	chr7:130293133-130324180	WT	KO1	OK	0.411983	1.13392	1.46066	3.12025	5e-05	0.00026409	yes
RTP4	RTP4	RTP4	chr3:187368379-187371581	WT	KO1	OK	10.3264	28.3941	1.45925	5.55696	5e-05	0.00026409	yes
RANBP3L	RANBP3L	RANBP3L	chr5:36246918-36301909	WT	KO1	OK	0.214611	0.588445	1.45518	2.46124	5e-05	0.00026409	yes
CTSS	CTSS	CTSS	chr1:150730195-150765957	WT	KO1	OK	48.156	132.006	1.45481	6.47686	5e-05	0.00026409	yes
RNF212	RNF212	RNF212	chr4:1071477-1113564	WT	KO1	OK	0.81389	2.21936	1.44724	3.46573	5e-05	0.00026409	yes
SEPT4	SEPT4	SEPT4	chr17:58519836-58692055	WT	KO1	OK	5.84125	15.8919	1.44394	5.29464	5e-05	0.00026409	yes
SFRP1	SFRP1	SFRP1	chr8:41261956-41309471	WT	KO1	OK	6.59484	17.9119	1.44151	6.17325	5e-05	0.00026409	yes
S1PR3	S1PR3	S1PR3	chr9:88990862-89005154	WT	KO1	OK	5.94585	16.1429	1.44095	6.08347	5e-05	0.00026409	yes
MAP2K6	MAP2K6	MAP2K6	chr17:69414696-69542329	WT	KO1	OK	10.1665	27.5894	1.4403	5.9311	5e-05	0.00026409	yes
ADRA1D	ADRA1D	ADRA1D	chr20:4220630-4249012	WT	KO1	OK	1.80763	4.90088	1.43894	4.93479	5e-05	0.00026409	yes
PADI1	PADI1	PADI1	chr1:17205125-17246006	WT	KO1	OK	0.40353	1.09316	1.43776	3.8451	5e-05	0.00026409	yes
TMEM47	TMEM47	TMEM47	chrX:34627063-34657288	WT	KO1	OK	1.0404	2.81615	1.43658	4.80583	5e-05	0.00026409	yes
SOX4	SOX4	SOX4	chr6:21593740-21598618	WT	KO1	OK	9.27213	25.0732	1.43517	6.28603	5e-05	0.00026409	yes
RAB26	RAB26	RAB26	chr16:2148143-2154161	WT	KO1	OK	1.81166	4.89225	1.43319	4.28174	5e-05	0.00026409	yes
GSDMC	GSDMC	GSDMC	chr8:129748195-129786888	WT	KO1	OK	0.289788	0.781336	1.43094	2.99841	5e-05	0.00026409	yes
RN7SK	RN7SK	RN7SK	chr6:52995619-52995951	WT	KO1	OK	36.2209	97.5436	1.42922	4.81338	5e-05	0.00026409	yes
RAB27A	RAB27A	RAB27A	chr15:55202965-55289815	WT	KO1	OK	6.23784	16.7849	1.42804	5.96283	5e-05	0.00026409	yes
NAMPT	NAMPT	NAMPT	chr7:106248285-106285192	WT	KO1	OK	130.261	349.805	1.42515	6.14176	5e-05	0.00026409	yes
TGFBI	TGFBI	TGFBI	chr5:136028894-136063818	WT	KO1	OK	302.036	806.847	1.41757	5.98343	5e-05	0.00026409	yes
PDE7B	PDE7B	PDE7B	chr6:135851695-136195571	WT	KO1	OK	2.40389	6.4095	1.41484	5.65489	5e-05	0.00026409	yes
LOC101927809	LOC101927809	LOC101927809	chr18:36180000-36187435	WT	KO1	OK	2.25463	6.00858	1.41414	3.16608	5e-05	0.00026409	yes
CISH	CISH	CISH	chr3:50606453-50611831	WT	KO1	OK	1.18526	3.15601	1.4129	4.20359	5e-05	0.00026409	yes
ZNF717	ZNF717	ZNF717	chr3:75729960-75785583	WT	KO1	OK	1.14899	3.05849	1.41245	3.38854	5e-05	0.00026409	yes
SMIM3	SMIM3	SMIM3	chr5:150777945-150796736	WT	KO1	OK	1.66824	4.42736	1.40812	4.65395	5e-05	0.00026409	yes
RRAD	RRAD	RRAD	chr16:66921678-66925536	WT	KO1	OK	8.66966	22.9983	1.40748	5.50752	5e-05	0.00026409	yes
LIMCH1	LIMCH1	LIMCH1	chr4:41359606-41700044	WT	KO1	OK	16.186	42.8054	1.40305	6.31489	5e-05	0.00026409	yes
PTPRG	PTPRG	PTPRG	chr3:61561568-62318947	WT	KO1	OK	1.19769	3.16473	1.40182	5.1175	5e-05	0.00026409	yes
STOML1	STOML1	STOML1	chr15:73983217-73994622	WT	KO1	OK	5.81469	15.3299	1.39858	5.3516	5e-05	0.00026409	yes
SGCD	SGCD	SGCD	chr5:156326756-156767787	WT	KO1	OK	2.54018	6.68128	1.39519	3.24822	5e-05	0.00026409	yes
RTKN2	RTKN2	RTKN2	chr10:62193085-62268863	WT	KO1	OK	0.455929	1.19904	1.395	2.79737	5e-05	0.00026409	yes
RUNX3	RUNX3	RUNX3	chr1:24899510-24965010	WT	KO1	OK	3.81188	9.95412	1.38479	5.58547	5e-05	0.00026409	yes
SPOCK3	SPOCK3	SPOCK3	chr4:166733384-167234590	WT	KO1	OK	0.480943	1.25137	1.37957	2.67224	5e-05	0.00026409	yes
SHROOM2	SHROOM2	SHROOM2	chrX:9786455-9949443	WT	KO1	OK	0.329337	0.855968	1.37799	3.68266	5e-05	0.00026409	yes
EPHA5	EPHA5	EPHA5	chr4:65319562-65693386	WT	KO1	OK	0.217636	0.563563	1.37266	2.93943	5e-05	0.00026409	yes
ADAP1	ADAP1	ADAP1	chr7:897899-955407	WT	KO1	OK	2.26609	5.83494	1.36451	4.54855	5e-05	0.00026409	yes
PIK3R3	PIK3R3	PIK3R3	chr1:46040139-46185962	WT	KO1	OK	3.03308	7.78449	1.35982	5.08583	5e-05	0.00026409	yes
NALCN	NALCN	NALCN	chr13:100708324-101416462	WT	KO1	OK	0.279008	0.713072	1.35374	3.88719	5e-05	0.00026409	yes
TMEM154	TMEM154	TMEM154	chr4:152626113-152680165	WT	KO1	OK	0.590394	1.50467	1.3497	3.84125	5e-05	0.00026409	yes
RASA3	RASA3	RASA3	chr13:113977782-114132623	WT	KO1	OK	5.30592	13.503	1.3476	5.65226	5e-05	0.00026409	yes
THSD1	THSD1	THSD1	chr13:52377167-52406494	WT	KO1	OK	2.66268	6.76849	1.34596	5.06646	5e-05	0.00026409	yes
LOC101927415	LOC101927415	LOC101927415	chr12:123581065-123584327	WT	KO1	OK	0.398752	1.01235	1.34414	2.99262	5e-05	0.00026409	yes
COL16A1	COL16A1	COL16A1	chr1:31652246-31704167	WT	KO1	OK	0.728681	1.84909	1.34346	4.49425	5e-05	0.00026409	yes
MEG9	MEG9	MEG9	chr14:101069910-101072936	WT	KO1	OK	0.371773	0.942973	1.34279	3.05583	5e-05	0.00026409	yes
LOC101929723	LOC101929723	LOC101929723	chr2:41931598-41933723	WT	KO1	OK	5.20639	13.166	1.33846	4.27568	5e-05	0.00026409	yes
PMEPA1	PMEPA1	PMEPA1	chr20:57648391-57712780	WT	KO1	OK	37.995	95.9983	1.3372	5.83962	5e-05	0.00026409	yes
ADGRL1	ADGRL1	ADGRL1	chr19:14137151-14206185	WT	KO1	OK	1.34465	3.39684	1.33696	5.04934	5e-05	0.00026409	yes
GABRB3	GABRB3	GABRB3	chr15:26543545-26773788	WT	KO1	OK	14.7046	36.893	1.32708	5.80648	5e-05	0.00026409	yes
RET	RET	RET	chr10:43077068-43130349	WT	KO1	OK	0.988755	2.47868	1.32589	4.54121	5e-05	0.00026409	yes
NIM1K	NIM1K	NIM1K	chr5:43192067-43280850	WT	KO1	OK	0.401022	1.00126	1.32006	3.03996	5e-05	0.00026409	yes
COX6B2	COX6B2	COX6B2	chr19:55349701-55354814	WT	KO1	OK	0.519866	1.29688	1.31884	2.78607	5e-05	0.00026409	yes
SERPINB9P1	SERPINB9P1	SERPINB9P1	chr6:2854656-2876510	WT	KO1	OK	1.14543	2.85728	1.31875	3.2703	5e-05	0.00026409	yes
ELL2	ELL2	ELL2	chr5:95885097-96631085	WT	KO1	OK	6.97435	17.3543	1.31516	5.6299	5e-05	0.00026409	yes
TEF	TEF	TEF	chr22:41367332-41399328	WT	KO1	OK	1.41941	3.52906	1.31399	4.77638	5e-05	0.00026409	yes
CASP4	CASP4	CASP4	chr11:104942866-104968598	WT	KO1	OK	30.7922	76.4578	1.3121	5.71126	5e-05	0.00026409	yes
ALPK2	ALPK2	ALPK2	chr18:58481249-58628957	WT	KO1	OK	10.8504	26.9262	1.31127	5.85066	5e-05	0.00026409	yes
CACNA1H	CACNA1H	CACNA1H	chr16:1153240-1225254	WT	KO1	OK	2.64699	6.5614	1.30965	5.47381	5e-05	0.00026409	yes
EGR3	EGR3	EGR3	chr8:22687660-22693302	WT	KO1	OK	0.355751	0.881371	1.30888	3.30774	5e-05	0.00026409	yes
FHIT	FHIT	FHIT	chr3:59747277-61251461	WT	KO1	OK	0.24559	0.607413	1.30642	2.52524	5e-05	0.00026409	yes
LINC01433	LINC01433	LINC01433	chr20:4193089-4195953	WT	KO1	OK	5.0551	12.4493	1.30025	3.89522	5e-05	0.00026409	yes
SMTNL1	SMTNL1	SMTNL1	chr11:57542640-57550274	WT	KO1	OK	3.49919	8.61697	1.30016	4.53561	5e-05	0.00026409	yes
KIRREL	KIRREL	KIRREL	chr1:157993272-158100262	WT	KO1	OK	8.84599	21.7609	1.29864	5.8138	5e-05	0.00026409	yes
MAP2	MAP2	MAP2	chr2:209424046-209734110	WT	KO1	OK	4.02488	9.8963	1.29794	5.06189	5e-05	0.00026409	yes
ARTN	ARTN	ARTN	chr1:43933319-43937240	WT	KO1	OK	0.436126	1.07154	1.29687	2.3444	5e-05	0.00026409	yes
MMAA	MMAA	MMAA	chr4:145619387-145660035	WT	KO1	OK	0.653625	1.59929	1.29089	4.29848	5e-05	0.00026409	yes
FAM111B	FAM111B	FAM111B	chr11:59107184-59127416	WT	KO1	OK	3.7256	9.11568	1.29088	5.04021	5e-05	0.00026409	yes
IL11	IL11	IL11	chr19:55364381-55370463	WT	KO1	OK	23.5478	57.6162	1.29088	5.67176	5e-05	0.00026409	yes
BARX1	BARX1	BARX1	chr9:93951626-93955326	WT	KO1	OK	1.17726	2.87582	1.28855	3.43999	5e-05	0.00026409	yes
ADGRF4	ADGRF4	ADGRF4	chr6:47698552-47722021	WT	KO1	OK	3.27366	7.98772	1.28688	4.98877	5e-05	0.00026409	yes
IGFBP7	IGFBP7	IGFBP7	chr4:56978639-57205299	WT	KO1	OK	53.8891	131.453	1.28648	2.92946	5e-05	0.00026409	yes
MAP6	MAP6	MAP6	chr11:75586917-75668434	WT	KO1	OK	0.65122	1.58737	1.28542	3.56493	5e-05	0.00026409	yes
PCDHGC3	PCDHGC3	PCDHGC3	chr5:141330684-141512981	WT	KO1	OK	5.48999	13.3819	1.28541	2.92461	5e-05	0.00026409	yes
SCN1B	SCN1B	SCN1B	chr19:35030687-35040449	WT	KO1	OK	7.03128	17.1321	1.28484	4.70135	5e-05	0.00026409	yes
ENDOD1	ENDOD1	ENDOD1	chr11:95089809-95132651	WT	KO1	OK	9.10263	22.1703	1.28427	5.5933	5e-05	0.00026409	yes
BTN3A3	BTN3A3	BTN3A3	chr6:26440471-26453415	WT	KO1	OK	9.12248	22.212	1.28384	5.18317	5e-05	0.00026409	yes
FAM71F2	FAM71F2	FAM71F2	chr7:128672265-128687872	WT	KO1	OK	0.615256	1.49771	1.2835	4.16864	5e-05	0.00026409	yes
MILR1	MILR1	MILR1	chr17:64449114-64468643	WT	KO1	OK	7.83815	19.0603	1.28199	4.88294	5e-05	0.00026409	yes
ZNF862	ZNF862	ZNF862	chr7:149838419-149867479	WT	KO1	OK	0.824883	2.00581	1.28192	4.56177	5e-05	0.00026409	yes
ZNF516	ZNF516	ZNF516	chr18:76357681-76495190	WT	KO1	OK	0.496477	1.2029	1.27671	4.30453	5e-05	0.00026409	yes
MT2A	MT2A	MT2A	chr16:56608565-56609497	WT	KO1	OK	1280.18	3087.77	1.27021	5.55312	5e-05	0.00026409	yes
SLC12A8	SLC12A8	SLC12A8	chr3:125082635-125212765	WT	KO1	OK	0.468535	1.12899	1.2688	3.39085	5e-05	0.00026409	yes
APOL3	APOL3	APOL3	chr22:36140322-36166177	WT	KO1	OK	10.7915	25.9739	1.26718	5.28998	5e-05	0.00026409	yes
LOC155060	LOC155060	LOC155060	chr7:149285280-149297312	WT	KO1	OK	2.2854	5.49912	1.26675	4.65999	5e-05	0.00026409	yes
RANBP17	RANBP17	RANBP17	chr5:170861881-171300015	WT	KO1	OK	1.62453	3.89909	1.26311	4.67919	5e-05	0.00026409	yes
PLPP3	PLPP3	PLPP3	chr1:56494746-56579584	WT	KO1	OK	21.7402	52.0311	1.25901	5.59293	5e-05	0.00026409	yes
MUC1	MUC1	MUC1	chr1:155185823-155192915	WT	KO1	OK	21.4789	51.3995	1.25883	4.95638	5e-05	0.00026409	yes
ST6GAL1	ST6GAL1	ST6GAL1	chr3:186930525-187078553	WT	KO1	OK	0.966298	2.31119	1.25809	4.16596	5e-05	0.00026409	yes
OTUD1	OTUD1	OTUD1	chr10:23439268-23442381	WT	KO1	OK	9.36488	22.3454	1.25464	5.3019	5e-05	0.00026409	yes
UNC5B	UNC5B	UNC5B	chr10:71212534-71302878	WT	KO1	OK	0.349654	0.834067	1.25424	3.77842	5e-05	0.00026409	yes
SOX2	SOX2	SOX2	chr3:181056679-181742225	WT	KO1	OK	0.53799	1.28316	1.25405	2.98531	5e-05	0.00026409	yes
NOD2	NOD2	NOD2	chr16:50697138-50733077	WT	KO1	OK	0.370811	0.884384	1.25399	3.36202	5e-05	0.00026409	yes
SLC6A17	SLC6A17	SLC6A17	chr1:110150509-110202201	WT	KO1	OK	0.526327	1.25413	1.25265	4.04399	5e-05	0.00026409	yes
IFFO1	IFFO1	IFFO1	chr12:6539527-6556083	WT	KO1	OK	0.396685	0.944997	1.25232	2.77835	5e-05	0.00026409	yes
HMGN2	HMGN2	HMGN2	chr1:26472410-26476642	WT	KO1	OK	91.999	218.919	1.25071	5.61803	5e-05	0.00026409	yes
CD24	CD24	CD24	chr6:106969830-106976855	WT	KO1	OK	150.198	356.696	1.24783	5.54827	5e-05	0.00026409	yes
FUT8	FUT8	FUT8	chr14:65410591-65744121	WT	KO1	OK	5.26997	12.5134	1.2476	5.17633	5e-05	0.00026409	yes
ST3GAL5	ST3GAL5	ST3GAL5	chr2:85839147-85889034	WT	KO1	OK	56.1801	133.233	1.24582	5.6325	5e-05	0.00026409	yes
RGMB	RGMB	RGMB	chr5:98769294-98796494	WT	KO1	OK	3.51495	8.33539	1.24575	4.97036	5e-05	0.00026409	yes
MIRLET7BHG	MIRLET7BHG	MIRLET7BHG	chr22:46085996-46113928	WT	KO1	OK	0.680016	1.61246	1.24562	3.89227	5e-05	0.00026409	yes
SAMHD1	SAMHD1	SAMHD1	chr20:36876120-36951843	WT	KO1	OK	52.471	124.142	1.2424	5.50704	5e-05	0.00026409	yes
DKK3	DKK3	DKK3	chr11:11962995-12009370	WT	KO1	OK	15.2017	35.9497	1.24175	5.2618	5e-05	0.00026409	yes
UST	UST	UST	chr6:148747134-149076990	WT	KO1	OK	1.16352	2.74975	1.2408	4.08955	5e-05	0.00026409	yes
GTF2IRD2B	GTF2IRD2B	GTF2IRD2B	chr7:75092555-75149817	WT	KO1	OK	0.806584	1.9059	1.24057	3.86334	5e-05	0.00026409	yes
S1PR2	S1PR2	S1PR2	chr19:10221432-10231272	WT	KO1	OK	1.02199	2.40535	1.23486	4.03164	5e-05	0.00026409	yes
CORO2B	CORO2B	CORO2B	chr15:68518372-68727805	WT	KO1	OK	0.861323	2.02447	1.23291	3.77112	5e-05	0.00026409	yes
MST1	MST1	MST1	chr3:49683946-49688763	WT	KO1	OK	0.638065	1.49846	1.2317	3.17625	5e-05	0.00026409	yes
STMN1	STMN1	STMN1	chr1:25884185-25906877	WT	KO1	OK	56.1232	131.759	1.23123	5.50015	5e-05	0.00026409	yes
ZBED5	ZBED5	ZBED5	chr11:10852703-10858073	WT	KO1	OK	29.9095	70.0077	1.22691	5.50925	5e-05	0.00026409	yes
MAML2	MAML2	MAML2	chr11:95976592-96343180	WT	KO1	OK	1.77715	4.1549	1.22525	4.83919	5e-05	0.00026409	yes
ZNF443	ZNF443	ZNF443	chr19:12429705-12441112	WT	KO1	OK	0.402454	0.940891	1.22521	2.86938	5e-05	0.00026409	yes
CARD16	CARD16	CARD16	chr11:105041325-105045324	WT	KO1	OK	2.92822	6.83064	1.222	3.2546	5e-05	0.00026409	yes
NHS	NHS	NHS	chrX:17375419-17735993	WT	KO1	OK	1.88559	4.39547	1.221	4.90965	5e-05	0.00026409	yes
LIPG	LIPG	LIPG	chr18:49562030-49592908	WT	KO1	OK	1.75265	4.08152	1.21956	4.45923	5e-05	0.00026409	yes
NFIX	NFIX	NFIX	chr19:12995769-13098796	WT	KO1	OK	2.09647	4.88124	1.21929	4.84356	5e-05	0.00026409	yes
NFE2L3	NFE2L3	NFE2L3	chr7:26152226-26187136	WT	KO1	OK	17.6782	41.0158	1.21421	5.40504	5e-05	0.00026409	yes
PPP2R3A	PPP2R3A	PPP2R3A	chr3:135965672-136147910	WT	KO1	OK	0.907149	2.10399	1.21372	4.03106	5e-05	0.00026409	yes
EGF	EGF	EGF	chr4:109912883-110013079	WT	KO1	OK	0.254052	0.588435	1.21176	2.87755	5e-05	0.00026409	yes
EFNB3	EFNB3	EFNB3	chr17:7705201-7711375	WT	KO1	OK	0.655854	1.51903	1.2117	3.49789	5e-05	0.00026409	yes
AOX1	AOX1	AOX1	chr2:200586007-200671494	WT	KO1	OK	0.317227	0.733004	1.2083	3.19664	5e-05	0.00026409	yes
STC2	STC2	STC2	chr5:173314722-173329503	WT	KO1	OK	4.076	9.38056	1.20252	5.02082	5e-05	0.00026409	yes
ABLIM3	ABLIM3	ABLIM3	chr5:149141482-149260438	WT	KO1	OK	3.18978	7.32576	1.19952	4.75342	5e-05	0.00026409	yes
RNF182	RNF182	RNF182	chr6:13924445-13980009	WT	KO1	OK	0.584743	1.34036	1.19675	3.21518	5e-05	0.00026409	yes
PTPN14	PTPN14	PTPN14	chr1:214348695-214551681	WT	KO1	OK	2.41826	5.53944	1.19577	5.13995	5e-05	0.00026409	yes
ZNF675	ZNF675	ZNF675	chr19:23652905-23687215	WT	KO1	OK	1.40573	3.21049	1.19148	3.69926	5e-05	0.00026409	yes
ZNF627	ZNF627	ZNF627	chr19:11597419-11619159	WT	KO1	OK	2.78007	6.33893	1.18912	4.41814	5e-05	0.00026409	yes
HOXA5	HOXA5	HOXA5	chr7:27140363-27156677	WT	KO1	OK	4.12689	9.39814	1.18732	3.55904	5e-05	0.00026409	yes
BDKRB2	BDKRB2	BDKRB2	chr14:96204797-96244329	WT	KO1	OK	5.80556	13.2108	1.18621	4.99803	5e-05	0.00026409	yes
ZBTB18	ZBTB18	ZBTB18	chr1:244048938-244057478	WT	KO1	OK	4.65991	10.5979	1.1854	4.81436	5e-05	0.00026409	yes
PRKY	PRKY	PRKY	chrY:7273971-7381547	WT	KO1	OK	0.611207	1.38837	1.18366	3.99568	5e-05	0.00026409	yes
CDC42EP3	CDC42EP3	CDC42EP3	chr2:37641881-37672535	WT	KO1	OK	12.0382	27.2837	1.18042	5.2658	5e-05	0.00026409	yes
MSX2	MSX2	MSX2	chr5:174724571-174730899	WT	KO1	OK	2.12784	4.8178	1.17899	3.95801	5e-05	0.00026409	yes
LMNB1	LMNB1	LMNB1	chr5:126776622-126837020	WT	KO1	OK	19.7028	44.5654	1.17752	5.09055	5e-05	0.00026409	yes
CCL17	CCL17	CCL17	chr16:57404766-57416062	WT	KO1	OK	6.67325	15.0736	1.17556	3.5846	5e-05	0.00026409	yes
PSMB10	PSMB10	PSMB10	chr16:67934503-67936877	WT	KO1	OK	107.607	242.754	1.17372	5.22549	5e-05	0.00026409	yes
ANKRD29	ANKRD29	ANKRD29	chr18:23598925-23662885	WT	KO1	OK	3.41262	7.67763	1.16978	4.57813	5e-05	0.00026409	yes
SYT12	SYT12	SYT12	chr11:67022718-67050863	WT	KO1	OK	1.06354	2.39236	1.16957	3.7306	5e-05	0.00026409	yes
KATNAL2	KATNAL2	KATNAL2	chr18:46946823-47102243	WT	KO1	OK	0.43974	0.988922	1.16921	2.85737	5e-05	0.00026409	yes
FBXW10	FBXW10	FBXW10	chr17:18744012-18779349	WT	KO1	OK	0.965292	2.16688	1.16658	3.67004	5e-05	0.00026409	yes
THEMIS2	THEMIS2	THEMIS2	chr1:27872542-27886685	WT	KO1	OK	20.5082	46.006	1.16562	4.10957	5e-05	0.00026409	yes
DPYSL5	DPYSL5	DPYSL5	chr2:26848100-26950351	WT	KO1	OK	0.697096	1.56071	1.16277	3.75769	5e-05	0.00026409	yes
ALDH7A1	ALDH7A1	ALDH7A1	chr5:126541840-126595390	WT	KO1	OK	13.09	29.3042	1.16265	5.17386	5e-05	0.00026409	yes
TPM1	TPM1	TPM1	chr15:63042638-63071914	WT	KO1	OK	192.952	431.391	1.16076	5.02756	5e-05	0.00026409	yes
TMEM59L	TMEM59L	TMEM59L	chr19:18612871-18621039	WT	KO1	OK	2.00968	4.48924	1.15951	3.58158	5e-05	0.00026409	yes
MYPN	MYPN	MYPN	chr10:68106116-68212016	WT	KO1	OK	0.231098	0.515801	1.15831	2.6797	5e-05	0.00026409	yes
RHOBTB3	RHOBTB3	RHOBTB3	chr5:95731145-95796367	WT	KO1	OK	2.8363	6.31783	1.15542	4.65941	5e-05	0.00026409	yes
ZNF350	ZNF350	ZNF350	chr19:51949133-51986826	WT	KO1	OK	1.91459	4.26164	1.15437	3.86318	5e-05	0.00026409	yes
HLA-H	HLA-H	HLA-H	chr6_GL000256v2_alt:1187595-1190898	WT	KO1	OK	3.51607	7.8261	1.15433	3.94662	5e-05	0.00026409	yes
AKAP2	AKAP2	AKAP2	chr9:109640787-110172511	WT	KO1	OK	10.9396	24.3279	1.15306	5.15431	5e-05	0.00026409	yes
PTGS1	PTGS1	PTGS1	chr9:122370529-122395703	WT	KO1	OK	0.288465	0.640786	1.15145	2.72941	5e-05	0.00026409	yes
SRGN	SRGN	SRGN	chr10:69087445-69104811	WT	KO1	OK	110.574	245.497	1.1507	5.14073	5e-05	0.00026409	yes
SEPT3	SEPT3	SEPT3	chr22:41976926-41998221	WT	KO1	OK	0.46245	1.0258	1.14938	2.73749	5e-05	0.00026409	yes
DPP4	DPP4	DPP4	chr2:161992244-162074542	WT	KO1	OK	0.889234	1.97054	1.14796	3.68853	5e-05	0.00026409	yes
MYLK	MYLK	MYLK	chr3:123585512-123884302	WT	KO1	OK	3.04035	6.73596	1.14765	3.36322	5e-05	0.00026409	yes
DSE	DSE	DSE	chr6:116254151-116438291	WT	KO1	OK	4.93417	10.9233	1.14653	2.86865	5e-05	0.00026409	yes
NPL	NPL	NPL	chr1:182789448-182830384	WT	KO1	OK	0.427609	0.946098	1.1457	2.51419	5e-05	0.00026409	yes
ZNF14	ZNF14	ZNF14	chr19:19710471-19733112	WT	KO1	OK	0.878558	1.9408	1.14345	3.43305	5e-05	0.00026409	yes
INPP4B	INPP4B	INPP4B	chr4:142028028-142846451	WT	KO1	OK	2.0496	4.52311	1.14198	4.25826	5e-05	0.00026409	yes
TNFSF13B	TNFSF13B	TNFSF13B	chr13:108269628-108308484	WT	KO1	OK	6.3175	13.9155	1.13927	4.65703	5e-05	0.00026409	yes
ZNF708	ZNF708	ZNF708	chr19:21291159-21329439	WT	KO1	OK	0.356628	0.785449	1.1391	2.74643	5e-05	0.00026409	yes
DAPK2	DAPK2	DAPK2	chr15:63907035-64046322	WT	KO1	OK	3.14261	6.91509	1.13778	4.24021	5e-05	0.00026409	yes
CCT6B	CCT6B	CCT6B	chr17:34927858-34961509	WT	KO1	OK	1.84547	4.05609	1.1361	3.54103	5e-05	0.00026409	yes
RIBC2	RIBC2	RIBC2	chr22:45413690-45432422	WT	KO1	OK	1.25824	2.76353	1.1351	2.98586	5e-05	0.00026409	yes
SLC2A4RG	SLC2A4RG	SLC2A4RG	chr20:63739857-63805503	WT	KO1	OK	13.9793	30.6422	1.13223	4.43859	5e-05	0.00026409	yes
RASGRP1	RASGRP1	RASGRP1	chr15:38488097-38564806	WT	KO1	OK	0.454269	0.995623	1.13205	3.1605	5e-05	0.00026409	yes
CES2	CES2	CES2	chr16:66934443-66945091	WT	KO1	OK	14.1826	31.0595	1.13092	4.99732	5e-05	0.00026409	yes
FAM20C	FAM20C	FAM20C	chr7_KI270899v1_alt:185289-188053	WT	KO1	OK	8.34414	18.2107	1.12595	4.68992	5e-05	0.00026409	yes
KCNJ15	KCNJ15	KCNJ15	chr21:38229914-38301824	WT	KO1	OK	0.335106	0.73125	1.12575	2.15494	5e-05	0.00026409	yes
KRR1	KRR1	KRR1	chr12:75480732-75511638	WT	KO1	OK	17.5162	38.2117	1.12533	2.91058	5e-05	0.00026409	yes
AR	AR	AR	chrX:67544031-67730619	WT	KO1	OK	2.77202	6.02858	1.12088	4.66452	5e-05	0.00026409	yes
IFITM2	IFITM2	IFITM2	chr11:308106-309410	WT	KO1	OK	374.928	814.127	1.11864	4.87414	5e-05	0.00026409	yes
HAVCR1	HAVCR1	HAVCR1	chr5:157029412-157059119	WT	KO1	OK	39.4047	85.5177	1.11786	4.86467	5e-05	0.00026409	yes
FBXO32	FBXO32	FBXO32	chr8:123497886-123541253	WT	KO1	OK	6.40466	13.884	1.11623	4.909	5e-05	0.00026409	yes
CFHR3	CFHR3	CFHR3	chr1:196774799-196794073	WT	KO1	OK	1.59343	3.45386	1.11608	3.17036	5e-05	0.00026409	yes
ZNF354B	ZNF354B	ZNF354B	chr5:178859952-178884423	WT	KO1	OK	2.2383	4.84951	1.11544	3.78963	5e-05	0.00026409	yes
STRIP2	STRIP2	STRIP2	chr7:129434432-129488398	WT	KO1	OK	10.7166	23.1892	1.1136	4.56643	5e-05	0.00026409	yes
FOXL2NB	FOXL2NB	FOXL2NB	chr3:138947233-138953988	WT	KO1	OK	0.567879	1.22243	1.1061	3.27475	5e-05	0.00026409	yes
MEG3	MEG3	MEG3	chr14:100826107-100861023	WT	KO1	OK	16.1375	34.7066	1.1048	4.4304	5e-05	0.00026409	yes
NRP1	NRP1	NRP1	chr10:33177490-33334905	WT	KO1	OK	63.3905	136.154	1.1029	4.82242	5e-05	0.00026409	yes
ZNF10	ZNF10	ZNF10	chr12:133130627-133159463	WT	KO1	OK	0.320949	0.688537	1.10119	2.7978	5e-05	0.00026409	yes
ZFP36L1	ZFP36L1	ZFP36L1	chr14:68787654-68796243	WT	KO1	OK	98.548	211.382	1.10095	4.92557	5e-05	0.00026409	yes
C5orf56	C5orf56	C5orf56	chr5:132410772-132476044	WT	KO1	OK	9.80732	20.9809	1.09714	3.90202	5e-05	0.00026409	yes
ZNF256	ZNF256	ZNF256	chr19:57940832-57947709	WT	KO1	OK	0.504504	1.07607	1.09284	2.53374	5e-05	0.00026409	yes
ARHGEF40	ARHGEF40	ARHGEF40	chr14:21016762-21104704	WT	KO1	OK	6.37371	13.5772	1.09098	3.79666	5e-05	0.00026409	yes
NPC2	NPC2	NPC2	chr14:74479939-74493381	WT	KO1	OK	137.703	292.858	1.08864	4.83996	5e-05	0.00026409	yes
MR1	MR1	MR1	chr1:181033424-181061938	WT	KO1	OK	2.36891	5.03749	1.08848	4.48203	5e-05	0.00026409	yes
SLC22A15	SLC22A15	SLC22A15	chr1:115919375-116070054	WT	KO1	OK	0.338407	0.719396	1.08803	2.8825	5e-05	0.00026409	yes
TMEM150C	TMEM150C	TMEM150C	chr4:82484450-82561973	WT	KO1	OK	0.632885	1.3416	1.08394	2.53635	5e-05	0.00026409	yes
NOTUM	NOTUM	NOTUM	chr17:81952506-81961181	WT	KO1	OK	0.603767	1.27808	1.08192	2.64105	5e-05	0.00026409	yes
CAPN3	CAPN3	CAPN3	chr15:42359499-42412317	WT	KO1	OK	1.85665	3.91495	1.07629	2.89436	5e-05	0.00026409	yes
ZSWIM6	ZSWIM6	ZSWIM6	chr5:61332272-61546172	WT	KO1	OK	7.15602	15.0867	1.07605	4.67317	5e-05	0.00026409	yes
CNKSR2	CNKSR2	CNKSR2	chrX:21374417-21654695	WT	KO1	OK	1.60853	3.38843	1.07487	4.02325	5e-05	0.00026409	yes
SUSD1	SUSD1	SUSD1	chr9:112040780-112175297	WT	KO1	OK	9.58584	20.1622	1.07267	4.5482	5e-05	0.00026409	yes
MDGA1	MDGA1	MDGA1	chr6:37632507-37697990	WT	KO1	OK	3.26738	6.8688	1.07192	4.55753	5e-05	0.00026409	yes
RGS2	RGS2	RGS2	chr1:192809038-192812277	WT	KO1	OK	32.0097	67.2462	1.07094	4.6374	5e-05	0.00026409	yes
LMO2	LMO2	LMO2	chr11:33858575-33892289	WT	KO1	OK	3.67839	7.71618	1.06881	3.73617	5e-05	0.00026409	yes
G3BP1	G3BP1	G3BP1	chr5:151769792-151805354	WT	KO1	OK	58.8118	123.248	1.06739	4.80599	5e-05	0.00026409	yes
MYLIP	MYLIP	MYLIP	chr6:16129085-16148247	WT	KO1	OK	2.32739	4.87413	1.06643	3.85816	5e-05	0.00026409	yes
BANK1	BANK1	BANK1	chr4:101790606-102074812	WT	KO1	OK	1.54315	3.22737	1.06449	3.61087	5e-05	0.00026409	yes
LINC00525	LINC00525	LINC00525	chr7:47761475-47766772	WT	KO1	OK	0.988002	2.06626	1.06444	2.4285	5e-05	0.00026409	yes
SLC44A2	SLC44A2	SLC44A2	chr19:10602444-10644559	WT	KO1	OK	3.45777	7.22358	1.06287	4.15337	5e-05	0.00026409	yes
LAP3	LAP3	LAP3	chr4:17577303-17607967	WT	KO1	OK	202.394	422.413	1.06149	4.68206	5e-05	0.00026409	yes
MORC4	MORC4	MORC4	chrX:106940733-107000244	WT	KO1	OK	37.9323	79.1506	1.06117	4.79574	5e-05	0.00026409	yes
TBX3	TBX3	TBX3	chr12:114670253-114684164	WT	KO1	OK	4.8738	10.1491	1.05823	4.43407	5e-05	0.00026409	yes
SHC2	SHC2	SHC2	chr19:416582-460996	WT	KO1	OK	0.704363	1.4644	1.05592	2.82649	5e-05	0.00026409	yes
FEM1C	FEM1C	FEM1C	chr5:115520910-115544894	WT	KO1	OK	4.32522	8.98331	1.05447	4.41611	5e-05	0.00026409	yes
PARP3	PARP3	PARP3	chr3:51942304-51948867	WT	KO1	OK	11.9694	24.8341	1.05297	4.49108	5e-05	0.00026409	yes
TLE6	TLE6	TLE6	chr19:2977537-2995184	WT	KO1	OK	0.845156	1.75289	1.05244	2.51067	5e-05	0.00026409	yes
EGR1	EGR1	EGR1	chr5:138465491-138469315	WT	KO1	OK	52.1457	108.136	1.05222	4.68628	5e-05	0.00026409	yes
NADK2	NADK2	NADK2	chr5:36192588-36242279	WT	KO1	OK	3.83711	7.95119	1.05115	4.1717	5e-05	0.00026409	yes
EIF4E3	EIF4E3	EIF4E3	chr3:71679288-71755177	WT	KO1	OK	0.843678	1.74661	1.04979	3.5917	5e-05	0.00026409	yes
MGAT5B	MGAT5B	MGAT5B	chr17:76868715-76950389	WT	KO1	OK	11.6588	24.1341	1.04965	4.59238	5e-05	0.00026409	yes
HLA-A	HLA-A	HLA-A	chr6_GL000256v2_alt:1240283-1243714	WT	KO1	OK	16.7246	34.6081	1.04914	4.4147	5e-05	0.00026409	yes
CLIC4	CLIC4	CLIC4	chr1:24745268-24844324	WT	KO1	OK	19.3278	39.9422	1.04723	4.63585	5e-05	0.00026409	yes
SLC9A7	SLC9A7	SLC9A7	chrX:46599250-46759172	WT	KO1	OK	5.76234	11.9034	1.04665	4.66404	5e-05	0.00026409	yes
EVL	EVL	EVL	chr14:100065413-100144236	WT	KO1	OK	8.88204	18.3468	1.04656	4.1949	5e-05	0.00026409	yes
ENC1	ENC1	ENC1	chr5:74627405-74776912	WT	KO1	OK	25.946	53.5767	1.04609	2.62891	5e-05	0.00026409	yes
PDE8B	PDE8B	PDE8B	chr5:77210880-77428255	WT	KO1	OK	4.44248	9.16814	1.04527	4.30527	5e-05	0.00026409	yes
PTGES	PTGES	PTGES	chr9:129738335-129753065	WT	KO1	OK	111.506	230.119	1.04526	4.67498	5e-05	0.00026409	yes
LINC01004	LINC01004	LINC01004	chr7:104981746-104991165	WT	KO1	OK	0.555507	1.14504	1.04353	3.62676	5e-05	0.00026409	yes
DNAJC12	DNAJC12	DNAJC12	chr10:67796668-67838179	WT	KO1	OK	66.8147	137.449	1.04066	4.54539	5e-05	0.00026409	yes
TPCN1	TPCN1	TPCN1	chr12:113221437-113298584	WT	KO1	OK	9.69878	19.8837	1.03571	4.56175	5e-05	0.00026409	yes
TFEB	TFEB	TFEB	chr6:41683977-41736259	WT	KO1	OK	1.92951	3.95373	1.03497	3.32821	5e-05	0.00026409	yes
DFNA5	DFNA5	DFNA5	chr7:24698354-24758020	WT	KO1	OK	20.0099	40.9462	1.03301	4.51127	5e-05	0.00026409	yes
BTC	BTC	BTC	chr4:74744759-74794686	WT	KO1	OK	3.21733	6.58261	1.0328	3.85047	5e-05	0.00026409	yes
MX2	MX2	MX2	chr21:41362022-41408942	WT	KO1	OK	14.1115	28.8627	1.03234	4.48973	5e-05	0.00026409	yes
PARP10	PARP10	PARP10	chr8:143977151-143986471	WT	KO1	OK	26.0407	53.1362	1.02893	4.59821	5e-05	0.00026409	yes
SMAD1	SMAD1	SMAD1	chr4:145481798-145559173	WT	KO1	OK	3.90814	7.97039	1.02817	3.72752	5e-05	0.00026409	yes
LOC729970	LOC729970	LOC729970	chr1:94928027-94963270	WT	KO1	OK	2.20334	4.49232	1.02777	2.78861	5e-05	0.00026409	yes
SMOC1	SMOC1	SMOC1	chr14:69879396-70032366	WT	KO1	OK	11.449	23.3343	1.02723	4.43901	5e-05	0.00026409	yes
BNC2	BNC2	BNC2	chr9:16409502-16870788	WT	KO1	OK	0.719047	1.46496	1.0267	3.9221	5e-05	0.00026409	yes
SIAE	SIAE	SIAE	chr11:124622845-124694791	WT	KO1	OK	4.86177	9.89789	1.02564	2.39044	5e-05	0.00026409	yes
TPRA1	TPRA1	TPRA1	chr3:127573063-127590759	WT	KO1	OK	13.8104	28.109	1.02527	4.29367	5e-05	0.00026409	yes
JMY	JMY	JMY	chr5:79236101-79327215	WT	KO1	OK	1.71409	3.4884	1.02512	4.07132	5e-05	0.00026409	yes
TMEM229B	TMEM229B	TMEM229B	chr14:67470265-67515304	WT	KO1	OK	0.779399	1.58141	1.02077	3.19368	5e-05	0.00026409	yes
DISP1	DISP1	DISP1	chr1:222815088-223005995	WT	KO1	OK	1.0024	2.03204	1.01948	3.48295	5e-05	0.00026409	yes
EYA4	EYA4	EYA4	chr6:133241356-133889006	WT	KO1	OK	5.95664	12.0571	1.01731	4.25798	5e-05	0.00026409	yes
ZNF92	ZNF92	ZNF92	chr7:65373798-65401135	WT	KO1	OK	2.10755	4.26441	1.01678	3.60375	5e-05	0.00026409	yes
PXK	PXK	PXK	chr3:58332889-58426127	WT	KO1	OK	7.24887	14.662	1.01626	4.16621	5e-05	0.00026409	yes
SLC25A28	SLC25A28	SLC25A28	chr10:99610517-99620464	WT	KO1	OK	41.4705	83.8006	1.01487	4.45046	5e-05	0.00026409	yes
PPM1H	PPM1H	PPM1H	chr12:62643983-62934885	WT	KO1	OK	3.8407	7.75842	1.0144	4.25047	5e-05	0.00026409	yes
FAM126A	FAM126A	FAM126A	chr7:22941258-23014151	WT	KO1	OK	3.39417	6.85456	1.014	4.18972	5e-05	0.00026409	yes
SLC36A1	SLC36A1	SLC36A1	chr5:151436991-151492381	WT	KO1	OK	4.36417	8.80611	1.0128	3.63478	5e-05	0.00026409	yes
ELOVL4	ELOVL4	ELOVL4	chr6:79914811-79947598	WT	KO1	OK	0.515915	1.04037	1.01189	2.62999	5e-05	0.00026409	yes
GPCPD1	GPCPD1	GPCPD1	chr20:5544433-5611026	WT	KO1	OK	17.9734	36.2402	1.01172	4.53531	5e-05	0.00026409	yes
DPY19L2P2	DPY19L2P2	DPY19L2P2	chr7_KI270806v1_alt:1442-67083	WT	KO1	OK	0.752997	1.51684	1.01035	3.08512	5e-05	0.00026409	yes
ELOVL7	ELOVL7	ELOVL7	chr5:60751788-60844274	WT	KO1	OK	9.13023	18.3756	1.00907	4.29484	5e-05	0.00026409	yes
TENM3	TENM3	TENM3	chr4:182243430-182803024	WT	KO1	OK	0.588468	1.18247	1.00677	3.58379	5e-05	0.00026409	yes
C3orf58	C3orf58	C3orf58	chr3:143971797-143992368	WT	KO1	OK	1.79676	3.61023	1.0067	3.26511	5e-05	0.00026409	yes
CTSF	CTSF	CTSF	chr11:66563463-66568576	WT	KO1	OK	19.5299	39.2373	1.00654	4.33399	5e-05	0.00026409	yes
SERPINE1	SERPINE1	SERPINE1	chr7:101127088-101139266	WT	KO1	OK	142.66	286.331	1.00511	4.43302	5e-05	0.00026409	yes
GCH1	GCH1	GCH1	chr14:54842005-54902824	WT	KO1	OK	8.07372	16.1944	1.00419	3.96914	5e-05	0.00026409	yes
PER3	PER3	PER3	chr1:7784428-7845180	WT	KO1	OK	0.655012	1.31065	1.00069	3.29577	5e-05	0.00026409	yes
CDCP1	CDCP1	CDCP1	chr3:45082273-45146422	WT	KO1	OK	7.21422	14.4151	0.998669	4.30437	5e-05	0.00026409	yes
PPM1K	PPM1K	PPM1K	chr4:88257608-88284831	WT	KO1	OK	4.64687	9.28289	0.998313	4.26728	5e-05	0.00026409	yes
LPXN	LPXN	LPXN	chr11:58526870-58578239	WT	KO1	OK	2.77525	5.54224	0.997852	3.39596	5e-05	0.00026409	yes
C15orf48	C15orf48	C15orf48	chr15:45430528-45433449	WT	KO1	OK	70.6813	141.107	0.99739	4.27922	5e-05	0.00026409	yes
DHRS3	DHRS3	DHRS3	chr1:12567909-12617731	WT	KO1	OK	95.7418	191.043	0.996674	4.34312	5e-05	0.00026409	yes
KLF9	KLF9	KLF9	chr9:70384596-70414657	WT	KO1	OK	3.0459	6.06552	0.993762	4.00798	5e-05	0.00026409	yes
C9orf40	C9orf40	C9orf40	chr9:74946582-74952886	WT	KO1	OK	1.58814	3.16179	0.993408	3.17775	5e-05	0.00026409	yes
FAM111A	FAM111A	FAM111A	chr11:59133972-59155038	WT	KO1	OK	13.1523	26.1737	0.992801	4.22358	5e-05	0.00026409	yes
SMPD1	SMPD1	SMPD1	chr11:6390413-6394998	WT	KO1	OK	15.7234	31.2843	0.992523	4.1926	5e-05	0.00026409	yes
BICC1	BICC1	BICC1	chr10:58513143-58831437	WT	KO1	OK	15.7314	31.2831	0.99174	4.40165	5e-05	0.00026409	yes
LTBP2	LTBP2	LTBP2	chr14:74498182-74612331	WT	KO1	OK	3.49222	6.94227	0.991263	4.2353	5e-05	0.00026409	yes
ZC3H6	ZC3H6	ZC3H6	chr2:112275600-112340063	WT	KO1	OK	0.265229	0.527041	0.990679	3.0982	5e-05	0.00026409	yes
IFNGR1	IFNGR1	IFNGR1	chr6:137197483-137219430	WT	KO1	OK	34.7586	69.0258	0.989766	4.37477	5e-05	0.00026409	yes
MND1	MND1	MND1	chr4:153344648-153415095	WT	KO1	OK	6.85498	13.6014	0.988536	3.41526	5e-05	0.00026409	yes
C6orf141	C6orf141	C6orf141	chr6:49550399-49552095	WT	KO1	OK	5.90313	11.7109	0.988299	3.74684	5e-05	0.00026409	yes
HPSE	HPSE	HPSE	chr4:83292460-83335153	WT	KO1	OK	0.464859	0.920448	0.985541	2.80568	5e-05	0.00026409	yes
C14orf132	C14orf132	C14orf132	chr14:96039323-96093971	WT	KO1	OK	1.74377	3.45078	0.98471	2.89882	5e-05	0.00026409	yes
EFCAB13	EFCAB13	EFCAB13	chr17:47323960-47441311	WT	KO1	OK	0.595525	1.17691	0.982774	2.81611	5e-05	0.00026409	yes
CASC15	CASC15	CASC15	chr6:21666443-22194387	WT	KO1	OK	1.23166	2.4317	0.981362	2.82498	5e-05	0.00026409	yes
DECR1	DECR1	DECR1	chr8:90001351-90051999	WT	KO1	OK	46.1171	91.0085	0.9807	4.29236	5e-05	0.00026409	yes
PI4K2B	PI4K2B	PI4K2B	chr4:25234030-25279209	WT	KO1	OK	9.53457	18.7974	0.979295	4.18362	5e-05	0.00026409	yes
ASS1	ASS1	ASS1	chr9:130444706-130501274	WT	KO1	OK	31.6718	62.4032	0.978422	4.27838	5e-05	0.00026409	yes
DUBR	DUBR	DUBR	chr3:107240691-107326964	WT	KO1	OK	1.19336	2.34986	0.977546	3.06871	5e-05	0.00026409	yes
FBXL17	FBXL17	FBXL17	chr5:107859032-108382098	WT	KO1	OK	2.92325	5.74474	0.974668	3.91137	5e-05	0.00026409	yes
TIMD4	TIMD4	TIMD4	chr5:156919281-156963255	WT	KO1	OK	2.66506	5.22598	0.971531	2.9868	5e-05	0.00026409	yes
MIR503HG	MIR503HG	MIR503HG	chrX:134543376-134546711	WT	KO1	OK	3.45857	6.7781	0.970704	2.74399	5e-05	0.00026409	yes
L2HGDH	L2HGDH	L2HGDH	chr14:50242433-50312229	WT	KO1	OK	3.79759	7.4318	0.968629	4.04819	5e-05	0.00026409	yes
SLCO1B1	SLCO1B1	SLCO1B1	chr12:21131193-21239796	WT	KO1	OK	0.700198	1.36994	0.96828	2.65537	5e-05	0.00026409	yes
CMPK2	CMPK2	CMPK2	chr2:6840552-6866635	WT	KO1	OK	63.0043	123.167	0.967089	4.36082	5e-05	0.00026409	yes
TSPAN5	TSPAN5	TSPAN5	chr4:98470366-98658661	WT	KO1	OK	2.96078	5.78641	0.966692	3.69703	5e-05	0.00026409	yes
LOXL2	LOXL2	LOXL2	chr8:23296896-23404209	WT	KO1	OK	34.7688	67.8895	0.965394	4.29783	5e-05	0.00026409	yes
PEX11B	PEX11B	PEX11B	chr1:145911347-145918924	WT	KO1	OK	14.8152	28.8949	0.963738	4.00863	5e-05	0.00026409	yes
PDE4B	PDE4B	PDE4B	chr1:65792509-66374579	WT	KO1	OK	18.3576	35.7875	0.963082	4.26151	5e-05	0.00026409	yes
INSIG1	INSIG1	INSIG1	chr7:155297775-155310235	WT	KO1	OK	69.9369	136.318	0.962848	4.26415	5e-05	0.00026409	yes
ITGB6	ITGB6	ITGB6	chr2:160099665-160200313	WT	KO1	OK	0.321394	0.626216	0.962318	2.35164	5e-05	0.00026409	yes
ADARB1	ADARB1	ADARB1	chr21:45074577-45226563	WT	KO1	OK	0.880464	1.71525	0.962084	2.70006	5e-05	0.00026409	yes
GAS6	GAS6	GAS6	chr13:113815609-113864103	WT	KO1	OK	3.41937	6.65823	0.961408	3.49758	5e-05	0.00026409	yes
ZNF827	ZNF827	ZNF827	chr4:145757626-145938960	WT	KO1	OK	1.75033	3.40608	0.960486	3.81072	5e-05	0.00026409	yes
ASF1B	ASF1B	ASF1B	chr19:14119508-14136628	WT	KO1	OK	15.169	29.5174	0.960443	4.03413	5e-05	0.00026409	yes
ZMYND15	ZMYND15	ZMYND15	chr17:4740014-4746119	WT	KO1	OK	1.06952	2.08058	0.960025	2.78648	5e-05	0.00026409	yes
TMEM132A	TMEM132A	TMEM132A	chr11:60924440-60951785	WT	KO1	OK	44.7457	86.8438	0.956673	4.0879	5e-05	0.00026409	yes
TLR3	TLR3	TLR3	chr4:186069154-186085098	WT	KO1	OK	5.60662	10.8731	0.955557	3.84415	5e-05	0.00026409	yes
MEX3D	MEX3D	MEX3D	chr19:1554668-1568058	WT	KO1	OK	1.77706	3.44576	0.955335	3.19793	5e-05	0.00026409	yes
RGS3	RGS3	RGS3	chr9:113444728-113597743	WT	KO1	OK	13.6741	26.5108	0.955133	3.42706	5e-05	0.00026409	yes
TMEM268	TMEM268	TMEM268	chr9:114611425-114646423	WT	KO1	OK	5.08085	9.84301	0.954031	3.97048	5e-05	0.00026409	yes
HMGB2	HMGB2	HMGB2	chr4:173331375-173334444	WT	KO1	OK	32.2403	62.4427	0.953668	4.14479	5e-05	0.00026409	yes
PNRC2	PNRC2	PNRC2	chr1:23959810-23963459	WT	KO1	OK	24.535	47.4311	0.950991	4.20174	5e-05	0.00026409	yes
C14orf159	C14orf159	C14orf159	chr14:91114012-91225396	WT	KO1	OK	12.1424	23.4577	0.950014	3.83855	5e-05	0.00026409	yes
SIPA1L1	SIPA1L1	SIPA1L1	chr14:71529311-71741229	WT	KO1	OK	3.7951	7.31641	0.946996	4.07635	5e-05	0.00026409	yes
SLC25A29	SLC25A29	SLC25A29	chr14:100291110-100306547	WT	KO1	OK	8.36255	16.1213	0.946954	3.78913	5e-05	0.00026409	yes
SSBP3	SSBP3	SSBP3	chr1:54225430-54406395	WT	KO1	OK	6.14821	11.8431	0.945807	3.86757	5e-05	0.00026409	yes
DPYD	DPYD	DPYD	chr1:97077743-97921059	WT	KO1	OK	3.88114	7.47274	0.945157	3.66814	5e-05	0.00026409	yes
HSDL2	HSDL2	HSDL2	chr9:112379908-112472405	WT	KO1	OK	11.7262	22.565	0.944357	4.05952	5e-05	0.00026409	yes
FBXO4	FBXO4	FBXO4	chr5:41925251-41941570	WT	KO1	OK	5.32728	10.2506	0.944243	3.40728	5e-05	0.00026409	yes
APOL1	APOL1	APOL1	chr22:36253070-36267531	WT	KO1	OK	112.135	215.659	0.94351	4.19869	5e-05	0.00026409	yes
TNFRSF19	TNFRSF19	TNFRSF19	chr13:23570369-23676105	WT	KO1	OK	0.853138	1.63974	0.942615	2.93352	5e-05	0.00026409	yes
P2RX6	P2RX6	P2RX6	chr22:21015152-21028013	WT	KO1	OK	0.579212	1.11313	0.942457	2.22076	5e-05	0.00026409	yes
CYP4V2	CYP4V2	CYP4V2	chr4:186191519-186213463	WT	KO1	OK	2.53798	4.87683	0.942265	3.68162	5e-05	0.00026409	yes
PWWP2A	PWWP2A	PWWP2A	chr5:160075884-160119445	WT	KO1	OK	5.56702	10.6949	0.941945	3.8631	5e-05	0.00026409	yes
PXMP2	PXMP2	PXMP2	chr12:132687605-132704991	WT	KO1	OK	7.97246	15.2754	0.938111	3.32447	5e-05	0.00026409	yes
PRTFDC1	PRTFDC1	PRTFDC1	chr10:24848606-24952644	WT	KO1	OK	6.39021	12.2332	0.936862	3.66293	5e-05	0.00026409	yes
CENPH	CENPH	CENPH	chr5:69189547-69210357	WT	KO1	OK	8.2913	15.8671	0.936367	3.57387	5e-05	0.00026409	yes
MEX3B	MEX3B	MEX3B	chr15:82041777-82046143	WT	KO1	OK	0.962833	1.84194	0.935866	2.95912	5e-05	0.00026409	yes
LOC283028	LOC283028	LOC283028	chr10:42751185-42769621	WT	KO1	OK	1.32074	2.52542	0.93517	3.20537	5e-05	0.00026409	yes
DCBLD1	DCBLD1	DCBLD1	chr6:117482603-117602542	WT	KO1	OK	9.18227	17.5545	0.934922	2.46537	5e-05	0.00026409	yes
B2M	B2M	B2M	chr15_KI270849v1_alt:34835-41507	WT	KO1	OK	172.292	328.988	0.933183	4.20257	5e-05	0.00026409	yes
SCAMP1	SCAMP1	SCAMP1	chr5:78358763-78480739	WT	KO1	OK	6.12246	11.6788	0.931714	3.371	5e-05	0.00026409	yes
ZNF138	ZNF138	ZNF138	chr7:64794387-64853800	WT	KO1	OK	1.28484	2.44938	0.930822	2.81867	5e-05	0.00026409	yes
CLIP3	CLIP3	CLIP3	chr19:36014498-36054762	WT	KO1	OK	1.58612	3.02063	0.929345	2.4582	5e-05	0.00026409	yes
TLE4	TLE4	TLE4	chr9:79571772-79726881	WT	KO1	OK	5.69822	10.8513	0.929289	3.9384	5e-05	0.00026409	yes
AP1S2	AP1S2	AP1S2	chrX:15825805-15855014	WT	KO1	OK	3.75461	7.14775	0.928824	3.3999	5e-05	0.00026409	yes
LINC01355	LINC01355	LINC01355	chr1:23281308-23285518	WT	KO1	OK	0.517508	0.984769	0.928204	2.51948	5e-05	0.00026409	yes
LOC728730	LOC728730	LOC728730	chr2:39437415-39601344	WT	KO1	OK	1.52971	2.91056	0.928038	2.99107	5e-05	0.00026409	yes
DOCK4	DOCK4	DOCK4	chr7:111726107-112206407	WT	KO1	OK	3.42069	6.49418	0.92486	3.90581	5e-05	0.00026409	yes
FST	FST	FST	chr5:53480433-53486474	WT	KO1	OK	7.69882	14.6088	0.924131	3.6554	5e-05	0.00026409	yes
ZNF430	ZNF430	ZNF430	chr19:21020619-21060046	WT	KO1	OK	0.725519	1.37645	0.923864	2.79861	5e-05	0.00026409	yes
PLEKHA2	PLEKHA2	PLEKHA2	chr8:38901234-38973911	WT	KO1	OK	1.94209	3.67768	0.921186	3.5396	5e-05	0.00026409	yes
CXCL2	CXCL2	CXCL2	chr4:74097036-74099280	WT	KO1	OK	29.766	56.2902	0.919221	3.90857	5e-05	0.00026409	yes
MTCL1	MTCL1	MTCL1	chr18:8717370-8832777	WT	KO1	OK	6.32201	11.9129	0.914073	3.94886	5e-05	0.00026409	yes
NT5C3A	NT5C3A	NT5C3A	chr7:33014112-33062797	WT	KO1	OK	104.677	197.105	0.913027	4.08575	5e-05	0.00026409	yes
CIRBP	CIRBP	CIRBP	chr19:1267470-1274809	WT	KO1	OK	47.5037	89.4219	0.91259	3.81053	5e-05	0.00026409	yes
ZNF554	ZNF554	ZNF554	chr19:2819873-2836735	WT	KO1	OK	0.452483	0.850428	0.910324	2.42106	5e-05	0.00026409	yes
SIX1	SIX1	SIX1	chr14:60644698-60649437	WT	KO1	OK	10.2846	19.3101	0.908875	3.81492	5e-05	0.00026409	yes
CNN2	CNN2	CNN2	chr19:1026274-1039068	WT	KO1	OK	42.0626	78.9682	0.908734	4.05585	5e-05	0.00026409	yes
VWA5A	VWA5A	VWA5A	chr11:124115403-124146911	WT	KO1	OK	1.33153	2.49287	0.904723	2.59292	5e-05	0.00026409	yes
BEAN1	BEAN1	BEAN1	chr16:66427296-66495288	WT	KO1	OK	2.99775	5.6116	0.904534	3.33439	5e-05	0.00026409	yes
MMP2	MMP2	MMP2	chr16:55478829-55506691	WT	KO1	OK	1.54908	2.89625	0.902775	3.04825	5e-05	0.00026409	yes
PAM	PAM	PAM	chr5:102754782-103031104	WT	KO1	OK	6.68295	12.4878	0.901961	3.82075	5e-05	0.00026409	yes
LINC00641	LINC00641	LINC00641	chr14:21200078-21206900	WT	KO1	OK	3.3467	6.25316	0.901846	2.99693	5e-05	0.00026409	yes
FLT3LG	FLT3LG	FLT3LG	chr19:49474208-49486231	WT	KO1	OK	5.40797	10.1043	0.901806	2.93151	5e-05	0.00026409	yes
HEG1	HEG1	HEG1	chr3:124965709-125055958	WT	KO1	OK	5.47822	10.2247	0.900281	3.94266	5e-05	0.00026409	yes
MT1X	MT1X	MT1X	chr16:56682469-56684196	WT	KO1	OK	61.9519	115.592	0.899818	3.44393	5e-05	0.00026409	yes
OSBPL6	OSBPL6	OSBPL6	chr2:178194480-178399433	WT	KO1	OK	0.316692	0.590405	0.898625	2.46145	5e-05	0.00026409	yes
IL1RAP	IL1RAP	IL1RAP	chr3:190514050-190657197	WT	KO1	OK	3.50209	6.52792	0.898406	3.22675	5e-05	0.00026409	yes
AIM1	AIM1	AIM1	chr6:106511854-106570449	WT	KO1	OK	1.04367	1.94485	0.897993	3.30186	5e-05	0.00026409	yes
ARHGEF17	ARHGEF17	ARHGEF17	chr11:73308617-73369380	WT	KO1	OK	4.61867	8.60577	0.897827	3.87656	5e-05	0.00026409	yes
FHL3	FHL3	FHL3	chr1:37996769-38005515	WT	KO1	OK	7.14804	13.265	0.892004	3.35003	5e-05	0.00026409	yes
RELL1	RELL1	RELL1	chr4:37453929-37686377	WT	KO1	OK	2.71615	5.03891	0.89155	2.91312	5e-05	0.00026409	yes
POU6F1	POU6F1	POU6F1	chr12:51186935-51217693	WT	KO1	OK	0.598812	1.10914	0.889261	2.66626	5e-05	0.00026409	yes
FN1	FN1	FN1	chr2:215360439-215436070	WT	KO1	OK	186.995	346.297	0.889009	3.61102	5e-05	0.00026409	yes
SH3BGRL	SH3BGRL	SH3BGRL	chrX:81113700-81298547	WT	KO1	OK	25.5905	47.3818	0.888726	3.80954	5e-05	0.00026409	yes
ACSL4	ACSL4	ACSL4	chrX:109641329-109733403	WT	KO1	OK	24.8163	45.9417	0.888514	3.99971	5e-05	0.00026409	yes
NR3C1	NR3C1	NR3C1	chr5:143277930-143435512	WT	KO1	OK	23.4936	43.4865	0.888299	3.97016	5e-05	0.00026409	yes
TAPBPL	TAPBPL	TAPBPL	chr12:6452010-6470899	WT	KO1	OK	17.6777	32.7209	0.888281	3.18176	5e-05	0.00026409	yes
APOL6	APOL6	APOL6	chr22:35648376-35668409	WT	KO1	OK	20.1932	37.3549	0.887429	3.96594	5e-05	0.00026409	yes
SRFBP1	SRFBP1	SRFBP1	chr5:121961960-122028600	WT	KO1	OK	4.93353	9.12024	0.88645	3.50042	5e-05	0.00026409	yes
ABCA1	ABCA1	ABCA1	chr9:104781002-104928246	WT	KO1	OK	1.84493	3.40733	0.885076	3.61839	5e-05	0.00026409	yes
CNN3	CNN3	CNN3	chr1:94896948-94927223	WT	KO1	OK	50.4449	93.1631	0.885051	3.90151	5e-05	0.00026409	yes
IFIT3	IFIT3	IFIT3	chr10:89327818-89340968	WT	KO1	OK	516.438	953.478	0.884604	3.709	5e-05	0.00026409	yes
LACTB	LACTB	LACTB	chr15:63121799-63142065	WT	KO1	OK	32.7786	60.4963	0.884092	3.87562	5e-05	0.00026409	yes
ASAP3	ASAP3	ASAP3	chr1:23428562-23484257	WT	KO1	OK	2.49891	4.60956	0.883333	3.39686	5e-05	0.00026409	yes
HOXA3	HOXA3	HOXA3	chr7:27106189-27130780	WT	KO1	OK	5.5054	10.1511	0.882713	3.07116	5e-05	0.00026409	yes
HMMR	HMMR	HMMR	chr5:163460510-163494058	WT	KO1	OK	9.75602	17.9785	0.881908	3.47267	5e-05	0.00026409	yes
RNF138	RNF138	RNF138	chr18:32091854-32131561	WT	KO1	OK	2.99556	5.51391	0.880252	3.33031	5e-05	0.00026409	yes
PRKCH	PRKCH	PRKCH	chr14:61321442-61550980	WT	KO1	OK	2.80783	5.16772	0.880072	3.39988	5e-05	0.00026409	yes
XAF1	XAF1	XAF1	chr17:6755836-6775645	WT	KO1	OK	42.1383	77.4492	0.87812	3.9405	5e-05	0.00026409	yes
EGLN1	EGLN1	EGLN1	chr1:231363750-231425044	WT	KO1	OK	13.0341	23.9367	0.876931	3.91385	5e-05	0.00026409	yes
BST2	BST2	BST2	chr19:17402938-17405648	WT	KO1	OK	83.0123	152.056	0.873205	3.84638	5e-05	0.00026409	yes
TUBB3	TUBB3	TUBB3	chr16:89922008-89936097	WT	KO1	OK	68.154	124.835	0.87315	3.91169	5e-05	0.00026409	yes
FLJ32255	FLJ32255	FLJ32255	chr5:42985398-42993333	WT	KO1	OK	6.37698	11.6793	0.873009	3.52638	5e-05	0.00026409	yes
ACBD7	ACBD7	ACBD7	chr10:15075474-15088776	WT	KO1	OK	0.859976	1.57402	0.872086	2.64259	5e-05	0.00026409	yes
ZFP62	ZFP62	ZFP62	chr5:180847610-180861286	WT	KO1	OK	2.53559	4.63432	0.870035	3.3118	5e-05	0.00026409	yes
RAB27B	RAB27B	RAB27B	chr18:54828476-54895516	WT	KO1	OK	8.79408	16.0413	0.867189	3.80509	5e-05	0.00026409	yes
OPTN	OPTN	OPTN	chr10:13100081-13138276	WT	KO1	OK	85.4038	155.759	0.866942	3.90728	5e-05	0.00026409	yes
LRRCC1	LRRCC1	LRRCC1	chr8:85107087-85146079	WT	KO1	OK	0.681409	1.24172	0.865748	2.55976	5e-05	0.00026409	yes
ZNF250	ZNF250	ZNF250	chr8:144876950-144901461	WT	KO1	OK	0.974283	1.77287	0.863673	3.08314	5e-05	0.00026409	yes
SPRY1	SPRY1	SPRY1	chr4:123396794-123403760	WT	KO1	OK	3.10694	5.65263	0.863429	3.12609	5e-05	0.00026409	yes
C21orf58	C21orf58	C21orf58	chr21:46300429-46323899	WT	KO1	OK	2.31085	4.20073	0.862221	2.7222	5e-05	0.00026409	yes
SLC2A12	SLC2A12	SLC2A12	chr6:133987580-134052651	WT	KO1	OK	1.88201	3.42072	0.862025	3.30101	5e-05	0.00026409	yes
ZNF527	ZNF527	ZNF527	chr19:37371156-37393064	WT	KO1	OK	0.613747	1.11502	0.861355	2.68077	5e-05	0.00026409	yes
CISD1	CISD1	CISD1	chr10:58269101-58289259	WT	KO1	OK	13.2304	24.0308	0.861032	3.6245	5e-05	0.00026409	yes
FADS3	FADS3	FADS3	chr11:61873522-61891545	WT	KO1	OK	23.7447	43.1137	0.860543	3.71748	5e-05	0.00026409	yes
EVC	EVC	EVC	chr4:5711196-5814304	WT	KO1	OK	2.44273	4.43446	0.860267	3.41626	5e-05	0.00026409	yes
WHAMMP3	WHAMMP3	WHAMMP3	chr15:22664738-22685367	WT	KO1	OK	1.3873	2.51371	0.857537	2.88199	5e-05	0.00026409	yes
PHLDA1	PHLDA1	PHLDA1	chr12:76025446-76031776	WT	KO1	OK	29.8298	54.0476	0.857477	3.85643	5e-05	0.00026409	yes
BACE1	BACE1	BACE1	chr11:117232624-117316256	WT	KO1	OK	3.21328	5.82166	0.857381	2.56884	5e-05	0.00026409	yes
NUDT12	NUDT12	NUDT12	chr5:103548854-103562801	WT	KO1	OK	0.971065	1.75861	0.856792	2.65059	5e-05	0.00026409	yes
SHROOM1	SHROOM1	SHROOM1	chr5:132822140-132830898	WT	KO1	OK	2.52759	4.57518	0.856066	3.16924	5e-05	0.00026409	yes
LOC103611081	LOC103611081	LOC103611081	chr11:130866248-130870247	WT	KO1	OK	0.813276	1.47066	0.854645	2.65798	5e-05	0.00026409	yes
ERBIN	ERBIN	ERBIN	chr5:65926553-66081023	WT	KO1	OK	14.6003	26.3596	0.852336	3.75449	5e-05	0.00026409	yes
IFI30	IFI30	IFI30	chr19:18173779-18178124	WT	KO1	OK	107.054	193.088	0.850928	3.76283	5e-05	0.00026409	yes
RAD51AP1	RAD51AP1	RAD51AP1	chr12:4538783-4560047	WT	KO1	OK	7.15629	12.9022	0.850336	3.38067	5e-05	0.00026409	yes
CD274	CD274	CD274	chr9:5450502-5470567	WT	KO1	OK	16.0287	28.8985	0.850334	2.94175	5e-05	0.00026409	yes
SNX6	SNX6	SNX6	chr14:34561411-34630160	WT	KO1	OK	37.5035	67.5828	0.849632	3.81459	5e-05	0.00026409	yes
ZNF264	ZNF264	ZNF264	chr19:57191499-57222846	WT	KO1	OK	0.766619	1.38117	0.849305	3.21494	5e-05	0.00026409	yes
C1QTNF1	C1QTNF1	C1QTNF1	chr17:79019208-79049788	WT	KO1	OK	23.3988	42.1483	0.84904	3.71631	5e-05	0.00026409	yes
FOS	FOS	FOS	chr14:75278777-75282234	WT	KO1	OK	49.9303	89.9172	0.848683	3.80682	5e-05	0.00026409	yes
F2R	F2R	F2R	chr5:76716042-76735780	WT	KO1	OK	25.3854	45.6653	0.847097	3.79872	5e-05	0.00026409	yes
ADGRG6	ADGRG6	ADGRG6	chr6:142301918-142446266	WT	KO1	OK	19.1399	34.4226	0.84677	3.75382	5e-05	0.00026409	yes
RIN1	RIN1	RIN1	chr11:66332070-66336529	WT	KO1	OK	6.26651	11.2699	0.846738	3.38354	5e-05	0.00026409	yes
NECTIN3	NECTIN3	NECTIN3	chr3:111071758-111194169	WT	KO1	OK	5.77041	10.3672	0.845288	3.24443	5e-05	0.00026409	yes
EFNA3	EFNA3	EFNA3	chr1:155078871-155087538	WT	KO1	OK	2.25372	4.04835	0.845025	2.70757	5e-05	0.00026409	yes
HOMER1	HOMER1	HOMER1	chr5:79373823-79513836	WT	KO1	OK	1.02604	1.84281	0.844822	2.78277	5e-05	0.00026409	yes
ZNF354A	ZNF354A	ZNF354A	chr5:178711520-178730702	WT	KO1	OK	3.10545	5.57325	0.843718	3.06339	5e-05	0.00026409	yes
MCOLN3	MCOLN3	MCOLN3	chr1:85018081-85048540	WT	KO1	OK	1.39981	2.51141	0.843271	2.70408	5e-05	0.00026409	yes
ZNF680	ZNF680	ZNF680	chr7:64519876-64563127	WT	KO1	OK	0.980058	1.75779	0.84282	2.54763	5e-05	0.00026409	yes
SH2B3	SH2B3	SH2B3	chr12:111405947-111451623	WT	KO1	OK	11.7184	20.992	0.841059	3.71021	5e-05	0.00026409	yes
ACO1	ACO1	ACO1	chr9:32384602-32450834	WT	KO1	OK	9.43958	16.8973	0.839998	3.60601	5e-05	0.00026409	yes
BMF	BMF	BMF	chr15:40087890-40108884	WT	KO1	OK	1.6307	2.9187	0.839833	3.00568	5e-05	0.00026409	yes
FAM13B	FAM13B	FAM13B	chr5:137889435-138038933	WT	KO1	OK	6.55649	11.7348	0.839793	3.58941	5e-05	0.00026409	yes
TRAFD1	TRAFD1	TRAFD1	chr12:112125544-112153604	WT	KO1	OK	43.7855	78.3628	0.839715	3.77974	5e-05	0.00026409	yes
NGFR	NGFR	NGFR	chr17:49495292-49574064	WT	KO1	OK	1.2096	2.16399	0.839164	2.68583	5e-05	0.00026409	yes
LAMA3	LAMA3	LAMA3	chr18:23689442-23955065	WT	KO1	OK	13.0236	23.2959	0.838944	3.2485	5e-05	0.00026409	yes
ZNF615	ZNF615	ZNF615	chr19:51991333-52008230	WT	KO1	OK	0.825764	1.47463	0.836551	2.54349	5e-05	0.00026409	yes
NPC1	NPC1	NPC1	chr18:23503469-23586617	WT	KO1	OK	36.4646	65.1025	0.836215	3.57724	5e-05	0.00026409	yes
PQLC1	PQLC1	PQLC1	chr18:79902419-79951653	WT	KO1	OK	5.15705	9.20384	0.83569	3.2206	5e-05	0.00026409	yes
NUAK1	NUAK1	NUAK1	chr12:106063346-106140033	WT	KO1	OK	4.78648	8.54189	0.83559	3.56407	5e-05	0.00026409	yes
CDC42SE2	CDC42SE2	CDC42SE2	chr5:131264008-131394689	WT	KO1	OK	25.7489	45.9301	0.834926	3.71285	5e-05	0.00026409	yes
CCDC146	CCDC146	CCDC146	chr7:77122616-77295204	WT	KO1	OK	2.71159	4.83635	0.834779	3.11148	5e-05	0.00026409	yes
SDSL	SDSL	SDSL	chr12:113422389-113438276	WT	KO1	OK	26.052	46.4431	0.834071	3.56422	5e-05	0.00026409	yes
MED7	MED7	MED7	chr5:157138439-157142910	WT	KO1	OK	11.8332	21.0944	0.834012	3.23528	5e-05	0.00026409	yes
GATA6	GATA6	GATA6	chr18:22169436-22202528	WT	KO1	OK	2.5888	4.61269	0.833327	3.15971	5e-05	0.00026409	yes
NPTXR	NPTXR	NPTXR	chr22:38818450-38844012	WT	KO1	OK	2.77899	4.94988	0.832832	3.35353	5e-05	0.00026409	yes
ERAP2	ERAP2	ERAP2	chr5:96875939-96919702	WT	KO1	OK	4.54894	8.10102	0.832573	3.46899	5e-05	0.00026409	yes
SRD5A3	SRD5A3	SRD5A3	chr4:55346220-55385580	WT	KO1	OK	1.79814	3.197	0.830215	2.95958	5e-05	0.00026409	yes
JADE2	JADE2	JADE2	chr5:134524374-134583230	WT	KO1	OK	20.2265	35.9515	0.829805	3.75384	5e-05	0.00026409	yes
ZCCHC2	ZCCHC2	ZCCHC2	chr18:62523424-62586743	WT	KO1	OK	4.07037	7.23148	0.82913	3.4386	5e-05	0.00026409	yes
EIF5A2	EIF5A2	EIF5A2	chr3:170888414-170908637	WT	KO1	OK	1.86572	3.31412	0.828891	3.15675	5e-05	0.00026409	yes
ENPP1	ENPP1	ENPP1	chr6:131808015-131895155	WT	KO1	OK	1.68844	2.99717	0.827906	3.22081	5e-05	0.00026409	yes
C12orf76	C12orf76	C12orf76	chr12:110041176-110067695	WT	KO1	OK	1.98048	3.51487	0.827619	2.64331	5e-05	0.00026409	yes
LINC00963	LINC00963	LINC00963	chr9:129488659-129513689	WT	KO1	OK	4.23516	7.51406	0.827176	3.06767	5e-05	0.00026409	yes
CCDC18	CCDC18	CCDC18	chr1:93180715-93278730	WT	KO1	OK	1.43656	2.54804	0.826773	2.90636	5e-05	0.00026409	yes
GS1-259H13.2	GS1-259H13.2	GS1-259H13.2	chr7:99598278-99610833	WT	KO1	OK	2.3866	4.23263	0.826597	2.36589	5e-05	0.00026409	yes
PLEKHO1	PLEKHO1	PLEKHO1	chr1:150149433-150160065	WT	KO1	OK	3.1416	5.56745	0.825515	2.88647	5e-05	0.00026409	yes
ST3GAL3	ST3GAL3	ST3GAL3	chr1:43707532-43931165	WT	KO1	OK	2.71061	4.79983	0.824366	2.67675	5e-05	0.00026409	yes
BNIP3	BNIP3	BNIP3	chr10:131967682-131982013	WT	KO1	OK	57.714	102.143	0.823597	3.66737	5e-05	0.00026409	yes
SPTB	SPTB	SPTB	chr14:64746282-64823148	WT	KO1	OK	0.438337	0.774996	0.822148	2.50742	5e-05	0.00026409	yes
NIPAL2	NIPAL2	NIPAL2	chr8:98189825-98294393	WT	KO1	OK	1.70281	3.0105	0.822089	3.00731	5e-05	0.00026409	yes
SLF1	SLF1	SLF1	chr5:94618685-94695868	WT	KO1	OK	2.47047	4.36692	0.821829	3.04283	5e-05	0.00026409	yes
IDH2	IDH2	IDH2	chr15:90083979-90102554	WT	KO1	OK	26.13	46.1861	0.821753	3.56115	5e-05	0.00026409	yes
TRAM2	TRAM2	TRAM2	chr6:52497401-52577064	WT	KO1	OK	7.72482	13.6506	0.821391	3.62882	5e-05	0.00026409	yes
RRM2	RRM2	RRM2	chr2:10122567-10131419	WT	KO1	OK	34.0876	60.2254	0.821128	3.67972	5e-05	0.00026409	yes
COL4A3BP	COL4A3BP	COL4A3BP	chr5:75371102-75599821	WT	KO1	OK	10.2599	18.1206	0.820615	2.90376	5e-05	0.00026409	yes
C4orf33	C4orf33	C4orf33	chr4:129093673-129112688	WT	KO1	OK	8.73451	15.4261	0.820573	3.22052	5e-05	0.00026409	yes
ZFYVE19	ZFYVE19	ZFYVE19	chr15:40767868-40814569	WT	KO1	OK	10.0692	17.7694	0.819452	2.79715	5e-05	0.00026409	yes
MALAT1	MALAT1	MALAT1	chr11:65497761-65506512	WT	KO1	OK	35.9604	63.4174	0.818468	3.61876	5e-05	0.00026409	yes
TM4SF18	TM4SF18	TM4SF18	chr3:149318497-149333761	WT	KO1	OK	12.6092	22.2164	0.817144	3.54791	5e-05	0.00026409	yes
HTR7P1	HTR7P1	HTR7P1	chr12:13000441-13004830	WT	KO1	OK	0.670304	1.18075	0.816822	2.45373	5e-05	0.00026409	yes
TGM2	TGM2	TGM2	chr20:38127386-38166578	WT	KO1	OK	391.9	690.28	0.816695	3.28903	5e-05	0.00026409	yes
PTBP3	PTBP3	PTBP3	chr9:112217714-112333664	WT	KO1	OK	26.6822	46.9951	0.816629	3.37873	5e-05	0.00026409	yes
KIAA1614	KIAA1614	KIAA1614	chr1:180913176-180946103	WT	KO1	OK	0.6078	1.07041	0.816501	2.40743	5e-05	0.00026409	yes
ARSJ	ARSJ	ARSJ	chr4:113900283-113979722	WT	KO1	OK	5.48478	9.6374	0.81321	3.41713	5e-05	0.00026409	yes
C5orf24	C5orf24	C5orf24	chr5:134845679-134859735	WT	KO1	OK	7.5392	13.2401	0.812432	3.37743	5e-05	0.00026409	yes
LPIN2	LPIN2	LPIN2	chr18:2916993-3011947	WT	KO1	OK	6.34517	11.1394	0.811942	3.49809	5e-05	0.00026409	yes
STC1	STC1	STC1	chr8:23841920-23854807	WT	KO1	OK	13.028	22.8463	0.810344	3.55253	5e-05	0.00026409	yes
TSC22D3	TSC22D3	TSC22D3	chrX:107713221-107775988	WT	KO1	OK	15.0098	26.2843	0.808301	3.33172	5e-05	0.00026409	yes
STX1B	STX1B	STX1B	chr16:30989255-31010638	WT	KO1	OK	1.45064	2.53734	0.806629	2.88611	5e-05	0.00026409	yes
GSAP	GSAP	GSAP	chr7:77310750-77425443	WT	KO1	OK	5.70249	9.96844	0.805777	3.26591	5e-05	0.00026409	yes
SNX30	SNX30	SNX30	chr9:112750853-112874987	WT	KO1	OK	1.60664	2.80813	0.805565	3.14287	5e-05	0.00026409	yes
SLC16A1	SLC16A1	SLC16A1	chr1:112911847-112956353	WT	KO1	OK	18.9371	33.0838	0.804909	3.58302	5e-05	0.00026409	yes
DTWD2	DTWD2	DTWD2	chr5:118836073-118988605	WT	KO1	OK	1.02286	1.78668	0.804674	2.78821	5e-05	0.00026409	yes
TMEM8B	TMEM8B	TMEM8B	chr9:35829224-35854847	WT	KO1	OK	1.07656	1.8793	0.803767	2.30079	5e-05	0.00026409	yes
PLAGL1	PLAGL1	PLAGL1	chr6:143940299-144064599	WT	KO1	OK	4.27354	7.45808	0.803373	3.08803	5e-05	0.00026409	yes
FOXQ1	FOXQ1	FOXQ1	chr6:1312439-1314758	WT	KO1	OK	3.84247	6.70396	0.802978	2.96834	5e-05	0.00026409	yes
SNX18	SNX18	SNX18	chr5:54517758-54546586	WT	KO1	OK	1.8906	3.29836	0.802906	3.01351	5e-05	0.00026409	yes
SLC39A8	SLC39A8	SLC39A8	chr4:102251040-102345498	WT	KO1	OK	14.32	24.9714	0.802241	3.37161	5e-05	0.00026409	yes
HOTAIRM1	HOTAIRM1	HOTAIRM1	chr7:27096093-27100258	WT	KO1	OK	9.39416	16.3672	0.800969	2.79904	5e-05	0.00026409	yes
ZFP30	ZFP30	ZFP30	chr19:37632487-37656261	WT	KO1	OK	1.61892	2.81969	0.800508	2.82394	5e-05	0.00026409	yes
AKR1B1	AKR1B1	AKR1B1	chr7:134442354-134459136	WT	KO1	OK	1262.14	2197.22	0.799803	3.27786	5e-05	0.00026409	yes
ZNF124	ZNF124	ZNF124	chr1:247121974-247172017	WT	KO1	OK	2.19552	3.82007	0.799034	2.2785	5e-05	0.00026409	yes
SEC16B	SEC16B	SEC16B	chr1:177929106-177969915	WT	KO1	OK	3.02918	5.26649	0.797913	3.1125	5e-05	0.00026409	yes
TMBIM4	TMBIM4	TMBIM4	chr12:66136935-66170072	WT	KO1	OK	12.9724	22.5536	0.79791	3.30514	5e-05	0.00026409	yes
BRSK2	BRSK2	BRSK2	chr11:1389898-1462689	WT	KO1	OK	1.49945	2.60551	0.797131	2.79339	5e-05	0.00026409	yes
E2F7	E2F7	E2F7	chr12:77021245-77065580	WT	KO1	OK	1.03492	1.79822	0.797046	2.74341	5e-05	0.00026409	yes
C4orf46	C4orf46	C4orf46	chr4:158666674-158708713	WT	KO1	OK	2.62469	4.55758	0.796121	2.30295	5e-05	0.00026409	yes
PPDPF	PPDPF	PPDPF	chr20:63520779-63522171	WT	KO1	OK	77.5491	134.654	0.796075	3.39096	5e-05	0.00026409	yes
HS2ST1	HS2ST1	HS2ST1	chr1:86914651-87109998	WT	KO1	OK	6.39427	11.1004	0.795764	2.70514	5e-05	0.00026409	yes
FAM3C	FAM3C	FAM3C	chr7:121348850-121396368	WT	KO1	OK	37.4274	64.9189	0.794544	3.56106	5e-05	0.00026409	yes
STARD4	STARD4	STARD4	chr5:111496034-112017306	WT	KO1	OK	31.6016	54.7847	0.793777	2.65542	5e-05	0.00026409	yes
DCHS1	DCHS1	DCHS1	chr11:6621323-6655849	WT	KO1	OK	0.337554	0.585131	0.793639	2.51553	5e-05	0.00026409	yes
CXCL8	CXCL8	CXCL8	chr4:73740505-73743716	WT	KO1	OK	29.2845	50.7626	0.793629	3.45027	5e-05	0.00026409	yes
LINC00473	LINC00473	LINC00473	chr6:165924047-165989615	WT	KO1	OK	12.5013	21.6599	0.792947	2.87852	5e-05	0.00026409	yes
SKP1	SKP1	SKP1	chr5:134156390-134177033	WT	KO1	OK	148.568	257.318	0.792427	3.55133	5e-05	0.00026409	yes
TIMP1	TIMP1	TIMP1	chrX:47561099-47619857	WT	KO1	OK	285.498	493.368	0.789182	2.99418	5e-05	0.00026409	yes
COL4A1	COL4A1	COL4A1	chr13:110148957-110307157	WT	KO1	OK	11.7504	20.2956	0.78846	3.4841	5e-05	0.00026409	yes
ST3GAL2	ST3GAL2	ST3GAL2	chr16:70379434-70439088	WT	KO1	OK	14.2816	24.6675	0.788455	3.49081	5e-05	0.00026409	yes
ZNF252P	ZNF252P	ZNF252P	chr8:144973588-145006046	WT	KO1	OK	2.18756	3.7767	0.787802	2.92211	5e-05	0.00026409	yes
ELOVL5	ELOVL5	ELOVL5	chr6:53267397-53349179	WT	KO1	OK	57.0376	98.468	0.78774	3.31031	5e-05	0.00026409	yes
DCAF16	DCAF16	DCAF16	chr4:17800654-17810758	WT	KO1	OK	2.09119	3.6095	0.787478	2.96965	5e-05	0.00026409	yes
PPP1R13B	PPP1R13B	PPP1R13B	chr14:103733750-103847590	WT	KO1	OK	1.84082	3.17029	0.784268	2.93836	5e-05	0.00026409	yes
IPW	IPW	IPW	chr15:25116544-25122476	WT	KO1	OK	2.54659	4.38573	0.784252	3.04352	5e-05	0.00026409	yes
AXIN2	AXIN2	AXIN2	chr17:65528564-65561622	WT	KO1	OK	5.8756	10.1168	0.783947	3.23526	5e-05	0.00026409	yes
EXT1	EXT1	EXT1	chr8:117799364-118111819	WT	KO1	OK	31.3355	53.9323	0.783353	3.51371	5e-05	0.00026409	yes
FAM92A1	FAM92A1	FAM92A1	chr8:93700506-93729250	WT	KO1	OK	5.16522	8.889	0.783192	2.94533	5e-05	0.00026409	yes
CDT1	CDT1	CDT1	chr16:88803777-88809258	WT	KO1	OK	5.35696	9.21575	0.782686	3.07491	5e-05	0.00026409	yes
PON1	PON1	PON1	chr7:95298356-95324572	WT	KO1	OK	3.36522	5.78713	0.782148	2.68778	5e-05	0.00026409	yes
TP53INP1	TP53INP1	TP53INP1	chr8:94925971-94949387	WT	KO1	OK	2.40173	4.12861	0.781583	3.05642	5e-05	0.00026409	yes
ASPHD2	ASPHD2	ASPHD2	chr22:26429313-26445012	WT	KO1	OK	1.59107	2.73504	0.78157	2.65969	5e-05	0.00026409	yes
TMEM64	TMEM64	TMEM64	chr8:90621994-90645905	WT	KO1	OK	4.08388	7.01871	0.781267	3.21651	5e-05	0.00026409	yes
SLC44A1	SLC44A1	SLC44A1	chr9:105244612-105397347	WT	KO1	OK	7.78728	13.3833	0.78124	3.47488	5e-05	0.00026409	yes
FKBP5	FKBP5	FKBP5	chr6:35573584-35736947	WT	KO1	OK	9.92192	17.0363	0.779923	3.34567	5e-05	0.00026409	yes
PLAT	PLAT	PLAT	chr8:42174717-42207724	WT	KO1	OK	1.8385	3.15505	0.779129	2.67868	5e-05	0.00026409	yes
ASAH2B	ASAH2B	ASAH2B	chr10:50739687-50757186	WT	KO1	OK	3.08156	5.2882	0.779115	2.94669	5e-05	0.00026409	yes
CNTNAP3P2	CNTNAP3P2	CNTNAP3P2	chr9:67059459-67297156	WT	KO1	OK	1.01837	1.74659	0.778278	2.84531	5e-05	0.00026409	yes
CEBPA	CEBPA	CEBPA	chr19:33299933-33302564	WT	KO1	OK	5.49001	9.4129	0.777829	3.06449	5e-05	0.00026409	yes
ZCCHC14	ZCCHC14	ZCCHC14	chr16:87406245-87491854	WT	KO1	OK	2.80984	4.81642	0.777475	3.18821	5e-05	0.00026409	yes
ARNT2	ARNT2	ARNT2	chr15:80404349-80597936	WT	KO1	OK	6.19364	10.6108	0.776677	3.35042	5e-05	0.00026409	yes
UHMK1	UHMK1	UHMK1	chr1:162497173-162529629	WT	KO1	OK	10.44	17.8808	0.776294	3.36419	5e-05	0.00026409	yes
ZNF470	ZNF470	ZNF470	chr19:56567520-56582894	WT	KO1	OK	0.425518	0.728707	0.77612	2.3872	5e-05	0.00026409	yes
ZFY	ZFY	ZFY	chrY:2935070-2982506	WT	KO1	OK	1.18239	2.02378	0.775343	2.70784	5e-05	0.00026409	yes
GNB4	GNB4	GNB4	chr3:179396087-179451583	WT	KO1	OK	5.06511	8.66849	0.775189	3.28317	5e-05	0.00026409	yes
MIS18BP1	MIS18BP1	MIS18BP1	chr14:45203189-45253402	WT	KO1	OK	6.61662	11.3236	0.775168	3.25927	5e-05	0.00026409	yes
CHSY1	CHSY1	CHSY1	chr15:101175722-101251932	WT	KO1	OK	7.28184	12.4547	0.77431	3.32089	5e-05	0.00026409	yes
SMCHD1	SMCHD1	SMCHD1	chr18:2655886-2805017	WT	KO1	OK	6.16951	10.546	0.773472	3.38245	5e-05	0.00026409	yes
ZNF559	ZNF559	ZNF559	chr19:9323771-9382617	WT	KO1	OK	1.45411	2.48315	0.772037	2.38529	5e-05	0.00026409	yes
GPRC5B	GPRC5B	GPRC5B	chr16:19858970-19885634	WT	KO1	OK	12.4411	21.2083	0.769508	3.31166	5e-05	0.00026409	yes
EFNB2	EFNB2	EFNB2	chr13:106489730-106535040	WT	KO1	OK	2.57989	4.39666	0.769095	2.96897	5e-05	0.00026409	yes
APOL4	APOL4	APOL4	chr22:36189127-36204833	WT	KO1	OK	1.01934	1.73532	0.767567	2.31133	5e-05	0.00026409	yes
MOK	MOK	MOK	chr14:102224496-102305200	WT	KO1	OK	5.90273	10.0407	0.766411	2.68779	5e-05	0.00026409	yes
TBC1D9B	TBC1D9B	TBC1D9B	chr5:179862070-179907856	WT	KO1	OK	20.0224	34.0218	0.764844	3.49954	5e-05	0.00026409	yes
VEGFA	VEGFA	VEGFA	chr6:43770208-43786486	WT	KO1	OK	17.7766	30.2019	0.764665	3.31059	5e-05	0.00026409	yes
DYRK3	DYRK3	DYRK3	chr1:206635535-206649197	WT	KO1	OK	4.11099	6.98324	0.764409	2.7993	5e-05	0.00026409	yes
DCTN4	DCTN4	DCTN4	chr5:150708746-150759095	WT	KO1	OK	12.7668	21.6855	0.764335	3.34634	5e-05	0.00026409	yes
CFH	CFH	CFH	chr1:196651877-196747504	WT	KO1	OK	73.8726	125.414	0.763588	3.28513	5e-05	0.00026409	yes
LINC01138	LINC01138	LINC01138	chr1:148432958-148459920	WT	KO1	OK	3.17853	5.38921	0.761713	2.32056	5e-05	0.00026409	yes
PLXNC1	PLXNC1	PLXNC1	chr12:94148722-94307675	WT	KO1	OK	1.1727	1.98752	0.761136	2.42132	5e-05	0.00026409	yes
CCNE1	CCNE1	CCNE1	chr19:29811993-29824317	WT	KO1	OK	8.24671	13.9706	0.760501	3.00989	5e-05	0.00026409	yes
PTTG1IP	PTTG1IP	PTTG1IP	chr21:44849584-44873903	WT	KO1	OK	63.4243	107.44	0.760429	3.39912	5e-05	0.00026409	yes
ZNF780B	ZNF780B	ZNF780B	chr19:40028259-40056208	WT	KO1	OK	1.26335	2.13884	0.759573	2.89079	5e-05	0.00026409	yes
IFIT1	IFIT1	IFIT1	chr10:89392545-89406487	WT	KO1	OK	284.526	481.599	0.759272	3.20292	5e-05	0.00026409	yes
RNF24	RNF24	RNF24	chr20:3888838-4015591	WT	KO1	OK	7.77335	13.1564	0.759161	2.57745	5e-05	0.00026409	yes
TCTN1	TCTN1	TCTN1	chr12:110614026-110689812	WT	KO1	OK	10.2106	17.2803	0.759056	2.96712	5e-05	0.00026409	yes
DTWD1	DTWD1	DTWD1	chr15:49621028-49645136	WT	KO1	OK	1.84485	3.12103	0.758516	2.50708	5e-05	0.00026409	yes
CSNK1A1	CSNK1A1	CSNK1A1	chr5:149495893-149551552	WT	KO1	OK	61.6158	104.22	0.758256	3.37887	5e-05	0.00026409	yes
HPGD	HPGD	HPGD	chr4:174490176-174522898	WT	KO1	OK	34.4148	58.2013	0.758024	3.3527	5e-05	0.00026409	yes
HIRIP3	HIRIP3	HIRIP3	chr16:29992320-29996096	WT	KO1	OK	4.19226	7.08891	0.757834	2.9539	5e-05	0.00026409	yes
LHFPL2	LHFPL2	LHFPL2	chr5:78485214-78648825	WT	KO1	OK	20.4668	34.5965	0.757337	3.39888	5e-05	0.00026409	yes
OLFM1	OLFM1	OLFM1	chr9:135075242-135121184	WT	KO1	OK	3.76714	6.3661	0.75694	2.42263	5e-05	0.00026409	yes
XRN1	XRN1	XRN1	chr3:142306606-142448062	WT	KO1	OK	5.22127	8.81232	0.755121	2.96327	5e-05	0.00026409	yes
UBE2L6	UBE2L6	UBE2L6	chr11:57551654-57568330	WT	KO1	OK	363.439	613.294	0.754866	3.33524	5e-05	0.00026409	yes
ZNF112	ZNF112	ZNF112	chr19:44326552-44356704	WT	KO1	OK	1.16085	1.95754	0.753863	2.46944	5e-05	0.00026409	yes
CXCL5	CXCL5	CXCL5	chr4:73995641-73998729	WT	KO1	OK	79.4809	134.009	0.753653	3.38438	5e-05	0.00026409	yes
SPTSSA	SPTSSA	SPTSSA	chr14:34432937-34462262	WT	KO1	OK	47.7552	80.5055	0.753429	3.38905	5e-05	0.00026409	yes
RMI2	RMI2	RMI2	chr16:11345437-11351763	WT	KO1	OK	12.1728	20.5137	0.752923	2.96199	5e-05	0.00026409	yes
UGCG	UGCG	UGCG	chr9:111896765-111935374	WT	KO1	OK	15.9897	26.9458	0.752916	3.31255	5e-05	0.00026409	yes
ANKRA2	ANKRA2	ANKRA2	chr5:73552199-73565686	WT	KO1	OK	6.83422	11.5156	0.752736	2.98168	5e-05	0.00026409	yes
CYB5A	CYB5A	CYB5A	chr18:74253291-74292016	WT	KO1	OK	119.717	201.695	0.752544	3.34388	5e-05	0.00026409	yes
TBL1X	TBL1X	TBL1X	chrX:9463294-9719740	WT	KO1	OK	7.85186	13.2277	0.752451	3.27889	5e-05	0.00026409	yes
CUL4B	CUL4B	CUL4B	chrX:120524590-120575829	WT	KO1	OK	26.2652	44.2383	0.752144	3.34242	5e-05	0.00026409	yes
CNOT6	CNOT6	CNOT6	chr5:180494398-180578405	WT	KO1	OK	9.78511	16.4593	0.750243	3.31586	5e-05	0.00026409	yes
NDFIP1	NDFIP1	NDFIP1	chr5:142108758-142154443	WT	KO1	OK	33.3547	56.0896	0.749845	3.37057	5e-05	0.00026409	yes
GFPT2	GFPT2	GFPT2	chr5:180300689-180353387	WT	KO1	OK	43.1732	72.5958	0.749748	3.36847	5e-05	0.00026409	yes
ARHGAP33	ARHGAP33	ARHGAP33	chr19:35775514-35788822	WT	KO1	OK	1.90712	3.2063	0.749511	2.72969	5e-05	0.00026409	yes
LMLN	LMLN	LMLN	chr3:197960199-198043720	WT	KO1	OK	0.863739	1.45158	0.74896	2.56143	5e-05	0.00026409	yes
APLP2	APLP2	APLP2	chr11:130069820-130144811	WT	KO1	OK	101.149	169.955	0.748675	3.2821	5e-05	0.00026409	yes
TSPAN7	TSPAN7	TSPAN7	chrX:38561477-38688918	WT	KO1	OK	3.66379	6.1542	0.748235	2.63623	5e-05	0.00026409	yes
HIF1A	HIF1A	HIF1A	chr14:61681040-61749089	WT	KO1	OK	105.533	177.259	0.74817	3.0976	5e-05	0.00026409	yes
TGFB1I1	TGFB1I1	TGFB1I1	chr16:31472154-31477960	WT	KO1	OK	18.2174	30.5956	0.74801	3.18311	5e-05	0.00026409	yes
S100A13	S100A13	S100A13	chr1:153618799-153646306	WT	KO1	OK	251.923	422.984	0.747624	2.51357	5e-05	0.00026409	yes
ARL4C	ARL4C	ARL4C	chr2:234493040-234497053	WT	KO1	OK	33.0617	55.4716	0.746588	3.35986	5e-05	0.00026409	yes
SERINC5	SERINC5	SERINC5	chr5:80111226-80256082	WT	KO1	OK	5.70508	9.56869	0.746075	2.85955	5e-05	0.00026409	yes
MMD	MMD	MMD	chr17:55392612-55421980	WT	KO1	OK	15.3829	25.7986	0.745961	3.23283	5e-05	0.00026409	yes
TTC12	TTC12	TTC12	chr11:113314528-113366392	WT	KO1	OK	2.60768	4.37196	0.745516	2.58291	5e-05	0.00026409	yes
HIST2H2BE	HIST2H2BE	HIST2H2BE	chr1:149884459-149886682	WT	KO1	OK	5.00747	8.39279	0.745068	2.84378	5e-05	0.00026409	yes
BTN3A1	BTN3A1	BTN3A1	chr6:26402236-26415216	WT	KO1	OK	14.7177	24.6565	0.744413	3.21944	5e-05	0.00026409	yes
HERC2P7	HERC2P7	HERC2P7	chr15:22479152-22482374	WT	KO1	OK	4.85206	8.11345	0.741719	2.71489	5e-05	0.00026409	yes
BDH2	BDH2	BDH2	chr4:103077624-103099867	WT	KO1	OK	3.36069	5.61829	0.741374	2.78375	5e-05	0.00026409	yes
ARSK	ARSK	ARSK	chr5:95555120-95605102	WT	KO1	OK	2.13002	3.55966	0.740873	2.65895	5e-05	0.00026409	yes
CYLD	CYLD	CYLD	chr16:50742049-50801935	WT	KO1	OK	8.55393	14.2825	0.73959	3.29082	5e-05	0.00026409	yes
C1RL	C1RL	C1RL	chr12:7094549-7121851	WT	KO1	OK	21.1017	35.232	0.739525	2.43181	5e-05	0.00026409	yes
DCP2	DCP2	DCP2	chr5:112976709-113488830	WT	KO1	OK	2.17743	3.63336	0.73868	2.99674	5e-05	0.00026409	yes
CREBRF	CREBRF	CREBRF	chr5:173056351-173139288	WT	KO1	OK	3.28853	5.48737	0.738671	2.59149	5e-05	0.00026409	yes
SMOX	SMOX	SMOX	chr20:4148778-4187747	WT	KO1	OK	142.028	236.92	0.738222	3.28199	5e-05	0.00026409	yes
UBE2B	UBE2B	UBE2B	chr5:134371175-134392108	WT	KO1	OK	19.1077	31.8544	0.737336	3.22684	5e-05	0.00026409	yes
TUBA1A	TUBA1A	TUBA1A	chr12:49184794-49189324	WT	KO1	OK	52.2225	87.0372	0.73696	3.2694	5e-05	0.00026409	yes
NR1D2	NR1D2	NR1D2	chr3:23945259-23980618	WT	KO1	OK	7.39754	12.3273	0.736743	3.18629	5e-05	0.00026409	yes
IFIT2	IFIT2	IFIT2	chr10:89301948-89309276	WT	KO1	OK	459.29	765.353	0.736719	3.04243	5e-05	0.00026409	yes
TRAM1	TRAM1	TRAM1	chr8:70573217-70608459	WT	KO1	OK	76.4037	127.256	0.736018	3.23889	5e-05	0.00026409	yes
MIS18A	MIS18A	MIS18A	chr21:32268218-32279065	WT	KO1	OK	5.32169	8.86327	0.735955	2.67651	5e-05	0.00026409	yes
CLEC2D	CLEC2D	CLEC2D	chr12:9669707-9699555	WT	KO1	OK	0.93469	1.55663	0.735868	2.46021	5e-05	0.00026409	yes
CALD1	CALD1	CALD1	chr7:134779412-134970729	WT	KO1	OK	44.8552	74.699	0.735813	3.33586	5e-05	0.00026409	yes
AP3S1	AP3S1	AP3S1	chr5:115828196-115914081	WT	KO1	OK	30.6352	51.016	0.735759	2.34523	5e-05	0.00026409	yes
SIX4	SIX4	SIX4	chr14:60709537-60724134	WT	KO1	OK	1.17199	1.95142	0.735565	2.64998	5e-05	0.00026409	yes
CENPK	CENPK	CENPK	chr5:65517765-65563168	WT	KO1	OK	11.1686	18.5793	0.734243	2.97428	5e-05	0.00026409	yes
AKAP7	AKAP7	AKAP7	chr6:131135685-131283535	WT	KO1	OK	2.08367	3.46421	0.733402	2.54507	5e-05	0.00026409	yes
LINC00909	LINC00909	LINC00909	chr18:74591773-74597835	WT	KO1	OK	1.35734	2.25581	0.732865	2.44807	5e-05	0.00026409	yes
RBM20	RBM20	RBM20	chr10:110644396-110839471	WT	KO1	OK	2.07986	3.45413	0.731832	2.92023	5e-05	0.00026409	yes
NCOA4	NCOA4	NCOA4	chr10:46005087-46030714	WT	KO1	OK	56.9397	94.4906	0.730737	3.29061	5e-05	0.00026409	yes
SLC25A30	SLC25A30	SLC25A30	chr13:45393318-45420371	WT	KO1	OK	6.64728	11.0275	0.730273	3.03553	5e-05	0.00026409	yes
NDC80	NDC80	NDC80	chr18:2571510-2616635	WT	KO1	OK	5.77832	9.58543	0.730194	2.82945	5e-05	0.00026409	yes
UBTD2	UBTD2	UBTD2	chr5:172209645-172283791	WT	KO1	OK	9.76251	16.1875	0.729557	3.0834	5e-05	0.00026409	yes
MPP6	MPP6	MPP6	chr7:24573345-24693703	WT	KO1	OK	2.17977	3.61424	0.729516	2.94399	5e-05	0.00026409	yes
CTNNBIP1	CTNNBIP1	CTNNBIP1	chr1:9848275-9910258	WT	KO1	OK	2.85001	4.72342	0.728867	2.68022	5e-05	0.00026409	yes
CAMLG	CAMLG	CAMLG	chr5:134738479-134752160	WT	KO1	OK	11.3502	18.793	0.727481	3.03076	5e-05	0.00026409	yes
GAREM1	GAREM1	GAREM1	chr18:32263520-32470484	WT	KO1	OK	1.64456	2.72275	0.727363	2.81859	5e-05	0.00026409	yes
NOD1	NOD1	NOD1	chr7:30424526-30478777	WT	KO1	OK	3.21277	5.31331	0.725793	2.87467	5e-05	0.00026409	yes
NR2F1	NR2F1	NR2F1	chr5:93583336-93594609	WT	KO1	OK	4.81918	7.9678	0.725394	2.92838	5e-05	0.00026409	yes
SLC8A2	SLC8A2	SLC8A2	chr19:47428021-47472050	WT	KO1	OK	0.919111	1.51919	0.72499	2.4084	5e-05	0.00026409	yes
UBE2D1	UBE2D1	UBE2D1	chr10:58334978-58370753	WT	KO1	OK	6.60653	10.9184	0.724801	2.91014	5e-05	0.00026409	yes
RAB8B	RAB8B	RAB8B	chr15:63189528-63267774	WT	KO1	OK	11.4061	18.8382	0.72385	3.10162	5e-05	0.00026409	yes
ZNF181	ZNF181	ZNF181	chr19:34734574-34742869	WT	KO1	OK	3.50982	5.79542	0.723516	2.76777	5e-05	0.00026409	yes
PLOD2	PLOD2	PLOD2	chr3:146069440-146161495	WT	KO1	OK	67.1293	110.776	0.722634	3.23203	5e-05	0.00026409	yes
THG1L	THG1L	THG1L	chr5:157731388-157741447	WT	KO1	OK	9.51376	15.6755	0.720423	3.04115	5e-05	0.00026409	yes
GTF2IRD1	GTF2IRD1	GTF2IRD1	chr7:74453789-74602593	WT	KO1	OK	8.12443	13.386	0.720387	3.02474	5e-05	0.00026409	yes
PLSCR1	PLSCR1	PLSCR1	chr3:146515179-146544841	WT	KO1	OK	158.741	261.532	0.720314	3.21458	5e-05	0.00026409	yes
ZMIZ1	ZMIZ1	ZMIZ1	chr10:79069034-79316528	WT	KO1	OK	17.7979	29.3072	0.719551	3.24275	5e-05	0.00026409	yes
HMGB3	HMGB3	HMGB3	chrX:150980507-150990775	WT	KO1	OK	37.2739	61.3213	0.71822	3.25123	5e-05	0.00026409	yes
DCBLD2	DCBLD2	DCBLD2	chr3:98795969-98901689	WT	KO1	OK	86.695	142.536	0.717304	3.1455	5e-05	0.00026409	yes
KNL1	KNL1	KNL1	chr15:40594248-40662683	WT	KO1	OK	1.30657	2.14641	0.716145	2.66147	5e-05	0.00026409	yes
WWC1	WWC1	WWC1	chr5:168292059-168472303	WT	KO1	OK	17.6396	28.9742	0.715947	3.19358	5e-05	0.00026409	yes
PDGFA	PDGFA	PDGFA	chr7:497259-519844	WT	KO1	OK	10.1297	16.6319	0.715368	3.00252	5e-05	0.00026409	yes
NEK6	NEK6	NEK6	chr9:124257605-124352440	WT	KO1	OK	9.26029	15.2007	0.715005	2.95242	5e-05	0.00026409	yes
PDE10A	PDE10A	PDE10A	chr6:165327286-165662100	WT	KO1	OK	2.15791	3.53966	0.713974	2.87861	5e-05	0.00026409	yes
POLD3	POLD3	POLD3	chr11:74592529-74643060	WT	KO1	OK	5.24506	8.60143	0.713617	2.91609	5e-05	0.00026409	yes
NCR3LG1	NCR3LG1	NCR3LG1	chr11:17351761-17377321	WT	KO1	OK	1.69605	2.77948	0.71263	2.66724	5e-05	0.00026409	yes
ADGRB2	ADGRB2	ADGRB2	chr1:31727104-31764063	WT	KO1	OK	1.25007	2.04837	0.712476	2.53856	5e-05	0.00026409	yes
TSHZ3	TSHZ3	TSHZ3	chr19:31274944-31349284	WT	KO1	OK	1.73705	2.84634	0.71247	2.63817	5e-05	0.00026409	yes
SOCS1	SOCS1	SOCS1	chr16:11254416-11256182	WT	KO1	OK	4.80139	7.86724	0.712405	2.36743	5e-05	0.00026409	yes
MCTP1	MCTP1	MCTP1	chr5:94705536-95284575	WT	KO1	OK	4.24182	6.94105	0.710472	2.89257	5e-05	0.00026409	yes
IGFBP3	IGFBP3	IGFBP3	chr7:45912244-45921272	WT	KO1	OK	138.342	226.323	0.710139	3.10199	5e-05	0.00026409	yes
BNIP3L	BNIP3L	BNIP3L	chr8:26383006-26413128	WT	KO1	OK	25.6799	42.0008	0.709778	3.16826	5e-05	0.00026409	yes
TESC	TESC	TESC	chr12:117038922-117099446	WT	KO1	OK	106.549	174.235	0.709511	3.07925	5e-05	0.00026409	yes
FAM174A	FAM174A	FAM174A	chr5:100535304-100586740	WT	KO1	OK	9.49798	15.526	0.708996	2.73803	5e-05	0.00026409	yes
PSME1	PSME1	PSME1	chr14:24136157-24141588	WT	KO1	OK	452.55	739.145	0.707779	3.05681	5e-05	0.00026409	yes
GINS1	GINS1	GINS1	chr20:25407682-25448555	WT	KO1	OK	8.40672	13.7222	0.706894	2.97834	5e-05	0.00026409	yes
TNFRSF11A	TNFRSF11A	TNFRSF11A	chr18:62325286-62387710	WT	KO1	OK	2.02712	3.30796	0.706508	2.63063	5e-05	0.00026409	yes
PRELID2	PRELID2	PRELID2	chr5:145756343-145835369	WT	KO1	OK	1.50647	2.45637	0.705359	2.54778	5e-05	0.00026409	yes
DNAJC1	DNAJC1	DNAJC1	chr10:21756547-22003721	WT	KO1	OK	36.5326	59.5225	0.704251	3.12686	5e-05	0.00026409	yes
FNIP1	FNIP1	FNIP1	chr5:131641713-131797063	WT	KO1	OK	8.07008	13.1471	0.704093	3.07856	5e-05	0.00026409	yes
ATG10	ATG10	ATG10	chr5:81972024-82255396	WT	KO1	OK	4.07405	6.63644	0.703948	2.60796	5e-05	0.00026409	yes
ZEB1	ZEB1	ZEB1	chr10:31316527-31529814	WT	KO1	OK	4.45523	7.25438	0.70335	2.81747	5e-05	0.00026409	yes
PORCN	PORCN	PORCN	chrX:48508958-48520814	WT	KO1	OK	5.76281	9.38271	0.703232	2.62838	5e-05	0.00026409	yes
CABLES1	CABLES1	CABLES1	chr18:23134563-23260470	WT	KO1	OK	4.29245	6.98265	0.701975	2.85983	5e-05	0.00026409	yes
RCAN1	RCAN1	RCAN1	chr21:34516442-34615142	WT	KO1	OK	7.22318	11.7467	0.70155	2.75874	5e-05	0.00026409	yes
TNFRSF21	TNFRSF21	TNFRSF21	chr6:47231526-47309947	WT	KO1	OK	30.0452	48.8204	0.700348	3.14475	5e-05	0.00026409	yes
CD68	CD68	CD68	chr17:7579486-7590170	WT	KO1	OK	98.4332	159.897	0.699923	2.42336	5e-05	0.00026409	yes
FOXN3	FOXN3	FOXN3	chr14:89156171-89619150	WT	KO1	OK	1.84426	2.99525	0.699635	2.70872	5e-05	0.00026409	yes
EFNA1	EFNA1	EFNA1	chr1:155127872-155134910	WT	KO1	OK	77.5155	125.89	0.699609	3.11504	5e-05	0.00026409	yes
GRINA	GRINA	GRINA	chr8:143990057-143993415	WT	KO1	OK	123.713	200.881	0.699348	3.12497	5e-05	0.00026409	yes
STK17B	STK17B	STK17B	chr2:196133582-196171612	WT	KO1	OK	1.95756	3.17819	0.699145	2.66669	5e-05	0.00026409	yes
CDCA5	CDCA5	CDCA5	chr11:65077454-65084143	WT	KO1	OK	14.4353	23.4271	0.698575	3.00936	5e-05	0.00026409	yes
IL15RA	IL15RA	IL15RA	chr10:5952370-5978187	WT	KO1	OK	16.276	26.3981	0.697686	2.87009	5e-05	0.00026409	yes
MALT1	MALT1	MALT1	chr18:58670008-58750139	WT	KO1	OK	10.4256	16.9088	0.697646	3.05726	5e-05	0.00026409	yes
TIA1	TIA1	TIA1	chr2:70209443-70248647	WT	KO1	OK	14.1824	22.9961	0.697286	3.0956	5e-05	0.00026409	yes
UCN2	UCN2	UCN2	chr3:48561717-48563768	WT	KO1	OK	12.5208	20.2905	0.696475	2.75871	5e-05	0.00026409	yes
NPR3	NPR3	NPR3	chr5:32710636-32791724	WT	KO1	OK	6.16428	9.98028	0.695149	3.0115	5e-05	0.00026409	yes
ARHGAP31	ARHGAP31	ARHGAP31	chr3:119294372-119419476	WT	KO1	OK	2.10919	3.41075	0.693404	2.78939	5e-05	0.00026409	yes
NEDD1	NEDD1	NEDD1	chr12:96907222-96953691	WT	KO1	OK	15.4598	24.9942	0.693073	3.00689	5e-05	0.00026409	yes
REPIN1	REPIN1	REPIN1	chr7:150368789-150374044	WT	KO1	OK	27.8899	45.0798	0.692738	3.05699	5e-05	0.00026409	yes
SEMA4B	SEMA4B	SEMA4B	chr15:90184919-90229660	WT	KO1	OK	64.6408	104.476	0.692658	3.08313	5e-05	0.00026409	yes
CRTC1	CRTC1	CRTC1	chr19:18683614-18782333	WT	KO1	OK	1.4018	2.26487	0.692149	2.62161	5e-05	0.00026409	yes
ZNF669	ZNF669	ZNF669	chr1:247099961-247104372	WT	KO1	OK	2.4188	3.90759	0.691986	2.23362	5e-05	0.00026409	yes
PURA	PURA	PURA	chr5:140114122-140119416	WT	KO1	OK	3.41769	5.52044	0.691761	2.80716	5e-05	0.00026409	yes
C6orf62	C6orf62	C6orf62	chr6:24667034-24719175	WT	KO1	OK	44.5724	71.9633	0.691111	2.56456	5e-05	0.00026409	yes
TNRC6C	TNRC6C	TNRC6C	chr17:78004236-78111799	WT	KO1	OK	0.71723	1.15698	0.689854	2.30578	5e-05	0.00026409	yes
ZNF300	ZNF300	ZNF300	chr5:150894391-150904983	WT	KO1	OK	2.5919	4.17806	0.688824	2.53548	5e-05	0.00026409	yes
MTSS1L	MTSS1L	MTSS1L	chr16:70661203-70686051	WT	KO1	OK	5.64658	9.10119	0.688677	2.90504	5e-05	0.00026409	yes
CEP41	CEP41	CEP41	chr7:130393770-130441210	WT	KO1	OK	2.03594	3.27754	0.686919	2.58791	5e-05	0.00026409	yes
SHC1	SHC1	SHC1	chr1:154957025-154974483	WT	KO1	OK	116.557	187.564	0.686351	2.91858	5e-05	0.00026409	yes
AMPD3	AMPD3	AMPD3	chr11:10450320-10507579	WT	KO1	OK	3.36048	5.40071	0.68448	2.65736	5e-05	0.00026409	yes
LOC100129550	LOC100129550	LOC100129550	chr3:122886512-122892416	WT	KO1	OK	1.44652	2.32456	0.68437	2.52954	5e-05	0.00026409	yes
REEP5	REEP5	REEP5	chr5:112861187-112922334	WT	KO1	OK	61.017	97.9668	0.683082	2.73279	5e-05	0.00026409	yes
CTSK	CTSK	CTSK	chr1:150796207-150808441	WT	KO1	OK	3.12213	5.01143	0.682692	2.29315	5e-05	0.00026409	yes
ABHD17C	ABHD17C	ABHD17C	chr15:80695310-80755621	WT	KO1	OK	10.6927	17.1547	0.681978	2.83727	5e-05	0.00026409	yes
TGFBR2	TGFBR2	TGFBR2	chr3:30606501-30694141	WT	KO1	OK	60.2411	96.6104	0.681431	3.08411	5e-05	0.00026409	yes
BRIP1	BRIP1	BRIP1	chr17:61679185-61863559	WT	KO1	OK	3.36391	5.39279	0.680891	2.83599	5e-05	0.00026409	yes
RAB23	RAB23	RAB23	chr6:57186993-57222314	WT	KO1	OK	1.99012	3.1891	0.680295	2.52485	5e-05	0.00026409	yes
CD99L2	CD99L2	CD99L2	chrX:150766335-150898816	WT	KO1	OK	30.4828	48.7923	0.67866	3.03119	5e-05	0.00026409	yes
TMSB4X	TMSB4X	TMSB4X	chrX:12975106-12977227	WT	KO1	OK	1663.74	2662.46	0.678329	2.91962	5e-05	0.00026409	yes
ANXA4	ANXA4	ANXA4	chr2:69457994-69826477	WT	KO1	OK	203.148	324.93	0.677594	2.83744	5e-05	0.00026409	yes
RNF130	RNF130	RNF130	chr5:179955066-180072118	WT	KO1	OK	16.7228	26.7427	0.677331	2.91773	5e-05	0.00026409	yes
MAML1	MAML1	MAML1	chr5:179732849-179777286	WT	KO1	OK	9.63118	15.3977	0.676935	2.98392	5e-05	0.00026409	yes
APOL2	APOL2	APOL2	chr22:36226208-36239954	WT	KO1	OK	96.3103	153.789	0.675191	3.03751	5e-05	0.00026409	yes
MCUB	MCUB	MCUB	chr4:109560198-109687716	WT	KO1	OK	18.8388	30.0692	0.674583	2.77368	5e-05	0.00026409	yes
NDST1	NDST1	NDST1	chr5:150497777-150558211	WT	KO1	OK	11.7413	18.7293	0.673698	3.03479	5e-05	0.00026409	yes
BVES	BVES	BVES	chr6:105096823-105137174	WT	KO1	OK	3.45674	5.51185	0.673125	2.75605	5e-05	0.00026409	yes
ZFP90	ZFP90	ZFP90	chr16:68539212-68576072	WT	KO1	OK	4.02682	6.42041	0.673027	2.58768	5e-05	0.00026409	yes
DCAF10	DCAF10	DCAF10	chr9:37800553-37867668	WT	KO1	OK	3.41964	5.45197	0.672934	2.78072	5e-05	0.00026409	yes
SEC31B	SEC31B	SEC31B	chr10:100486645-100519838	WT	KO1	OK	2.74967	4.38207	0.672354	2.61767	5e-05	0.00026409	yes
USP1	USP1	USP1	chr1:62436303-62451804	WT	KO1	OK	10.9649	17.4731	0.672246	2.84506	5e-05	0.00026409	yes
CYR61	CYR61	CYR61	chr1:85580760-85583965	WT	KO1	OK	19.1159	30.4536	0.671842	2.89896	5e-05	0.00026409	yes
CD70	CD70	CD70	chr19:6585838-6591152	WT	KO1	OK	18.8678	30.0421	0.671054	2.64098	5e-05	0.00026409	yes
LZTS2	LZTS2	LZTS2	chr10:100997065-101031157	WT	KO1	OK	20.5253	32.6686	0.670498	2.7021	5e-05	0.00026409	yes
SLC30A1	SLC30A1	SLC30A1	chr1:211575038-211578757	WT	KO1	OK	14.0075	22.2791	0.66949	2.80521	5e-05	0.00026409	yes
PHAX	PHAX	PHAX	chr5:126600914-126627252	WT	KO1	OK	11.4475	18.1962	0.668602	2.9	5e-05	0.00026409	yes
NOL4L	NOL4L	NOL4L	chr20:32443058-32585073	WT	KO1	OK	6.61397	10.5016	0.667021	2.88073	5e-05	0.00026409	yes
CD46	CD46	CD46	chr1:207752037-207795516	WT	KO1	OK	102.499	162.613	0.665829	2.96052	5e-05	0.00026409	yes
DNAJC18	DNAJC18	DNAJC18	chr5:139410202-139439525	WT	KO1	OK	2.37705	3.77084	0.665717	2.58826	5e-05	0.00026409	yes
PTCH1	PTCH1	PTCH1	chr9:95442981-95516965	WT	KO1	OK	1.68359	2.6703	0.665463	2.53494	5e-05	0.00026409	yes
C4orf3	C4orf3	C4orf3	chr4:119296418-119304445	WT	KO1	OK	12.6871	20.118	0.665129	2.83714	5e-05	0.00026409	yes
MEIS2	MEIS2	MEIS2	chr15:36891020-37101299	WT	KO1	OK	3.81581	6.05016	0.664983	2.5115	5e-05	0.00026409	yes
RASA1	RASA1	RASA1	chr5:87268252-87391926	WT	KO1	OK	9.31075	14.7609	0.664812	2.79934	5e-05	0.00026409	yes
HERC6	HERC6	HERC6	chr4:88378738-88443097	WT	KO1	OK	45.4492	71.9994	0.663729	3.01714	5e-05	0.00026409	yes
AK3	AK3	AK3	chr9:4709555-4742043	WT	KO1	OK	16.5958	26.2754	0.662891	2.91597	5e-05	0.00026409	yes
ZFYVE16	ZFYVE16	ZFYVE16	chr5:80408012-80479869	WT	KO1	OK	6.18566	9.79308	0.662835	2.85704	5e-05	0.00026409	yes
IFITM3	IFITM3	IFITM3	chr11:319672-320914	WT	KO1	OK	492.906	779.224	0.660727	2.88289	5e-05	0.00026409	yes
ECE1	ECE1	ECE1	chr1:21217246-21345541	WT	KO1	OK	34.5233	54.5711	0.660568	2.98237	5e-05	0.00026409	yes
RAI14	RAI14	RAI14	chr5:34656327-34832612	WT	KO1	OK	30.6653	48.4549	0.660036	2.96861	5e-05	0.00026409	yes
SLIT3	SLIT3	SLIT3	chr5:168661732-169301129	WT	KO1	OK	2.28865	3.61593	0.659866	2.72418	5e-05	0.00026409	yes
PGRMC2	PGRMC2	PGRMC2	chr4:128269236-128288829	WT	KO1	OK	24.5788	38.8315	0.659814	2.949	5e-05	0.00026409	yes
COL18A1	COL18A1	COL18A1	chr21:45405136-45513720	WT	KO1	OK	29.7561	47.0001	0.65948	2.97236	5e-05	0.00026409	yes
TMEM123	TMEM123	TMEM123	chr11:102396324-102462038	WT	KO1	OK	75.6224	119.435	0.659344	2.94152	5e-05	0.00026409	yes
ATP8B1	ATP8B1	ATP8B1	chr18:57630301-57803095	WT	KO1	OK	4.71428	7.44281	0.658811	2.71559	5e-05	0.00026409	yes
ZNF395	ZNF395	ZNF395	chr8:28345584-28386460	WT	KO1	OK	6.5105	10.2766	0.658522	2.80254	5e-05	0.00026409	yes
BEX3	BEX3	BEX3	chrX:103376322-103378164	WT	KO1	OK	122.315	193.001	0.658009	2.9142	5e-05	0.00026409	yes
MLLT4	MLLT4	MLLT4	chr6:167826990-167972020	WT	KO1	OK	5.75578	9.07846	0.657436	2.85231	5e-05	0.00026409	yes
SLC25A46	SLC25A46	SLC25A46	chr5:110738135-110765161	WT	KO1	OK	7.82621	12.3415	0.657137	2.7952	5e-05	0.00026409	yes
PXYLP1	PXYLP1	PXYLP1	chr3:141231824-141294903	WT	KO1	OK	2.433	3.83644	0.657031	2.36718	5e-05	0.00026409	yes
MAPK12	MAPK12	MAPK12	chr22:50252901-50261759	WT	KO1	OK	9.11589	14.3721	0.656819	2.62123	5e-05	0.00026409	yes
WDR27	WDR27	WDR27	chr6:169457207-169702063	WT	KO1	OK	1.51384	2.38624	0.656532	2.20591	5e-05	0.00026409	yes
RNF145	RNF145	RNF145	chr5:159157408-159210053	WT	KO1	OK	54.1623	85.3635	0.65633	2.95592	5e-05	0.00026409	yes
PHC2	PHC2	PHC2	chr1:33323622-33375593	WT	KO1	OK	36.8705	58.1045	0.656181	2.93338	5e-05	0.00026409	yes
KLHL24	KLHL24	KLHL24	chr3:183635622-183684516	WT	KO1	OK	2.50735	3.95133	0.656175	2.66526	5e-05	0.00026409	yes
CENPJ	CENPJ	CENPJ	chr13:24882273-24922889	WT	KO1	OK	4.41434	6.94798	0.654397	2.70156	5e-05	0.00026409	yes
IFI6	IFI6	IFI6	chr1:27666060-27672213	WT	KO1	OK	1154.93	1817.78	0.654374	2.78621	5e-05	0.00026409	yes
BACE2	BACE2	BACE2	chr21:41167800-41282534	WT	KO1	OK	3.51466	5.52286	0.652028	2.75554	5e-05	0.00026409	yes
C18orf25	C18orf25	C18orf25	chr18:46174021-46266992	WT	KO1	OK	4.71065	7.40105	0.651804	2.71401	5e-05	0.00026409	yes
SDC3	SDC3	SDC3	chr1:30869465-30908633	WT	KO1	OK	3.11543	4.89451	0.651735	2.60168	5e-05	0.00026409	yes
PAPD7	PAPD7	PAPD7	chr5:6714604-6757048	WT	KO1	OK	11.9906	18.8313	0.651231	2.7793	5e-05	0.00026409	yes
ATP10A	ATP10A	ATP10A	chr15:25678712-25863202	WT	KO1	OK	8.58598	13.48	0.65077	2.83515	5e-05	0.00026409	yes
EIF4G2	EIF4G2	EIF4G2	chr11:10797045-10809035	WT	KO1	OK	319.132	500.771	0.649999	2.74899	5e-05	0.00026409	yes
DCK	DCK	DCK	chr4:70993547-71030912	WT	KO1	OK	5.77326	9.051	0.648692	2.55729	5e-05	0.00026409	yes
DAAM1	DAAM1	DAAM1	chr14:59188662-59371405	WT	KO1	OK	2.25859	3.54053	0.648543	2.54032	5e-05	0.00026409	yes
NFIA	NFIA	NFIA	chr1:61077273-61462788	WT	KO1	OK	1.04523	1.63828	0.64837	2.43674	5e-05	0.00026409	yes
MAST4	MAST4	MAST4	chr5:66596347-67169595	WT	KO1	OK	2.4913	3.9045	0.648241	2.22421	5e-05	0.00026409	yes
ZNF367	ZNF367	ZNF367	chr9:96385942-96418387	WT	KO1	OK	2.18677	3.41993	0.645167	2.35579	5e-05	0.00026409	yes
TPM2	TPM2	TPM2	chr9:35681992-35690056	WT	KO1	OK	177.308	277.237	0.644867	2.89634	5e-05	0.00026409	yes
MOCOS	MOCOS	MOCOS	chr18:36187516-36268722	WT	KO1	OK	4.77788	7.46683	0.644126	2.51231	5e-05	0.00026409	yes
PARVA	PARVA	PARVA	chr11:12377478-12535356	WT	KO1	OK	7.92083	12.3742	0.643614	2.85958	5e-05	0.00026409	yes
PTPN1	PTPN1	PTPN1	chr20:50510320-50584762	WT	KO1	OK	27.9632	43.6552	0.642622	2.88463	5e-05	0.00026409	yes
DYNLT1	DYNLT1	DYNLT1	chr6:158636474-158644786	WT	KO1	OK	130.561	203.823	0.642588	2.83896	5e-05	0.00026409	yes
CEACAM1	CEACAM1	CEACAM1	chr19:42397127-42652355	WT	KO1	OK	63.3854	98.9401	0.642406	2.85919	5e-05	0.00026409	yes
SCLT1	SCLT1	SCLT1	chr4:128883994-129093607	WT	KO1	OK	4.67918	7.30314	0.642261	2.45171	5e-05	0.00026409	yes
DUSP1	DUSP1	DUSP1	chr5:172768089-172771200	WT	KO1	OK	144.692	225.788	0.641986	2.88577	5e-05	0.00026409	yes
TNFSF9	TNFSF9	TNFSF9	chr19:6530998-6535928	WT	KO1	OK	11.8718	18.5189	0.641452	2.59979	5e-05	0.00026409	yes
STAT2	STAT2	STAT2	chr12:56341597-56360253	WT	KO1	OK	102.328	159.605	0.641303	2.83626	5e-05	0.00026409	yes
LGALS3BP	LGALS3BP	LGALS3BP	chr17:78971252-78979979	WT	KO1	OK	577.851	901.097	0.640986	2.68733	5e-05	0.00026409	yes
TAF7	TAF7	TAF7	chr5:141318489-141320784	WT	KO1	OK	63.698	99.2904	0.640407	2.88719	5e-05	0.00026409	yes
TMEM51	TMEM51	TMEM51	chr1:15152531-15220480	WT	KO1	OK	21.3437	33.2544	0.639736	2.74032	5e-05	0.00026409	yes
SLC26A2	SLC26A2	SLC26A2	chr5:149960736-149987400	WT	KO1	OK	5.19657	8.09642	0.639726	2.71408	5e-05	0.00026409	yes
NFYB	NFYB	NFYB	chr12:104117079-104138262	WT	KO1	OK	7.80391	12.1581	0.63965	2.68424	5e-05	0.00026409	yes
TK2	TK2	TK2	chr16:66508002-66550412	WT	KO1	OK	6.38226	9.92927	0.63762	2.69565	5e-05	0.00026409	yes
IRF2BP2	IRF2BP2	IRF2BP2	chr1:234604268-234609525	WT	KO1	OK	28.1648	43.7964	0.636917	2.85607	5e-05	0.00026409	yes
LPCAT3	LPCAT3	LPCAT3	chr12:6970780-7018538	WT	KO1	OK	31.5795	49.0904	0.636454	2.42143	5e-05	0.00026409	yes
ACP2	ACP2	ACP2	chr11:47239301-47269033	WT	KO1	OK	27.9599	43.4499	0.635996	2.65258	5e-05	0.00026409	yes
TNIP1	TNIP1	TNIP1	chr5:151029942-151087660	WT	KO1	OK	196.967	305.781	0.63455	2.79892	5e-05	0.00026409	yes
PHF11	PHF11	PHF11	chr13:49444292-49528991	WT	KO1	OK	20.0723	31.1466	0.633871	2.33466	5e-05	0.00026409	yes
LRRK1	LRRK1	LRRK1	chr15:100879691-101070112	WT	KO1	OK	4.63347	7.18955	0.63381	2.23827	5e-05	0.00026409	yes
C19orf66	C19orf66	C19orf66	chr19:10086118-10102749	WT	KO1	OK	29.9347	46.3904	0.632006	2.43888	5e-05	0.00026409	yes
SAP30	SAP30	SAP30	chr4:173370941-173377532	WT	KO1	OK	13.5623	21.0151	0.631823	2.46234	5e-05	0.00026409	yes
GOLGA8B	GOLGA8B	GOLGA8B	chr15:34525282-34583570	WT	KO1	OK	6.96307	10.7878	0.631611	2.66406	5e-05	0.00026409	yes
MRAS	MRAS	MRAS	chr3:138347647-138405535	WT	KO1	OK	2.26014	3.50044	0.631121	2.31403	5e-05	0.00026409	yes
MAPK14	MAPK14	MAPK14	chr6:36027676-36111236	WT	KO1	OK	9.50235	14.7149	0.63092	2.72262	5e-05	0.00026409	yes
IQGAP3	IQGAP3	IQGAP3	chr1:156525404-156572604	WT	KO1	OK	6.05837	9.37921	0.630535	2.71433	5e-05	0.00026409	yes
BCL2A1	BCL2A1	BCL2A1	chr15:79960889-79971301	WT	KO1	OK	22.4892	34.8082	0.630194	2.52493	5e-05	0.00026409	yes
ZNF346	ZNF346	ZNF346	chr5:177022679-177081189	WT	KO1	OK	4.56092	7.05926	0.630193	2.50606	5e-05	0.00026409	yes
IFT81	IFT81	IFT81	chr12:110124334-110218795	WT	KO1	OK	17.5249	27.1226	0.630087	2.76114	5e-05	0.00026409	yes
SRGAP2B	SRGAP2B	SRGAP2B	chr1:144641368-145093362	WT	KO1	OK	4.63772	7.17753	0.630071	2.67679	5e-05	0.00026409	yes
FAM53C	FAM53C	FAM53C	chr5:138285264-138349729	WT	KO1	OK	10.4543	16.1689	0.629128	2.37413	5e-05	0.00026409	yes
CHST11	CHST11	CHST11	chr12:104456913-104762014	WT	KO1	OK	11.9356	18.4584	0.629013	2.78507	5e-05	0.00026409	yes
SCARB2	SCARB2	SCARB2	chr4:76158738-76213899	WT	KO1	OK	40.2186	62.1982	0.629009	2.8297	5e-05	0.00026409	yes
STIM1	STIM1	STIM1	chr11:3855702-4093210	WT	KO1	OK	15.2402	23.5649	0.628762	2.78596	5e-05	0.00026409	yes
TP73-AS1	TP73-AS1	TP73-AS1	chr1:3652564-3747373	WT	KO1	OK	2.64744	4.09328	0.628659	2.38466	5e-05	0.00026409	yes
PSMA4	PSMA4	PSMA4	chr15:78540404-78549221	WT	KO1	OK	390.121	602.871	0.627928	2.78461	5e-05	0.00026409	yes
CD38	CD38	CD38	chr4:15778264-15853243	WT	KO1	OK	30.7343	47.4811	0.627506	2.83557	5e-05	0.00026409	yes
EPHB2	EPHB2	EPHB2	chr1:22710837-22921500	WT	KO1	OK	6.87457	10.6161	0.626908	2.786	5e-05	0.00026409	yes
APBB2	APBB2	APBB2	chr4:40810026-41214618	WT	KO1	OK	2.24222	3.46027	0.625955	2.48194	5e-05	0.00026409	yes
ZRANB2	ZRANB2	ZRANB2	chr1:70852352-71081289	WT	KO1	OK	10.0442	15.5004	0.625946	2.64071	5e-05	0.00026409	yes
POLI	POLI	POLI	chr18:54269478-54298234	WT	KO1	OK	2.19981	3.3946	0.625861	2.44108	5e-05	0.00026409	yes
HNRNPA0	HNRNPA0	HNRNPA0	chr5:137751383-137754350	WT	KO1	OK	35.1413	54.2038	0.625227	2.8016	5e-05	0.00026409	yes
EEA1	EEA1	EEA1	chr12:92772508-92929331	WT	KO1	OK	2.19926	3.39173	0.625004	2.49083	5e-05	0.00026409	yes
FAM172A	FAM172A	FAM172A	chr5:93617724-94111699	WT	KO1	OK	1.71702	2.64742	0.624684	2.25452	5e-05	0.00026409	yes
KIF18A	KIF18A	KIF18A	chr11:28020615-28108199	WT	KO1	OK	6.98145	10.7619	0.62433	2.59107	5e-05	0.00026409	yes
TUG1	TUG1	TUG1	chr22:30969210-30979394	WT	KO1	OK	17.1635	26.4541	0.624143	2.78129	5e-05	0.00026409	yes
RMDN3	RMDN3	RMDN3	chr15:40735883-40755336	WT	KO1	OK	14.3004	22.04	0.624066	2.64918	5e-05	0.00026409	yes
ALDH3B1	ALDH3B1	ALDH3B1	chr11:68008546-68029282	WT	KO1	OK	71.5713	110.298	0.623954	2.79029	5e-05	0.00026409	yes
NINJ1	NINJ1	NINJ1	chr9:93121488-93134288	WT	KO1	OK	67.1854	103.511	0.623564	2.74971	5e-05	0.00026409	yes
SMAD5	SMAD5	SMAD5	chr5:136129513-136182734	WT	KO1	OK	5.02572	7.73679	0.622403	2.64672	5e-05	0.00026409	yes
SYTL2	SYTL2	SYTL2	chr11:85694220-85811159	WT	KO1	OK	7.1915	11.0675	0.621969	2.42137	5e-05	0.00026409	yes
CREG1	CREG1	CREG1	chr1:167541013-167553819	WT	KO1	OK	56.8293	87.4573	0.621944	2.78419	5e-05	0.00026409	yes
TSHZ1	TSHZ1	TSHZ1	chr18:75210754-75289950	WT	KO1	OK	2.11372	3.2515	0.62132	2.36167	5e-05	0.00026409	yes
FGFRL1	FGFRL1	FGFRL1	chr4:1011821-1026898	WT	KO1	OK	9.07306	13.9561	0.621232	2.60643	5e-05	0.00026409	yes
HMGCR	HMGCR	HMGCR	chr5:75337167-75362101	WT	KO1	OK	50.8954	78.2501	0.620557	2.78631	5e-05	0.00026409	yes
GALNT10	GALNT10	GALNT10	chr5:154190734-154445822	WT	KO1	OK	17.7596	27.2996	0.620281	2.77499	5e-05	0.00026409	yes
SIM2	SIM2	SIM2	chr21:36699132-36749917	WT	KO1	OK	2.0751	3.18847	0.619686	2.2963	5e-05	0.00026409	yes
PDP2	PDP2	PDP2	chr16:66880479-66891099	WT	KO1	OK	2.78035	4.26933	0.618743	2.52853	5e-05	0.00026409	yes
NETO2	NETO2	NETO2	chr16:47081519-47144025	WT	KO1	OK	17.9568	27.5618	0.618141	2.74352	5e-05	0.00026409	yes
DPYSL4	DPYSL4	DPYSL4	chr10:132186909-132205776	WT	KO1	OK	6.01279	9.22259	0.617138	2.45638	5e-05	0.00026409	yes
STX6	STX6	STX6	chr1:180972712-181023121	WT	KO1	OK	6.32482	9.70078	0.617076	2.6384	5e-05	0.00026409	yes
BCL9	BCL9	BCL9	chr1:147541500-147626219	WT	KO1	OK	2.36358	3.62494	0.616985	2.44629	5e-05	0.00026409	yes
SH3BP2	SH3BP2	SH3BP2	chr4:2793022-2841096	WT	KO1	OK	3.10849	4.76649	0.616711	2.60975	5e-05	0.00026409	yes
ATAD2	ATAD2	ATAD2	chr8:123319850-123396465	WT	KO1	OK	9.70345	14.8772	0.616538	2.68791	5e-05	0.00026409	yes
ZNF319	ZNF319	ZNF319	chr16:57994667-57999858	WT	KO1	OK	2.87034	4.39811	0.615662	2.38249	5e-05	0.00026409	yes
PARP14	PARP14	PARP14	chr3:122680824-122730840	WT	KO1	OK	87.1024	133.434	0.615337	2.67641	5e-05	0.00026409	yes
PRPS2	PRPS2	PRPS2	chrX:12791354-12824227	WT	KO1	OK	11.629	17.8075	0.61476	2.58806	5e-05	0.00026409	yes
ELK4	ELK4	ELK4	chr1:205607942-205632872	WT	KO1	OK	4.82666	7.38835	0.614225	2.26876	5e-05	0.00026409	yes
ZNF260	ZNF260	ZNF260	chr19:36510686-36528346	WT	KO1	OK	2.6147	3.99969	0.613246	2.41863	5e-05	0.00026409	yes
CLSPN	CLSPN	CLSPN	chr1:35732111-35769950	WT	KO1	OK	1.573	2.40556	0.612852	2.38724	5e-05	0.00026409	yes
OGFRL1	OGFRL1	OGFRL1	chr6:71288441-71309059	WT	KO1	OK	5.42015	8.28534	0.612229	2.67491	5e-05	0.00026409	yes
BMS1P5	BMS1P5	BMS1P5	chr10:46759022-46811988	WT	KO1	OK	2.25919	3.45172	0.611509	2.23969	5e-05	0.00026409	yes
SLC37A1	SLC37A1	SLC37A1	chr21:42499631-42581440	WT	KO1	OK	5.68125	8.66623	0.609194	2.45287	5e-05	0.00026409	yes
TMEM167B	TMEM167B	TMEM167B	chr1:109090740-109096934	WT	KO1	OK	5.13008	7.82136	0.608438	2.38583	5e-05	0.00026409	yes
ZC3H12C	ZC3H12C	ZC3H12C	chr11:110093360-110171841	WT	KO1	OK	3.16928	4.83075	0.608091	2.54869	5e-05	0.00026409	yes
CPEB4	CPEB4	CPEB4	chr5:173888327-173960991	WT	KO1	OK	5.96608	9.0913	0.607704	2.5494	5e-05	0.00026409	yes
TMEM161B	TMEM161B	TMEM161B	chr5:88189632-88268879	WT	KO1	OK	8.19438	12.481	0.607031	2.44275	5e-05	0.00026409	yes
P4HA1	P4HA1	P4HA1	chr10:73007221-73096974	WT	KO1	OK	32.8057	49.9614	0.606865	2.72412	5e-05	0.00026409	yes
ARL14EP	ARL14EP	ARL14EP	chr11:30323098-30338223	WT	KO1	OK	7.70061	11.7261	0.606674	2.44846	5e-05	0.00026409	yes
CADM1	CADM1	CADM1	chr11:115173624-115504523	WT	KO1	OK	6.4694	9.84794	0.60619	2.54223	5e-05	0.00026409	yes
FAM46A	FAM46A	FAM46A	chr6:81745729-81752711	WT	KO1	OK	10.1386	15.4291	0.605792	2.65969	5e-05	0.00026409	yes
CENPU	CENPU	CENPU	chr4:184649612-184734132	WT	KO1	OK	8.92331	13.5739	0.605189	2.35672	5e-05	0.00026409	yes
WDR37	WDR37	WDR37	chr10:1056835-1132297	WT	KO1	OK	3.69795	5.62507	0.605146	2.43534	5e-05	0.00026409	yes
NUCKS1	NUCKS1	NUCKS1	chr1:205712818-205750244	WT	KO1	OK	39.4546	59.9945	0.604636	2.70038	5e-05	0.00026409	yes
TAF9B	TAF9B	TAF9B	chrX:78129747-78139682	WT	KO1	OK	5.64615	8.58236	0.604109	2.36292	5e-05	0.00026409	yes
EPM2AIP1	EPM2AIP1	EPM2AIP1	chr3:36985865-36993304	WT	KO1	OK	3.27718	4.97834	0.603208	2.48459	5e-05	0.00026409	yes
SMIM15	SMIM15	SMIM15	chr5:61157708-61232080	WT	KO1	OK	18.7473	28.4481	0.601645	2.6376	5e-05	0.00026409	yes
ING4	ING4	ING4	chr12:6650537-6663142	WT	KO1	OK	15.9913	24.264	0.601531	2.42371	5e-05	0.00026409	yes
KIAA0101	KIAA0101	KIAA0101	chr15:64365011-64387687	WT	KO1	OK	35.7572	54.2092	0.600305	2.61316	5e-05	0.00026409	yes
AFF4	AFF4	AFF4	chr5:132875378-132963662	WT	KO1	OK	15.2234	23.0751	0.600046	2.62597	5e-05	0.00026409	yes
CCSAP	CCSAP	CCSAP	chr1:229321004-229342941	WT	KO1	OK	2.26429	3.43042	0.599327	2.2953	5e-05	0.00026409	yes
CYP4F35P	CYP4F35P	CYP4F35P	chr18:14337422-14342524	WT	KO1	OK	5.72127	8.66288	0.598511	2.38783	5e-05	0.00026409	yes
KITLG	KITLG	KITLG	chr12:88492792-88580473	WT	KO1	OK	2.04695	3.09908	0.598366	2.25521	5e-05	0.00026409	yes
MAT2B	MAT2B	MAT2B	chr5:163503063-163519353	WT	KO1	OK	42.7965	64.7703	0.59784	2.67765	5e-05	0.00026409	yes
SREK1IP1	SREK1IP1	SREK1IP1	chr5:64690307-64768669	WT	KO1	OK	2.19673	3.32265	0.596978	2.3683	5e-05	0.00026409	yes
ODF3B	ODF3B	ODF3B	chr22:50530408-50532579	WT	KO1	OK	19.7093	29.8038	0.596619	2.3504	5e-05	0.00026409	yes
NNT	NNT	NNT	chr5:43573184-43705566	WT	KO1	OK	5.77143	8.72597	0.596387	2.36969	5e-05	0.00026409	yes
HMGN1	HMGN1	HMGN1	chr21:39342314-39349121	WT	KO1	OK	97.5769	147.47	0.59581	2.67778	5e-05	0.00026409	yes
TNFAIP8	TNFAIP8	TNFAIP8	chr5:119268691-119394604	WT	KO1	OK	13.6049	20.5486	0.594919	2.48008	5e-05	0.00026409	yes
SMAD7	SMAD7	SMAD7	chr18:48919852-48950711	WT	KO1	OK	9.79436	14.7903	0.594627	2.42661	5e-05	0.00026409	yes
PCMTD1	PCMTD1	PCMTD1	chr8:51817574-51899186	WT	KO1	OK	5.47155	8.24198	0.591041	2.40401	5e-05	0.00026409	yes
FOSB	FOSB	FOSB	chr19:45467994-45475179	WT	KO1	OK	7.1862	10.8191	0.590284	2.46333	5e-05	0.00026409	yes
RPS4Y1	RPS4Y1	RPS4Y1	chrY:2841581-2866956	WT	KO1	OK	137.295	206.633	0.58979	2.63415	5e-05	0.00026409	yes
IL4R	IL4R	IL4R	chr16:27313908-27364778	WT	KO1	OK	24.8604	37.4152	0.589774	2.6484	5e-05	0.00026409	yes
CTDSPL2	CTDSPL2	CTDSPL2	chr15:44427380-44527231	WT	KO1	OK	3.76799	5.66853	0.589178	2.35904	5e-05	0.00026409	yes
CTDSP2	CTDSP2	CTDSP2	chr12:57819926-57846964	WT	KO1	OK	45.3946	68.291	0.589174	2.6515	5e-05	0.00026409	yes
SERPINH1	SERPINH1	SERPINH1	chr11:75562055-75572804	WT	KO1	OK	60.3168	90.6903	0.588389	2.65647	5e-05	0.00026409	yes
TSPAN4	TSPAN4	TSPAN4	chr11:842823-867116	WT	KO1	OK	83.0372	124.722	0.586882	2.61499	5e-05	0.00026409	yes
ELMO2	ELMO2	ELMO2	chr20:46366044-46407051	WT	KO1	OK	11.6438	17.4881	0.586805	2.55324	5e-05	0.00026409	yes
SMIM14	SMIM14	SMIM14	chr4:39527838-39638998	WT	KO1	OK	12.9298	19.4155	0.586517	2.25283	5e-05	0.00026409	yes
ADM	ADM	ADM	chr11:10304979-10307402	WT	KO1	OK	32.7225	49.1165	0.585923	2.52471	5e-05	0.00026409	yes
SGSH	SGSH	SGSH	chr17:80169991-80220400	WT	KO1	OK	10.4303	15.654	0.585749	2.36646	5e-05	0.00026409	yes
NCK1	NCK1	NCK1	chr3:136862207-136951610	WT	KO1	OK	7.30756	10.9642	0.585342	2.47282	5e-05	0.00026409	yes
FAM49A	FAM49A	FAM49A	chr2:16549461-16665866	WT	KO1	OK	0.0394704	0.869917	4.46203	4.73239	0.0001	0.000504242	yes
USP30-AS1	USP30-AS1	USP30-AS1	chr12:109023088-109088026	WT	KO1	OK	1.57505	8.48019	2.4287	2.83877	0.0001	0.000504242	yes
TRIM36	TRIM36	TRIM36	chr5:115124761-115180546	WT	KO1	OK	0.217042	0.599472	1.46572	1.73647	0.0001	0.000504242	yes
LINC01348	LINC01348	LINC01348	chr1:235065473-235069818	WT	KO1	OK	0.936415	2.18581	1.22295	2.55162	0.0001	0.000504242	yes
TSNAXIP1	TSNAXIP1	TSNAXIP1	chr16:67806877-67828068	WT	KO1	OK	0.351401	0.785293	1.16011	1.98354	0.0001	0.000504242	yes
CAPS2	CAPS2	CAPS2	chr12:75275978-75390922	WT	KO1	OK	0.570413	1.2278	1.10599	2.46749	0.0001	0.000504242	yes
VSX1	VSX1	VSX1	chr20:25070885-25082379	WT	KO1	OK	0.60486	1.26707	1.06682	2.29517	0.0001	0.000504242	yes
ZNF799	ZNF799	ZNF799	chr19:12390013-12401274	WT	KO1	OK	1.05864	1.83447	0.793161	2.37598	0.0001	0.000504242	yes
MGMT	MGMT	MGMT	chr10:129467183-129767620	WT	KO1	OK	3.76022	6.37051	0.760591	2.52679	0.0001	0.000504242	yes
ZNF197	ZNF197	ZNF197	chr3:44625018-44648471	WT	KO1	OK	1.45467	2.36783	0.702869	2.32169	0.0001	0.000504242	yes
C5orf34	C5orf34	C5orf34	chr5:43486700-43515171	WT	KO1	OK	2.09291	3.32692	0.668674	2.24876	0.0001	0.000504242	yes
MPC1	MPC1	MPC1	chr6:166364919-166383013	WT	KO1	OK	6.71646	10.5196	0.647304	2.23523	0.0001	0.000504242	yes
C3orf62	C3orf62	C3orf62	chr3:49268596-49277075	WT	KO1	OK	1.38526	2.16268	0.642663	2.15655	0.0001	0.000504242	yes
COL12A1	COL12A1	COL12A1	chr6:75084325-75205907	WT	KO1	OK	1.16928	1.80609	0.627254	2.27392	0.0001	0.000504242	yes
FAT4	FAT4	FAT4	chr4:125316411-125492932	WT	KO1	OK	0.355817	0.548099	0.623303	2.15597	0.0001	0.000504242	yes
AP3M2	AP3M2	AP3M2	chr8:42152945-42171183	WT	KO1	OK	4.36282	6.69839	0.618555	2.45085	0.0001	0.000504242	yes
PLEKHF2	PLEKHF2	PLEKHF2	chr8:95133720-95156685	WT	KO1	OK	5.36565	8.21442	0.614406	2.44179	0.0001	0.000504242	yes
PCDH1	PCDH1	PCDH1	chr5:141853110-141878410	WT	KO1	OK	3.10356	4.72276	0.605707	2.2539	0.0001	0.000504242	yes
ZNF362	ZNF362	ZNF362	chr1:33256572-33300719	WT	KO1	OK	5.11693	7.76312	0.601357	2.38564	0.0001	0.000504242	yes
AMIGO2	AMIGO2	AMIGO2	chr12:47075706-47236663	WT	KO1	OK	82.5032	125.11	0.60068	2.44405	0.0001	0.000504242	yes
IL33	IL33	IL33	chr9:6215148-6257983	WT	KO1	OK	0.0452867	0.626108	3.78925	1.85804	0.00015	0.000731178	yes
ACKR3	ACKR3	ACKR3	chr2:236569736-236582351	WT	KO1	OK	0.213985	0.808237	1.91727	3.0155	0.00015	0.000731178	yes
IFNE	IFNE	IFNE	chr9:21454267-21559698	WT	KO1	OK	4.41941	11.362	1.3623	2.46401	0.00015	0.000731178	yes
CDH16	CDH16	CDH16	chr16:66908121-66918984	WT	KO1	OK	0.200351	0.499044	1.31664	1.78567	0.00015	0.000731178	yes
NEK10	NEK10	NEK10	chr3:27110902-27369460	WT	KO1	OK	0.380138	0.934722	1.29801	2.22468	0.00015	0.000731178	yes
IMMP2L	IMMP2L	IMMP2L	chr7:110663049-111562517	WT	KO1	OK	7.18662	16.151	1.16824	2.44928	0.00015	0.000731178	yes
RASD2	RASD2	RASD2	chr22:35541304-35553998	WT	KO1	OK	0.352954	0.76308	1.11235	2.53974	0.00015	0.000731178	yes
ITIH5	ITIH5	ITIH5	chr10:7559269-7666998	WT	KO1	OK	0.250485	0.518746	1.05031	2.21574	0.00015	0.000731178	yes
C4BPA	C4BPA	C4BPA	chr1:207104261-207144972	WT	KO1	OK	0.558708	1.12139	1.00512	2.40308	0.00015	0.000731178	yes
ZNF273	ZNF273	ZNF273	chr7:64903241-64931577	WT	KO1	OK	0.423214	0.763826	0.851857	2.28821	0.00015	0.000731178	yes
MYL12A	MYL12A	MYL12A	chr18:3247481-3278284	WT	KO1	OK	341.28	562.004	0.719623	2.17771	0.00015	0.000731178	yes
PCMTD2	PCMTD2	PCMTD2	chr20_KI270870v1_alt:164285-183433	WT	KO1	OK	0.897839	1.4469	0.688435	2.13778	0.00015	0.000731178	yes
KIF27	KIF27	KIF27	chr9:83836698-83921465	WT	KO1	OK	0.992516	1.58535	0.67564	2.23618	0.00015	0.000731178	yes
ZNF614	ZNF614	ZNF614	chr19:52013323-52028427	WT	KO1	OK	1.23188	1.96223	0.671631	2.3225	0.00015	0.000731178	yes
LACC1	LACC1	LACC1	chr13:43836352-43893932	WT	KO1	OK	2.46567	3.85357	0.644218	2.25007	0.00015	0.000731178	yes
GLCCI1	GLCCI1	GLCCI1	chr7:7949838-8089079	WT	KO1	OK	1.47835	2.30986	0.643816	2.2661	0.00015	0.000731178	yes
NBPF14	NBPF14	NBPF14	chr1:148531384-148595717	WT	KO1	OK	0.880239	1.36402	0.631902	2.34437	0.00015	0.000731178	yes
IDUA	IDUA	IDUA	chr4:979074-1004557	WT	KO1	OK	7.39086	11.4369	0.629882	2.37909	0.00015	0.000731178	yes
BFSP1	BFSP1	BFSP1	chr20:17493904-17569220	WT	KO1	OK	3.83586	5.8412	0.606712	2.16449	0.00015	0.000731178	yes
RRAGD	RRAGD	RRAGD	chr6:89364615-89412276	WT	KO1	OK	1.82619	2.78034	0.606425	2.24942	0.00015	0.000731178	yes
TULP4	TULP4	TULP4	chr6:158312659-158511824	WT	KO1	OK	1.29502	1.94674	0.588082	2.24194	0.00015	0.000731178	yes
DBET	DBET	DBET	chr4:190064501-190067864	WT	KO1	OK	0.213275	0.507282	1.25007	2.51113	0.0002	0.000952861	yes
TGFB3	TGFB3	TGFB3	chr14:75958096-75982022	WT	KO1	OK	0.318297	0.644545	1.01791	2.33439	0.0002	0.000952861	yes
GRAMD1C	GRAMD1C	GRAMD1C	chr3:113838833-113947174	WT	KO1	OK	0.365326	0.714591	0.967934	2.08562	0.0002	0.000952861	yes
FAM66C	FAM66C	FAM66C	chr12:8180208-8201000	WT	KO1	OK	0.479846	0.871888	0.86157	2.2228	0.0002	0.000952861	yes
ZNF713	ZNF713	ZNF713	chr7:55887276-55942226	WT	KO1	OK	0.494321	0.840603	0.765976	2.17856	0.0002	0.000952861	yes
ZNF699	ZNF699	ZNF699	chr19:9291139-9309714	WT	KO1	OK	0.478042	0.779322	0.705083	2.15868	0.0002	0.000952861	yes
ZNF607	ZNF607	ZNF607	chr19:37696362-37719790	WT	KO1	OK	1.05428	1.70756	0.695676	2.28593	0.0002	0.000952861	yes
TNFRSF1B	TNFRSF1B	TNFRSF1B	chr1:12166942-12209220	WT	KO1	OK	1.60718	2.53227	0.6559	2.27481	0.0002	0.000952861	yes
KIAA1644	KIAA1644	KIAA1644	chr22:44243676-44312851	WT	KO1	OK	0.95382	1.47908	0.63291	2.23055	0.0002	0.000952861	yes
EXOG	EXOG	EXOG	chr3:38496271-38526305	WT	KO1	OK	4.15913	6.2639	0.590779	2.27965	0.0002	0.000952861	yes
MAPK11	MAPK11	MAPK11	chr22:50263712-50270393	WT	KO1	OK	3.61143	5.42621	0.587375	2.14763	0.0002	0.000952861	yes
PYGO1	PYGO1	PYGO1	chr15:55538886-55588852	WT	KO1	OK	1.29091	1.93729	0.58565	2.23157	0.0002	0.000952861	yes
TEX19	TEX19	TEX19	chr17:82359246-82363776	WT	KO1	OK	0.197868	0.800246	2.01591	3.22646	0.00025	0.0011663	yes
FAP	FAP	FAP	chr2:162114440-162243535	WT	KO1	OK	0.261743	0.622896	1.25084	2.32763	0.00025	0.0011663	yes
ACTN2	ACTN2	ACTN2	chr1:236686453-236764627	WT	KO1	OK	0.348926	0.635032	0.863906	2.10873	0.00025	0.0011663	yes
SBK1	SBK1	SBK1	chr16:28292518-28323849	WT	KO1	OK	0.346873	0.62446	0.848201	2.27552	0.00025	0.0011663	yes
C18orf54	C18orf54	C18orf54	chr18:54357916-54382035	WT	KO1	OK	0.423801	0.714426	0.753397	1.98716	0.00025	0.0011663	yes
TCAF2	TCAF2	TCAF2	chr7:143620951-143730080	WT	KO1	OK	0.61602	1.03215	0.744611	2.23817	0.00025	0.0011663	yes
MAPK13	MAPK13	MAPK13	chr6:36130483-36144524	WT	KO1	OK	0.399242	0.664771	0.735594	2.10736	0.00025	0.0011663	yes
E2F8	E2F8	E2F8	chr11:19224062-19241655	WT	KO1	OK	2.34409	3.62292	0.628126	2.27232	0.00025	0.0011663	yes
FOXF2	FOXF2	FOXF2	chr6:1389833-1395597	WT	KO1	OK	3.56539	5.45585	0.613743	2.18928	0.00025	0.0011663	yes
ZC2HC1A	ZC2HC1A	ZC2HC1A	chr8:78666046-78719762	WT	KO1	OK	2.13117	3.20216	0.5874	2.08778	0.00025	0.0011663	yes
IL24	IL24	IL24	chr1:206897442-206922033	WT	KO1	OK	0.108921	1.17122	3.42666	2.51424	0.0003	0.0013724	yes
ZNF718	ZNF718	ZNF718	chr4:124475-202306	WT	KO1	OK	0.174448	0.500027	1.51921	1.69933	0.0003	0.0013724	yes
ZNF714	ZNF714	ZNF714	chr19:21082146-21125080	WT	KO1	OK	0.494354	1.2018	1.28158	1.78254	0.0003	0.0013724	yes
TMEM51-AS1	TMEM51-AS1	TMEM51-AS1	chr1:14598716-15152464	WT	KO1	OK	0.430809	1.01558	1.23718	2.45939	0.0003	0.0013724	yes
CST2	CST2	CST2	chr20:23823766-23826675	WT	KO1	OK	1.64931	3.52776	1.09689	2.32201	0.0003	0.0013724	yes
ZNF613	ZNF613	ZNF613	chr19:51927434-51945758	WT	KO1	OK	0.406481	0.845792	1.05711	2.2049	0.0003	0.0013724	yes
ZNF285	ZNF285	ZNF285	chr19:44385645-44401611	WT	KO1	OK	0.481372	0.930163	0.950332	2.18344	0.0003	0.0013724	yes
HAS3	HAS3	HAS3	chr16:69105563-69132590	WT	KO1	OK	9.58398	17.3898	0.859547	2.0716	0.0003	0.0013724	yes
ZNF44	ZNF44	ZNF44	chr19:12271809-12294899	WT	KO1	OK	0.602834	1.06398	0.819631	2.15187	0.0003	0.0013724	yes
BEND6	BEND6	BEND6	chr6:56954974-57027344	WT	KO1	OK	0.604858	1.049	0.794345	2.06329	0.0003	0.0013724	yes
AGAP5	AGAP5	AGAP5	chr10:73674274-73697796	WT	KO1	OK	0.921936	1.58203	0.779036	2.21487	0.0003	0.0013724	yes
ZNF549	ZNF549	ZNF549	chr19:57527324-57540876	WT	KO1	OK	0.642777	1.05603	0.716262	2.11028	0.0003	0.0013724	yes
DTX3L	DTX3L	DTX3L	chr3:122527910-122575202	WT	KO1	OK	42.8511	69.6807	0.701426	2.14281	0.0003	0.0013724	yes
GABPB2	GABPB2	GABPB2	chr1:151070577-151125545	WT	KO1	OK	2.09197	3.31006	0.661999	2.06976	0.0003	0.0013724	yes
MIR31HG	MIR31HG	MIR31HG	chr9:21454267-21559698	WT	KO1	OK	11.3014	17.5802	0.637449	2.25526	0.0003	0.0013724	yes
SLC2A8	SLC2A8	SLC2A8	chr9:127397137-127407891	WT	KO1	OK	4.13476	6.24468	0.594823	2.07383	0.0003	0.0013724	yes
RNF165	RNF165	RNF165	chr18:46334223-46460820	WT	KO1	OK	0.013958	0.897831	6.00728	1.84667	0.00035	0.00157268	yes
GPR153	GPR153	GPR153	chr1:6247345-6260975	WT	KO1	OK	0.327008	0.629038	0.943821	2.34085	0.00035	0.00157268	yes
FLJ16779	FLJ16779	FLJ16779	chr20:63240783-63261615	WT	KO1	OK	0.53236	0.950751	0.836665	2.11084	0.00035	0.00157268	yes
LHX4-AS1	LHX4-AS1	LHX4-AS1	chr1:180230297-180275053	WT	KO1	OK	1.58278	2.68655	0.763293	2.1323	0.00035	0.00157268	yes
KIF20A	KIF20A	KIF20A	chr5:138178727-138213343	WT	KO1	OK	11.1172	18.6907	0.749527	2.00426	0.00035	0.00157268	yes
PHF10	PHF10	PHF10	chr6:169702111-169724010	WT	KO1	OK	13.6765	21.7035	0.666226	1.98452	0.00035	0.00157268	yes
ANKRD20A5P	ANKRD20A5P	ANKRD20A5P	chr18:14179096-14227050	WT	KO1	OK	0.98595	1.54599	0.648948	2.0195	0.00035	0.00157268	yes
SLC6A8	SLC6A8	SLC6A8	chrX:153688296-153696593	WT	KO1	OK	1.74805	2.73693	0.646811	2.20123	0.00035	0.00157268	yes
RGS12	RGS12	RGS12	chr4:3314146-3439913	WT	KO1	OK	1.72954	2.65196	0.616673	2.08393	0.00035	0.00157268	yes
GLT8D2	GLT8D2	GLT8D2	chr12:103988982-104064177	WT	KO1	OK	0.0761151	0.7823	3.36147	3.39377	0.0004	0.00176317	yes
SAA2	SAA2	SAA2	chr11:18231354-18248674	WT	KO1	OK	0.458979	2.40621	2.39026	2.38981	0.0004	0.00176317	yes
LOC105369739	LOC105369739	LOC105369739	chr12:42692215-42717119	WT	KO1	OK	0.627923	1.52244	1.27772	2.25547	0.0004	0.00176317	yes
SPIN2B	SPIN2B	SPIN2B	chrX:57119681-57121556	WT	KO1	OK	0.987821	1.95584	0.98547	1.92235	0.0004	0.00176317	yes
MIRLET7DHG	MIRLET7DHG	MIRLET7DHG	chr9:94176569-94204566	WT	KO1	OK	1.27998	2.33287	0.865983	2.0077	0.0004	0.00176317	yes
COMMD3	COMMD3	COMMD3	chr10:22316382-22331485	WT	KO1	OK	38.3432	63.8414	0.73552	2.09002	0.0004	0.00176317	yes
ZNF502	ZNF502	ZNF502	chr3:44712642-44723831	WT	KO1	OK	0.86177	1.39706	0.697015	2.03575	0.0004	0.00176317	yes
SLC22A17	SLC22A17	SLC22A17	chr14:23346310-23352912	WT	KO1	OK	3.14929	4.79114	0.605344	2.06197	0.0004	0.00176317	yes
POPDC2	POPDC2	POPDC2	chr3:119642051-119660590	WT	KO1	OK	0.218557	0.729411	1.73872	2.48423	0.00045	0.0019618	yes
CBX3P2	CBX3P2	CBX3P2	chr18:2652169-2655395	WT	KO1	OK	0.435841	1.10634	1.34392	2.51107	0.00045	0.0019618	yes
BCL2L15	BCL2L15	BCL2L15	chr1:113812611-113914086	WT	KO1	OK	1.65232	3.38669	1.03539	2.01462	0.00045	0.0019618	yes
LOC90768	LOC90768	LOC90768	chr4:182138659-182144515	WT	KO1	OK	0.329051	0.568239	0.788186	2.03386	0.00045	0.0019618	yes
TNFRSF8	TNFRSF8	TNFRSF8	chr1:12063376-12144207	WT	KO1	OK	0.613751	1.01376	0.723994	1.96397	0.00045	0.0019618	yes
BEGAIN	BEGAIN	BEGAIN	chr14:100537146-100569794	WT	KO1	OK	0.908664	1.49362	0.716995	1.99795	0.00045	0.0019618	yes
IQSEC3	IQSEC3	IQSEC3	chr12_GL877875v1_alt:60897-165343	WT	KO1	OK	0.413631	0.674808	0.706133	2.06563	0.00045	0.0019618	yes
LACE1	LACE1	LACE1	chr6:108294873-108525784	WT	KO1	OK	0.465223	0.752814	0.694371	2.00921	0.00045	0.0019618	yes
ZNF595	ZNF595	ZNF595	chr4:53284-88211	WT	KO1	OK	1.39598	2.15621	0.627222	2.00287	0.00045	0.0019618	yes
ALDH6A1	ALDH6A1	ALDH6A1	chr14:74019355-74084493	WT	KO1	OK	2.19979	3.36438	0.612975	2.00471	0.00045	0.0019618	yes
LSM11	LSM11	LSM11	chr5:157743694-157760709	WT	KO1	OK	1.00089	1.50945	0.592735	2.09613	0.00045	0.0019618	yes
CDKL3	CDKL3	CDKL3	chr5:134298423-134371047	WT	KO1	OK	1.34053	2.26775	0.758459	2.07729	0.0005	0.0021588	yes
LYRM1	LYRM1	LYRM1	chr16:20854924-20925011	WT	KO1	OK	14.5052	23.0084	0.665596	1.99344	0.0005	0.0021588	yes
CCDC144B	CCDC144B	CCDC144B	chr17:18537800-18625617	WT	KO1	OK	0.464698	0.728356	0.64835	1.98127	0.0005	0.0021588	yes
MTHFD2L	MTHFD2L	MTHFD2L	chr4:74158111-74303097	WT	KO1	OK	1.02139	1.69029	0.726739	2.10899	0.00055	0.00234699	yes
ITGAM	ITGAM	ITGAM	chr16:31259966-31332892	WT	KO1	OK	0.948651	1.45735	0.619395	2.02548	0.00055	0.00234699	yes
NICN1	NICN1	NICN1	chr3:49416777-49429324	WT	KO1	OK	3.37039	5.06808	0.588524	2.04145	0.00055	0.00234699	yes
TTLL11	TTLL11	TTLL11	chr9:121821924-122093606	WT	KO1	OK	0.656826	1.18592	0.852421	2.08407	0.0006	0.00253469	yes
LAG3	LAG3	LAG3	chr12:6772503-6778455	WT	KO1	OK	1.06857	1.79066	0.74481	2.03678	0.0006	0.00253469	yes
PCYOX1L	PCYOX1L	PCYOX1L	chr5:149358006-149369658	WT	KO1	OK	1.45377	2.29806	0.660616	2.06569	0.0006	0.00253469	yes
CEP57L1	CEP57L1	CEP57L1	chr6:109095152-109163912	WT	KO1	OK	1.77053	2.72232	0.62066	2.01496	0.0006	0.00253469	yes
TMEM190	TMEM190	TMEM190	chr19:55376835-55378244	WT	KO1	OK	2.12464	4.3224	1.02461	2.19652	0.00065	0.0027154	yes
CREG2	CREG2	CREG2	chr2:101348353-101387503	WT	KO1	OK	0.298014	0.600064	1.00974	2.292	0.00065	0.0027154	yes
CD22	CD22	CD22	chr19:35329165-35347361	WT	KO1	OK	0.41424	0.748787	0.854088	1.83939	0.00065	0.0027154	yes
C19orf71	C19orf71	C19orf71	chr19:3539156-3544030	WT	KO1	OK	5.35352	8.60046	0.683926	2.01147	0.00065	0.0027154	yes
PAXIP1-AS1	PAXIP1-AS1	PAXIP1-AS1	chr7:155003432-155005703	WT	KO1	OK	1.41619	2.21446	0.644942	1.95349	0.00065	0.0027154	yes
GOPC	GOPC	GOPC	chr6:117482603-117602542	WT	KO1	OK	6.92854	10.5506	0.606704	2.05882	0.00065	0.0027154	yes
C1orf204	C1orf204	C1orf204	chr1:159826688-159862657	WT	KO1	OK	0.338642	0.794758	1.23075	2.13855	0.0007	0.00290334	yes
ANTXR2	ANTXR2	ANTXR2	chr4:79901616-80073472	WT	KO1	OK	2.25569	3.51038	0.638059	1.92393	0.0007	0.00290334	yes
BDKRB1	BDKRB1	BDKRB1	chr14:96256209-96264763	WT	KO1	OK	3.35544	5.19567	0.630808	2.00932	0.0007	0.00290334	yes
TNIK	TNIK	TNIK	chr3:171058413-171460408	WT	KO1	OK	0.521508	1.12936	1.11474	2.01608	0.00075	0.00308496	yes
TUSC1	TUSC1	TUSC1	chr9:25676388-25678858	WT	KO1	OK	1.68954	2.60548	0.624914	2.00573	0.00075	0.00308496	yes
LUCAT1	LUCAT1	LUCAT1	chr5:91302985-91314402	WT	KO1	OK	11.6776	17.6784	0.598246	1.92732	0.00075	0.00308496	yes
KAT14	KAT14	KAT14	chr20:18137854-18188387	WT	KO1	OK	4.69981	7.3798	0.65098	1.99519	0.0008	0.00326551	yes
ATXN7L1	ATXN7L1	ATXN7L1	chr7:105604773-105876585	WT	KO1	OK	3.23293	5.04032	0.640671	1.91619	0.0008	0.00326551	yes
ZNF25	ZNF25	ZNF25	chr10:37949866-37976525	WT	KO1	OK	1.1951	1.80907	0.598109	1.94773	0.0008	0.00326551	yes
NPBWR1	NPBWR1	NPBWR1	chr8:52939907-52940894	WT	KO1	OK	0.294203	1.71486	2.5432	3.28619	0.00085	0.00344032	yes
LOC105378853	LOC105378853	LOC105378853	chr1:90782983-90851638	WT	KO1	OK	0.482115	2.15563	2.16066	2.51138	0.00085	0.00344032	yes
HPX	HPX	HPX	chr11:6431037-6441024	WT	KO1	OK	0.241435	0.864922	1.84094	2.91411	0.00085	0.00344032	yes
IL18BP	IL18BP	IL18BP	chr11:71998911-72112776	WT	KO1	OK	54.963	130.906	1.252	2.06272	0.00085	0.00344032	yes
C5orf49	C5orf49	C5orf49	chr5:7830378-7851490	WT	KO1	OK	0.341747	0.727404	1.08983	2.23615	0.00085	0.00344032	yes
LOC100270804	LOC100270804	LOC100270804	chr20:18787970-18796065	WT	KO1	OK	0.746902	1.30719	0.807475	1.95679	0.00085	0.00344032	yes
HTRA3	HTRA3	HTRA3	chr4:8269764-8307111	WT	KO1	OK	1.27237	2.0235	0.669333	2.0065	0.00085	0.00344032	yes
BTBD19	BTBD19	BTBD19	chr1:44808481-44814129	WT	KO1	OK	2.7545	4.25535	0.627487	2.00954	0.00085	0.00344032	yes
TMOD2	TMOD2	TMOD2	chr15:51751560-51816361	WT	KO1	OK	0.513003	0.772302	0.590197	1.96769	0.00085	0.00344032	yes
ZNF519	ZNF519	ZNF519	chr18:14075989-14132490	WT	KO1	OK	0.230671	0.502514	1.12333	2.04707	0.0009	0.00362057	yes
GATA2	GATA2	GATA2	chr3:128479421-128503207	WT	KO1	OK	0.58948	0.975525	0.726736	1.77001	0.0009	0.00362057	yes
LRRC37A3	LRRC37A3	LRRC37A3	chr17:64854311-64919480	WT	KO1	OK	1.34791	2.07726	0.623963	1.91547	0.0009	0.00362057	yes
MYO16-AS1	MYO16-AS1	MYO16-AS1	chr13:108596151-109208007	WT	KO1	OK	1.23415	3.44645	1.4816	2.16689	0.00095	0.00379318	yes
CERKL	CERKL	CERKL	chr2:181456891-181657107	WT	KO1	OK	0.414121	0.936355	1.177	1.89732	0.00095	0.00379318	yes
GNAZ	GNAZ	GNAZ	chr22:23059414-23142054	WT	KO1	OK	0.528904	0.961503	0.862285	2.0974	0.00095	0.00379318	yes
PINLYP	PINLYP	PINLYP	chr19:43576799-43582104	WT	KO1	OK	2.59341	4.62848	0.835688	1.82646	0.00095	0.00379318	yes
SMIM19	SMIM19	SMIM19	chr8:42416461-42552997	WT	KO1	OK	23.1971	39.2406	0.758403	2.04901	0.00095	0.00379318	yes
DHRS2	DHRS2	DHRS2	chr14:23630114-23645639	WT	KO1	OK	1.1298	1.9111	0.758334	1.96401	0.00095	0.00379318	yes
GJB2	GJB2	GJB2	chr13:20187464-20192975	WT	KO1	OK	0.737005	1.24399	0.755234	1.98368	0.00095	0.00379318	yes
LRP5L	LRP5L	LRP5L	chr22:25351417-25381577	WT	KO1	OK	3.72018	5.61883	0.5949	1.92533	0.00095	0.00379318	yes
PRR16	PRR16	PRR16	chr5:120464277-120687330	WT	KO1	OK	0.0484571	0.673308	3.79649	1.84695	0.001	0.00397229	yes
DGAT2	DGAT2	DGAT2	chr11:75768732-75801536	WT	KO1	OK	0.499314	0.903564	0.855679	1.89643	0.001	0.00397229	yes
SOD2	SOD2	SOD2	chr6:159679063-159789703	WT	KO1	OK	209.188	359.425	0.780892	1.94232	0.001	0.00397229	yes
AKR1C8P	AKR1C8P	AKR1C8P	chr10:5154459-5185187	WT	KO1	OK	0.432733	0.830272	0.940108	2.01849	0.00105	0.00414604	yes
SSR4P1	SSR4P1	SSR4P1	chr21:45070955-45073211	WT	KO1	OK	0.469635	0.877449	0.901776	2.0207	0.0011	0.00432505	yes
ERMAP	ERMAP	ERMAP	chr1:42807051-42844989	WT	KO1	OK	4.155	6.36606	0.615552	1.91363	0.0011	0.00432505	yes
PAQR6	PAQR6	PAQR6	chr1:156212987-156248117	WT	KO1	OK	11.2399	18.3224	0.704986	1.94484	0.00115	0.00450001	yes
AIM2	AIM2	AIM2	chr1:159062484-159076857	WT	KO1	OK	0.31451	0.861336	1.45347	2.23873	0.0012	0.00466808	yes
PTCSC3	PTCSC3	PTCSC3	chr14:36070426-36176651	WT	KO1	OK	0.856895	1.70689	0.994182	2.09491	0.00125	0.00484632	yes
ZNF474	ZNF474	ZNF474	chr5:122129512-122153571	WT	KO1	OK	0.276061	0.615202	1.15607	1.95612	0.0013	0.00501223	yes
POLK	POLK	POLK	chr5:75371102-75599821	WT	KO1	OK	6.37615	10.6921	0.745794	1.84375	0.0013	0.00501223	yes
HAS2-AS1	HAS2-AS1	HAS2-AS1	chr8:121613030-121645324	WT	KO1	OK	0.457284	1.56066	1.77099	1.94549	0.00135	0.00518775	yes
LOC101928710	LOC101928710	LOC101928710	chr17:78617383-78632057	WT	KO1	OK	0.199026	0.714224	1.84342	1.86499	0.0014	0.00536063	yes
IQCK	IQCK	IQCK	chr16:19706351-19858467	WT	KO1	OK	4.58811	7.65467	0.73844	1.83888	0.0014	0.00536063	yes
B3GALT5	B3GALT5	B3GALT5	chr21:39612939-39662889	WT	KO1	OK	0.802551	1.25037	0.63969	1.76365	0.0014	0.00536063	yes
SNORD6	SNORD6	SNORD6	chr11:93731502-93731573	WT	KO1	OK	0	164.386	inf	-nan	0.00145	0.0055096	yes
LOC100996351	LOC100996351	LOC100996351	chr19:3136031-3163769	WT	KO1	OK	0.115071	0.65535	2.50975	2.75755	0.00145	0.0055096	yes
RIC3	RIC3	RIC3	chr11:8038632-8169043	WT	KO1	OK	0.337092	0.903517	1.42241	2.07483	0.00145	0.0055096	yes
GSG1	GSG1	GSG1	chr12:13083536-13103696	WT	KO1	OK	0.410399	0.73518	0.841071	1.48327	0.00145	0.0055096	yes
TRAM2-AS1	TRAM2-AS1	TRAM2-AS1	chr6:52577201-52583993	WT	KO1	OK	1.46551	2.25806	0.62368	1.85068	0.00145	0.0055096	yes
CDRT1	CDRT1	CDRT1	chr17:15565481-15619704	WT	KO1	OK	1.29641	1.97713	0.608883	1.89636	0.00145	0.0055096	yes
PSTK	PSTK	PSTK	chr10:122980039-122990391	WT	KO1	OK	2.13126	3.23103	0.600286	1.85659	0.00145	0.0055096	yes
SPC24	SPC24	SPC24	chr19:11145493-11155812	WT	KO1	OK	5.85277	8.80772	0.58965	1.87013	0.00145	0.0055096	yes
ELAC1	ELAC1	ELAC1	chr18:50968016-50988120	WT	KO1	OK	1.77719	2.6693	0.586864	1.86407	0.00145	0.0055096	yes
C19orf38	C19orf38	C19orf38	chr19:10848429-10869684	WT	KO1	OK	0.907121	1.75215	0.949763	1.98489	0.0015	0.00567787	yes
GATA6-AS1	GATA6-AS1	GATA6-AS1	chr18:22166897-22168968	WT	KO1	OK	0.213433	0.692876	1.69882	2.56362	0.00155	0.00584486	yes
FAM120C	FAM120C	FAM120C	chrX:54068323-54183281	WT	KO1	OK	2.56334	4.62982	0.85293	1.83056	0.00155	0.00584486	yes
SUPT3H	SUPT3H	SUPT3H	chr6:44826729-45551082	WT	KO1	OK	1.28464	2.23462	0.798663	1.93903	0.00155	0.00584486	yes
CHST1	CHST1	CHST1	chr11:45647688-45665656	WT	KO1	OK	0.529201	0.848813	0.68163	1.8908	0.00155	0.00584486	yes
HOXA-AS2	HOXA-AS2	HOXA-AS2	chr7:27106189-27130780	WT	KO1	OK	3.23337	7.90237	1.28925	1.93482	0.0016	0.00599925	yes
DDO	DDO	DDO	chr6:110392179-110415550	WT	KO1	OK	0.579861	1.13513	0.969079	1.84219	0.0016	0.00599925	yes
SLF2	SLF2	SLF2	chr10:100912568-100965134	WT	KO1	OK	3.80529	6.06963	0.673605	1.77066	0.00165	0.00616015	yes
CASC2	CASC2	CASC2	chr10:118046820-118210153	WT	KO1	OK	0.325909	0.620946	0.93	1.76867	0.0017	0.00631292	yes
LINC00680	LINC00680	LINC00680	chr6:57908552-57961446	WT	KO1	OK	1.94147	3.15577	0.700841	1.77494	0.0017	0.00631292	yes
MYL5	MYL5	MYL5	chr4:677921-689441	WT	KO1	OK	10.0357	15.532	0.630108	1.8024	0.0017	0.00631292	yes
AVIL	AVIL	AVIL	chr12:57782744-57816069	WT	KO1	OK	1.10177	3.18562	1.53175	2.0664	0.00175	0.00647957	yes
DTL	DTL	DTL	chr1:211940398-212105006	WT	KO1	OK	5.30044	8.32803	0.651865	1.83261	0.00175	0.00647957	yes
FAAH2	FAAH2	FAAH2	chrX:57286676-57489196	WT	KO1	OK	0.40203	0.787751	0.970436	1.95789	0.00185	0.00680634	yes
XKR9	XKR9	XKR9	chr8:70669364-70735942	WT	KO1	OK	0.539488	0.876913	0.700842	1.71283	0.00185	0.00680634	yes
SLCO1B7	SLCO1B7	SLCO1B7	chr12:21015695-21090106	WT	KO1	OK	1.8768	2.85363	0.604524	1.87091	0.00185	0.00680634	yes
SPATA9	SPATA9	SPATA9	chr5:95646776-95683010	WT	KO1	OK	0.130668	0.540643	2.04877	1.66198	0.0019	0.00696633	yes
FAM86HP	FAM86HP	FAM86HP	chr3:130081830-130111433	WT	KO1	OK	0.311733	0.750142	1.26685	1.91739	0.0019	0.00696633	yes
PLIN5	PLIN5	PLIN5	chr19:4522530-4535196	WT	KO1	OK	0.290819	0.588055	1.01583	1.94345	0.00195	0.00712898	yes
HAGHL	HAGHL	HAGHL	chr16:726935-729715	WT	KO1	OK	1.93375	2.98803	0.627795	1.65567	0.00195	0.00712898	yes
APLF	APLF	APLF	chr2:68467558-68580162	WT	KO1	OK	0.728931	1.11592	0.614376	1.83052	0.00195	0.00712898	yes
TMSB4Y	TMSB4Y	TMSB4Y	chrY:13703566-13706022	WT	KO1	OK	0.497306	0.9588	0.947096	1.91966	0.00205	0.00745732	yes
LINC01508	LINC01508	LINC01508	chr9:90300895-90433489	WT	KO1	OK	0.433925	1.21609	1.48673	2.14529	0.00215	0.00777635	yes
LGALS9C	LGALS9C	LGALS9C	chr17:18476784-18494945	WT	KO1	OK	0.188788	0.548277	1.53813	2.16215	0.00225	0.00808129	yes
LOC653160	LOC653160	LOC653160	chr1:34975698-34978706	WT	KO1	OK	0.730948	1.24975	0.773799	1.8688	0.00225	0.00808129	yes
CLUHP3	CLUHP3	CLUHP3	chr16:31700612-31707424	WT	KO1	OK	1.80161	2.71581	0.592097	1.78244	0.0023	0.00824384	yes
IFNA1	IFNA1	IFNA1	chr9:21440453-21441316	WT	KO1	OK	0.319239	1.47833	2.21126	2.46623	0.00235	0.00839708	yes
CERS1	CERS1	CERS1	chr19:18868545-18896727	WT	KO1	OK	0.300598	0.652046	1.11714	1.78499	0.00235	0.00839708	yes
HEXB	HEXB	HEXB	chr5:74627405-74776912	WT	KO1	OK	78.8647	127.745	0.695815	1.73164	0.00235	0.00839708	yes
FNDC10	FNDC10	FNDC10	chr1:1598007-1600096	WT	KO1	OK	1.22643	1.87916	0.615627	1.76677	0.00235	0.00839708	yes
C1orf132	C1orf132	C1orf132	chr1:207801517-207822703	WT	KO1	OK	0.885215	1.43546	0.697415	1.77934	0.0024	0.00855158	yes
PIGZ	PIGZ	PIGZ	chr3:196946342-196968871	WT	KO1	OK	0.739191	1.16016	0.650299	1.78584	0.0024	0.00855158	yes
CH17-360D5.1	CH17-360D5.1	CH17-360D5.1	chr10:47918738-47923524	WT	KO1	OK	0.282945	0.708918	1.3251	1.94483	0.00245	0.00870742	yes
MIR210HG	MIR210HG	MIR210HG	chr11_KI270832v1_alt:95311-98112	WT	KO1	OK	0.209047	0.502792	1.26613	2.07244	0.00245	0.00870742	yes
LOC101929125	LOC101929125	LOC101929125	chr20:3808493-3812434	WT	KO1	OK	0.797264	1.89626	1.25003	1.96755	0.00245	0.00870742	yes
C10orf107	C10orf107	C10orf107	chr10:61662960-61766333	WT	KO1	OK	0.388629	0.986578	1.34404	2.04462	0.0025	0.00885345	yes
LOC105377763	LOC105377763	LOC105377763	chr5:179657761-179674295	WT	KO1	OK	0.652363	1.50223	1.20336	1.83152	0.0025	0.00885345	yes
PALMD	PALMD	PALMD	chr1:99516983-99765793	WT	KO1	OK	0.485369	1.0944	1.17299	1.94071	0.0025	0.00885345	yes
LOC102724814	LOC102724814	LOC102724814	chr14:23511759-23578800	WT	KO1	OK	14.679	23.0054	0.648224	1.73364	0.0025	0.00885345	yes
NKAPP1	NKAPP1	NKAPP1	chrX:120236455-120245267	WT	KO1	OK	0.69428	1.13838	0.71339	1.84509	0.00255	0.00901445	yes
GLI3	GLI3	GLI3	chr7:41960949-42237019	WT	KO1	OK	0.0183129	1.11595	5.92927	6.90294	0.0026	0.00914471	yes
FOXG1	FOXG1	FOXG1	chr14:28767071-28770277	WT	KO1	OK	0.0164619	0.552645	5.06915	2.52916	0.0026	0.00914471	yes
TLL1	TLL1	TLL1	chr4:165873257-166104457	WT	KO1	OK	0.0230723	0.674917	4.87048	2.01286	0.0026	0.00914471	yes
NRIP3	NRIP3	NRIP3	chr11:8980575-9004049	WT	KO1	OK	0.611341	0.947676	0.632417	1.79814	0.0026	0.00914471	yes
CATSPER1	CATSPER1	CATSPER1	chr11:66016751-66026517	WT	KO1	OK	0.884081	1.36505	0.626697	1.78375	0.0026	0.00914471	yes
PLCG1	PLCG1	PLCG1	chr20:41028821-41175717	WT	KO1	OK	9.3323	16.5634	0.827693	1.69457	0.00265	0.00929706	yes
OR52K2	OR52K2	OR52K2	chr11:4449294-4450361	WT	KO1	OK	0.170768	0.665474	1.96234	1.85222	0.0027	0.0094534	yes
ZNF420	ZNF420	ZNF420	chr19:37078479-37129749	WT	KO1	OK	0.452316	0.746599	0.723001	1.74327	0.00275	0.00959464	yes
ANKDD1A	ANKDD1A	ANKDD1A	chr15:64911901-64958699	WT	KO1	OK	0.832837	1.25914	0.596335	1.74594	0.0028	0.00975197	yes
CABP1	CABP1	CABP1	chr12:120640618-120667324	WT	KO1	OK	0.438191	0.991959	1.17872	1.53272	0.00285	0.00990131	yes
LOC105372751	LOC105372751	LOC105372751	chr21:24428739-24547942	WT	KO1	OK	0.623484	0.984979	0.65974	1.67376	0.00285	0.00990131	yes
PRDM8	PRDM8	PRDM8	chr4:80185269-80204328	WT	KO1	OK	0.391878	0.661316	0.754937	1.7353	0.0029	0.0100599	yes
HLA-C	HLA-C	HLA-C	chr6_GL000256v2_alt:2570706-2574084	WT	KO1	OK	0.432499	0.850325	0.975317	1.81777	0.00295	0.0102232	yes
HTRA4	HTRA4	HTRA4	chr8:38974148-38988662	WT	KO1	OK	0.521785	0.908269	0.799663	1.79384	0.00295	0.0102232	yes
KLRA1P	KLRA1P	KLRA1P	chr12:10588477-10599835	WT	KO1	OK	0.314573	0.612051	0.960257	1.82432	0.003	0.0103732	yes
VRK2	VRK2	VRK2	chr2:57907650-58241380	WT	KO1	OK	14.3377	21.8412	0.607238	1.71485	0.003	0.0103732	yes
IGIP	IGIP	IGIP	chr5:140125935-140128806	WT	KO1	OK	0.949848	1.43371	0.593986	1.73538	0.003	0.0103732	yes
EYA2	EYA2	EYA2	chr20:46894623-47188844	WT	KO1	OK	0.856431	1.29777	0.599627	1.68223	0.00305	0.0105199	yes
ZNF547	ZNF547	ZNF547	chr19:57363434-57379557	WT	KO1	OK	0.12958	0.638984	2.30194	2.21228	0.0031	0.0106712	yes
KCNMA1	KCNMA1	KCNMA1	chr10:76869600-77637819	WT	KO1	OK	8.61055	14.0244	0.70376	1.63217	0.0031	0.0106712	yes
LINC01503	LINC01503	LINC01503	chr9:129336922-129347477	WT	KO1	OK	3.39345	5.32974	0.651312	1.73253	0.0031	0.0106712	yes
IGFL4	IGFL4	IGFL4	chr19:46039747-46041016	WT	KO1	OK	0.788897	2.49867	1.66325	2.39975	0.00325	0.011116	yes
FANK1	FANK1	FANK1	chr10:125896538-126009592	WT	KO1	OK	1.66226	2.59402	0.642042	1.7197	0.00335	0.0114187	yes
FAM57B	FAM57B	FAM57B	chr16:30023333-30030865	WT	KO1	OK	0.174925	0.60472	1.78953	2.07453	0.0034	0.0115721	yes
UBQLNL	UBQLNL	UBQLNL	chr11:5514392-5516726	WT	KO1	OK	0.244876	0.504122	1.04172	1.79899	0.0037	0.01245	yes
SGMS1-AS1	SGMS1-AS1	SGMS1-AS1	chr10:50624950-50631636	WT	KO1	OK	0.450708	0.756758	0.747638	1.7188	0.0037	0.01245	yes
C16orf95	C16orf95	C16orf95	chr16:87302797-87317420	WT	KO1	OK	2.73403	4.17287	0.610009	1.65528	0.0037	0.01245	yes
LINC01358	LINC01358	LINC01358	chr1:59020475-59088247	WT	KO1	OK	0.55194	1.99706	1.8553	1.74037	0.00375	0.0125817	yes
CATSPER3	CATSPER3	CATSPER3	chr5:134967905-135011707	WT	KO1	OK	0.490215	0.981184	1.00111	1.80241	0.0038	0.0127341	yes
LINC00847	LINC00847	LINC00847	chr5:180829953-180835726	WT	KO1	OK	5.4209	9.06308	0.74147	1.69857	0.00385	0.0128799	yes
LOC100129935	LOC100129935	LOC100129935	chr19:39638684-39642401	WT	KO1	OK	0.159749	0.530312	1.73104	2.11716	0.00395	0.0131733	yes
PQLC2L	PQLC2L	PQLC2L	chr3:157543343-157601232	WT	KO1	OK	0.29599	0.842011	1.50829	1.61708	0.00395	0.0131733	yes
INHBA	INHBA	INHBA	chr7:41689002-41779378	WT	KO1	OK	0.0658362	0.644865	3.29204	3.23259	0.0041	0.0136083	yes
CTRC	CTRC	CTRC	chr1:15438441-15446658	WT	KO1	OK	0.326935	1.34591	2.04151	2.35903	0.0041	0.0136083	yes
CRYAB	CRYAB	CRYAB	chr11:111908619-111926871	WT	KO1	OK	0.62761	1.46645	1.22439	1.77395	0.0042	0.0138905	yes
LINC00511	LINC00511	LINC00511	chr17:72598040-72640472	WT	KO1	OK	0.456093	0.79041	0.793272	1.74416	0.0042	0.0138905	yes
GLIPR1L2	GLIPR1L2	GLIPR1L2	chr12:75391069-75432397	WT	KO1	OK	1.15625	1.76602	0.611048	1.63895	0.0042	0.0138905	yes
C8orf48	C8orf48	C8orf48	chr8:13566842-13568288	WT	KO1	OK	0.129844	0.693091	2.41627	2.33451	0.0043	0.0141841	yes
ZNF503-AS2	ZNF503-AS2	ZNF503-AS2	chr10:75279725-75408982	WT	KO1	OK	0.7722	2.2101	1.51706	1.71824	0.00435	0.0143252	yes
LOC101928131	LOC101928131	LOC101928131	chr4:165684638-165762778	WT	KO1	OK	0.476393	1.09123	1.19573	1.9404	0.00455	0.0148712	yes
LINC01176	LINC01176	LINC01176	chr7:30390884-30404054	WT	KO1	OK	1.09724	2.12845	0.955921	1.69599	0.00475	0.0154558	yes
PLPPR3	PLPPR3	PLPPR3	chr19:812487-821952	WT	KO1	OK	0.273559	0.522872	0.934608	1.40957	0.00475	0.0154558	yes
ZNF879	ZNF879	ZNF879	chr5:179023774-179034387	WT	KO1	OK	0.40953	0.701386	0.776239	1.74742	0.00485	0.015715	yes
ADAM1A	ADAM1A	ADAM1A	chr12:111899062-111901902	WT	KO1	OK	0.787524	1.19344	0.599729	1.66549	0.0052	0.0166781	yes
QRICH2	QRICH2	QRICH2	chr17:76274048-76307680	WT	KO1	OK	0.360363	0.65864	0.87004	1.66483	0.00535	0.0171079	yes
ZNF333	ZNF333	ZNF333	chr19:14690039-14778541	WT	KO1	OK	1.16944	1.76007	0.589821	1.63468	0.0055	0.0175312	yes
PROCA1	PROCA1	PROCA1	chr17:28703196-28711907	WT	KO1	OK	0.554784	0.943425	0.765981	1.42001	0.00555	0.0176663	yes
ATF5	ATF5	ATF5	chr19:49889655-49933936	WT	KO1	OK	28.9128	46.3254	0.680096	1.59727	0.00555	0.0176663	yes
FAM216A	FAM216A	FAM216A	chr12:110452485-110490387	WT	KO1	OK	4.8113	8.29599	0.785987	1.63131	0.00565	0.0179312	yes
AGAP4	AGAP4	AGAP4	chr10:45825591-45853877	WT	KO1	OK	0.629979	0.968037	0.619758	1.5975	0.00565	0.0179312	yes
TMEM255B	TMEM255B	TMEM255B	chr13:113759242-113811926	WT	KO1	OK	0.275818	1.01714	1.88273	2.16467	0.0059	0.0186184	yes
JPX	JPX	JPX	chrX:73944323-74293574	WT	KO1	OK	1.80634	2.93047	0.698065	1.61978	0.00605	0.0190055	yes
PGAM2	PGAM2	PGAM2	chr7:44062726-44065587	WT	KO1	OK	1.20935	2.10318	0.79834	1.63688	0.0061	0.0191366	yes
APOBEC3G	APOBEC3G	APOBEC3G	chr22:39077004-39087743	WT	KO1	OK	0.622483	1.03897	0.739045	1.66339	0.00615	0.0192674	yes
PAPPA-AS1	PAPPA-AS1	PAPPA-AS1	chr9:116153791-116402321	WT	KO1	OK	24.2816	37.2149	0.616017	1.57138	0.00615	0.0192674	yes
AURKC	AURKC	AURKC	chr19:57231008-57235548	WT	KO1	OK	0.392618	0.912232	1.21627	1.72949	0.00645	0.0200537	yes
SLC15A3	SLC15A3	SLC15A3	chr11:60924440-60951785	WT	KO1	OK	6.41746	16.0666	1.32399	1.62891	0.0065	0.0201641	yes
SPATA24	SPATA24	SPATA24	chr5:139396766-139404087	WT	KO1	OK	2.85409	4.48828	0.65313	1.61766	0.0065	0.0201641	yes
EEF1AKMT1	EEF1AKMT1	EEF1AKMT1	chr13:20728930-20773958	WT	KO1	OK	3.34395	5.01754	0.585428	1.55192	0.0065	0.0201641	yes
FLI1	FLI1	FLI1	chr11:128681239-128813267	WT	KO1	OK	0.013132	1.70993	7.02471	2.17071	0.00675	0.0207912	yes
ANGPTL6	ANGPTL6	ANGPTL6	chr19:10086118-10102749	WT	KO1	OK	9.74126	16.6102	0.769886	1.55788	0.0068	0.0209174	yes
EPM2A	EPM2A	EPM2A	chr6:145625303-145964097	WT	KO1	OK	1.03219	2.52402	1.29002	1.7658	0.00685	0.0210433	yes
LINC01232	LINC01232	LINC01232	chr13:99486961-99499306	WT	KO1	OK	0.227983	0.504488	1.14589	1.72612	0.0069	0.0211828	yes
LEAP2	LEAP2	LEAP2	chr5:132873665-132874890	WT	KO1	OK	0.701482	1.59315	1.1834	1.73929	0.00695	0.0213175	yes
LOC103091866	LOC103091866	LOC103091866	chr1:145168404-145216071	WT	KO1	OK	0.200315	0.577427	1.52737	1.44711	0.007	0.0214472	yes
HSD11B1	HSD11B1	HSD11B1	chr1:209661358-209742562	WT	KO1	OK	0.184377	0.773001	2.06781	1.39179	0.00705	0.0215767	yes
RNASE1	RNASE1	RNASE1	chr14:20801355-20802877	WT	KO1	OK	0.370263	0.987148	1.41472	1.46371	0.00715	0.0218491	yes
LOC729224	LOC729224	LOC729224	chr2:202073252-202205201	WT	KO1	OK	0.0593437	2.43934	5.36125	2.98637	0.0072	0.0219874	yes
BMI1	BMI1	BMI1	chr10:22316382-22331485	WT	KO1	OK	0.578404	2.36149	2.02955	1.68644	0.00725	0.0221109	yes
TMEM88	TMEM88	TMEM88	chr17:7855065-7856099	WT	KO1	OK	1.5707	2.91797	0.893551	1.68174	0.00725	0.0221109	yes
ZNF284	ZNF284	ZNF284	chr19:44072143-44087470	WT	KO1	OK	0.316292	0.581644	0.878879	1.66555	0.0079	0.0238423	yes
BCL2L14	BCL2L14	BCL2L14	chr12:12070943-12099693	WT	KO1	OK	0.355954	0.654136	0.877901	1.53827	0.0079	0.0238423	yes
TMEM86A	TMEM86A	TMEM86A	chr11:18698734-18726230	WT	KO1	OK	0.441444	0.672241	0.606747	1.54117	0.0079	0.0238423	yes
LINC01502	LINC01502	LINC01502	chr9:135574924-135587112	WT	KO1	OK	0.324561	0.558208	0.782312	1.49125	0.0083	0.0248982	yes
ARHGEF26-AS1	ARHGEF26-AS1	ARHGEF26-AS1	chr3:154024400-154257827	WT	KO1	OK	0.587846	0.904918	0.622349	1.55313	0.0083	0.0248982	yes
LINC00278	LINC00278	LINC00278	chrY:3002995-3102272	WT	KO1	OK	0.347308	2.46844	2.82931	2.2417	0.00875	0.0260794	yes
NAV1	NAV1	NAV1	chr1:201648321-201884294	WT	KO1	OK	2.79635	4.67093	0.740166	1.50178	0.00895	0.0265843	yes
ZSCAN30	ZSCAN30	ZSCAN30	chr18:35241029-35290245	WT	KO1	OK	0.729239	1.24922	0.776568	1.52884	0.009	0.0266872	yes
PKD1P6-NPIPP1	PKD1P6-NPIPP1	PKD1P6-NPIPP1	chr16_KI270853v1_alt:284550-791405	WT	KO1	OK	0.897561	1.35434	0.593507	1.55091	0.00905	0.0267955	yes
BCL2	BCL2	BCL2	chr18:63123345-63319380	WT	KO1	OK	0.16205	0.540661	1.73828	1.68521	0.0091	0.0269091	yes
HIF1A-AS2	HIF1A-AS2	HIF1A-AS2	chr14:61681040-61749089	WT	KO1	OK	28.0416	56.3733	1.00744	1.51096	0.00925	0.0272831	yes
RBMXL1	RBMXL1	RBMXL1	chr1:88935772-88992960	WT	KO1	OK	2.50452	3.81088	0.60559	1.49383	0.00945	0.0277846	yes
SLC26A9	SLC26A9	SLC26A9	chr1:205913047-206003466	WT	KO1	OK	0.422331	0.694798	0.71822	1.48734	0.0095	0.0279021	yes
ISLR	ISLR	ISLR	chr15:74173745-74176871	WT	KO1	OK	0.460364	0.741246	0.687177	1.47258	0.00985	0.0287781	yes
ZBED3	ZBED3	ZBED3	chr5:77076706-77148351	WT	KO1	OK	0.788502	1.40058	0.828834	1.59093	0.01	0.029149	yes
SAP25	SAP25	SAP25	chr7:100572229-100573647	WT	KO1	OK	0.972482	1.72104	0.823541	1.5109	0.0103	0.0299106	yes
FPR1	FPR1	FPR1	chr19:51745769-51751897	WT	KO1	OK	0.0870362	0.520887	2.58128	1.93376	0.01055	0.0305156	yes
GPR157	GPR157	GPR157	chr1:9104416-9129170	WT	KO1	OK	0.665324	1.18316	0.830509	1.55952	0.01085	0.0312468	yes
NNT-AS1	NNT-AS1	NNT-AS1	chr5:43573184-43705566	WT	KO1	OK	0.669712	1.73816	1.37595	1.57823	0.0109	0.0313843	yes
HNRNPA1P33	HNRNPA1P33	HNRNPA1P33	chr10:46398361-46453306	WT	KO1	OK	21.3807	34.9295	0.708135	1.53429	0.01095	0.0315022	yes
AMT	AMT	AMT	chr3:49416777-49429324	WT	KO1	OK	1.15295	2.21331	0.940879	1.44752	0.01145	0.0327308	yes
TCF21	TCF21	TCF21	chr6:133889120-133895537	WT	KO1	OK	0.439783	0.79109	0.847049	1.48381	0.0116	0.0330983	yes
LINC00240	LINC00240	LINC00240	chr6:26956992-27023974	WT	KO1	OK	0.395459	0.968682	1.2925	1.66938	0.012	0.0340649	yes
ZNF596	ZNF596	ZNF596	chr8:208344-247340	WT	KO1	OK	0.298123	0.725615	1.2833	1.36553	0.01205	0.0341999	yes
LOC100129534	LOC100129534	LOC100129534	chr1:2321252-2391751	WT	KO1	OK	0.515682	0.964201	0.902853	1.49096	0.0121	0.0343348	yes
RAB7B	RAB7B	RAB7B	chr1:205913047-206003466	WT	KO1	OK	0.321735	0.665253	1.04803	1.46657	0.01215	0.0344696	yes
WNT4	WNT4	WNT4	chr1:22117304-22143026	WT	KO1	OK	0.360888	0.545508	0.596049	1.4786	0.0123	0.0348454	yes
SENP8	SENP8	SENP8	chr15:71826019-72140970	WT	KO1	OK	1.32191	3.23803	1.29249	1.42402	0.01235	0.0349728	yes
HESX1	HESX1	HESX1	chr3:57197915-57200252	WT	KO1	OK	0.249339	0.727664	1.54516	1.99312	0.01255	0.0354453	yes
LOC101928767	LOC101928767	LOC101928767	chr14:85934677-86129777	WT	KO1	OK	0.211822	1.18324	2.48182	2.14894	0.0126	0.0355432	yes
EN2	EN2	EN2	chr7:155458128-155464831	WT	KO1	OK	0.400012	0.610956	0.611025	1.49469	0.01285	0.0361385	yes
HSD17B6	HSD17B6	HSD17B6	chr12:56763217-56787790	WT	KO1	OK	0.24001	0.551242	1.19959	1.76033	0.01345	0.037545	yes
SCAMP1-AS1	SCAMP1-AS1	SCAMP1-AS1	chr5:78358763-78480739	WT	KO1	OK	7.30122	14.0653	0.945931	1.49074	0.01375	0.0382596	yes
PCDHGA7	PCDHGA7	PCDHGA7	chr5:141330684-141512981	WT	KO1	OK	0.35608	1.05469	1.56655	1.54471	0.0138	0.0383833	yes
SNHG24	SNHG24	SNHG24	chr14:100967651-100986650	WT	KO1	OK	0.122203	0.593	2.27876	1.69967	0.01395	0.0387076	yes
LYRM5	LYRM5	LYRM5	chr12:25195215-25250931	WT	KO1	OK	4.08442	8.96859	1.13475	1.51966	0.01395	0.0387076	yes
SNORD114-10	SNORD114-10	SNORD114-10	chr14:100967051-100967122	WT	KO1	OK	0	210.809	inf	-nan	0.0144	0.0397895	yes
MIRLET7I	MIRLET7I	MIRLET7I	chr12:62603685-62603769	WT	KO1	OK	0	81.1701	inf	-nan	0.0144	0.0397896	yes
LOC100289230	LOC100289230	LOC100289230	chr5:98929133-98931009	WT	KO1	OK	0.437433	0.726776	0.732447	1.45287	0.01465	0.0404081	yes
REP15	REP15	REP15	chr12:27696494-27697633	WT	KO1	OK	0.619366	1.07379	0.79384	1.41691	0.0148	0.0407491	yes
NRL	NRL	NRL	chr14:24080106-24084623	WT	KO1	OK	0.500885	0.80365	0.682087	1.44349	0.01495	0.0411295	yes
FMO4	FMO4	FMO4	chr1:171314182-171342084	WT	KO1	OK	0.51478	0.815627	0.663953	1.435	0.0151	0.0415011	yes
ANGPTL1	ANGPTL1	ANGPTL1	chr1:178725146-178921842	WT	KO1	OK	0.213224	1.1684	2.45409	1.82319	0.0153	0.0419265	yes
MBD5	MBD5	MBD5	chr2:147844516-148513475	WT	KO1	OK	1.26756	2.46388	0.958874	1.44432	0.0153	0.0419265	yes
CRTAC1	CRTAC1	CRTAC1	chr10:97850237-98030828	WT	KO1	OK	0.894028	2.10973	1.23866	1.58336	0.01565	0.0427089	yes
TBCK	TBCK	TBCK	chr4:106044316-106349224	WT	KO1	OK	1.40039	2.67503	0.933719	1.45208	0.01575	0.0429228	yes
CYP2U1	CYP2U1	CYP2U1	chr4:107824564-107953457	WT	KO1	OK	0.454367	1.24279	1.45165	1.64709	0.0164	0.0443984	yes
MASP2	MASP2	MASP2	chr1:11026522-11047239	WT	KO1	OK	0.29492	0.509989	0.790143	1.21656	0.01665	0.0449877	yes
KIAA0895L	KIAA0895L	KIAA0895L	chr16:67170496-67183980	WT	KO1	OK	4.03094	6.13074	0.604946	1.35668	0.01725	0.0464015	yes
LINC01024	LINC01024	LINC01024	chr5:140102921-140108012	WT	KO1	OK	0.414833	0.671076	0.693944	1.29065	0.0175	0.046974	yes
IL4I1	IL4I1	IL4I1	chr19:49889655-49933936	WT	KO1	OK	10.302	22.3159	1.11515	1.40756	0.0177	0.0474651	yes
LOC284080	LOC284080	LOC284080	chr17:50050348-50055739	WT	KO1	OK	0.361055	0.580245	0.684441	1.43282	0.0177	0.0474651	yes
STXBP5-AS1	STXBP5-AS1	STXBP5-AS1	chr6:146841388-147390476	WT	KO1	OK	0.309817	1.44753	2.2241	1.71777	0.018	0.0481581	yes
CHRNA9	CHRNA9	CHRNA9	chr4:40335328-40355217	WT	KO1	OK	0.321767	0.532171	0.725873	1.37009	0.0183	0.048848	yes
F8	F8	F8	chrX:154835788-155022723	WT	KO1	OK	1.62053	2.65642	0.713015	1.36074	0.01845	0.0491352	yes

## Sheet: KO2 VS parental UP
test_id	gene_id	gene	locus	sample_1	sample_2	status	value_1	value_2	log2(fold_change)	test_stat	p_value	q_value	significant
POP3	POP3	POP3	chr1:158999970-159000312	WT	KO2	OK	0	1.08808	inf	-nan	5e-05	0.000490444	yes
RNA5S9	RNA5S9	RNA5S9	chr1:228628145-228628266	WT	KO2	OK	0	12.142	inf	-nan	0.00145	0.00929343	yes
SPARC	SPARC	SPARC	chr5:151661095-151687907	WT	KO2	OK	0.459112	84.3031	7.5206	20.6398	5e-05	0.000490444	yes
TRIB2	TRIB2	TRIB2	chr2:12716871-12742732	WT	KO2	OK	0.153001	9.63744	5.97703	11.7421	5e-05	0.000490444	yes
EDIL3	EDIL3	EDIL3	chr5:83940594-84384867	WT	KO2	OK	0.0460699	2.74371	5.89616	6.31994	5e-05	0.000490444	yes
CPVL	CPVL	CPVL	chr7:28979966-29146537	WT	KO2	OK	0.26627	14.1954	5.73639	9.68015	5e-05	0.000490444	yes
CDK14	CDK14	CDK14	chr7:90596361-91210590	WT	KO2	OK	0.0273743	0.860956	4.97504	3.62094	5e-05	0.000490444	yes
TLR4	TLR4	TLR4	chr9:117704174-117717491	WT	KO2	OK	0.0270932	0.69126	4.67323	4.18391	5e-05	0.000490444	yes
PXDN	PXDN	PXDN	chr2:1631886-1744547	WT	KO2	OK	0.333395	7.84197	4.55591	14.385	5e-05	0.000490444	yes
PIP	PIP	PIP	chr7:143132080-143139741	WT	KO2	OK	0.76783	17.4129	4.50322	6.56089	5e-05	0.000490444	yes
WNT5A	WNT5A	WNT5A	chr3:55465714-55487642	WT	KO2	OK	0.0650161	1.26608	4.28342	6.69209	5e-05	0.000490444	yes
SPON2	SPON2	SPON2	chr4:1166932-1208962	WT	KO2	OK	0.432629	8.07892	4.22296	5.95521	5e-05	0.000490444	yes
ADAM28	ADAM28	ADAM28	chr8:24294039-24548618	WT	KO2	OK	0.0418253	0.730616	4.12667	2.46023	5e-05	0.000490444	yes
IL33	IL33	IL33	chr9:6215148-6257983	WT	KO2	OK	0.0444955	0.767624	4.10867	1.97692	0.0002	0.00168549	yes
LINC01085	LINC01085	LINC01085	chr4:14111967-14140052	WT	KO2	OK	0.0804264	1.37528	4.09592	4.50862	0.0026	0.0153634	yes
PTPRE	PTPRE	PTPRE	chr10:127907060-128085855	WT	KO2	OK	0.462872	6.62007	3.83816	9.65978	5e-05	0.000490444	yes
EFEMP1	EFEMP1	EFEMP1	chr2:55865961-55924163	WT	KO2	OK	1.04832	14.5881	3.79865	12.4155	5e-05	0.000490444	yes
CDH5	CDH5	CDH5	chr16:66366606-66404786	WT	KO2	OK	0.0404186	0.552765	3.77358	3.75514	0.0005	0.00374194	yes
FAM198B	FAM198B	FAM198B	chr4:158124579-158173050	WT	KO2	OK	0.154421	1.94512	3.65492	7.73276	5e-05	0.000490444	yes
NR1H4	NR1H4	NR1H4	chr12:100473772-100563867	WT	KO2	OK	0.246223	2.88559	3.55083	5.09444	5e-05	0.000490444	yes
EHF	EHF	EHF	chr11:34621040-34663287	WT	KO2	OK	2.11309	22.7791	3.43028	13.1664	5e-05	0.000490444	yes
CDH19	CDH19	CDH19	chr18:66501186-66604138	WT	KO2	OK	0.0720679	0.722926	3.32642	4.73549	5e-05	0.000490444	yes
LINC01133	LINC01133	LINC01133	chr1:159961223-159979086	WT	KO2	OK	0.170992	1.7033	3.31633	3.2744	0.0009	0.00618801	yes
C4BPA	C4BPA	C4BPA	chr1:207104261-207144972	WT	KO2	OK	0.549249	5.46693	3.3152	8.37569	5e-05	0.000490444	yes
PLEKHS1	PLEKHS1	PLEKHS1	chr10:113751453-113782433	WT	KO2	OK	0.343102	3.25502	3.24595	6.70958	5e-05	0.000490444	yes
TNFSF14	TNFSF14	TNFSF14	chr19:6661252-6670588	WT	KO2	OK	0.35405	3.13065	3.14444	8.56392	5e-05	0.000490444	yes
VTCN1	VTCN1	VTCN1	chr1:117143586-117210960	WT	KO2	OK	0.161626	1.40644	3.12131	3.69479	5e-05	0.000490444	yes
SOX2	SOX2	SOX2	chr3:181056679-181742225	WT	KO2	OK	0.528964	4.5175	3.09428	7.63072	5e-05	0.000490444	yes
KIAA0040	KIAA0040	KIAA0040	chr1:175156986-175193093	WT	KO2	OK	0.969147	8.11328	3.0655	10.6158	5e-05	0.000490444	yes
LCN2	LCN2	LCN2	chr9:128149429-128153455	WT	KO2	OK	24.9137	197.976	2.99031	12.1929	5e-05	0.000490444	yes
KLRC2	KLRC2	KLRC2	chr12:10430605-10435993	WT	KO2	OK	0.909134	6.78232	2.89921	6.79932	5e-05	0.000490444	yes
PALMD	PALMD	PALMD	chr1:99516983-99765793	WT	KO2	OK	0.477331	3.55985	2.89875	5.19737	5e-05	0.000490444	yes
FAM110B	FAM110B	FAM110B	chr8:57994553-58149718	WT	KO2	OK	0.151131	1.1018	2.86599	5.82529	5e-05	0.000490444	yes
CCL17	CCL17	CCL17	chr16:57404766-57416062	WT	KO2	OK	6.5615	47.3684	2.85183	8.47256	5e-05	0.000490444	yes
PLCXD3	PLCXD3	PLCXD3	chr5:41306945-41510628	WT	KO2	OK	0.291825	2.09948	2.84686	8.60334	5e-05	0.000490444	yes
IL7R	IL7R	IL7R	chr5:35856874-35879603	WT	KO2	OK	0.260919	1.85113	2.82673	6.72021	5e-05	0.000490444	yes
DNAJC15	DNAJC15	DNAJC15	chr13:43023225-43109170	WT	KO2	OK	0.736097	5.22031	2.82617	8.41979	5e-05	0.000490444	yes
GLIPR1	GLIPR1	GLIPR1	chr12:75480732-75511638	WT	KO2	OK	4.05108	28.323	2.80559	6.78309	5e-05	0.000490444	yes
CFI	CFI	CFI	chr4:109740691-109802225	WT	KO2	OK	0.864439	6.00826	2.79711	8.05745	5e-05	0.000490444	yes
CRISPLD1	CRISPLD1	CRISPLD1	chr8:74984472-75034561	WT	KO2	OK	0.308405	2.1433	2.79694	7.23274	5e-05	0.000490444	yes
KCNJ2	KCNJ2	KCNJ2	chr17:70169534-70180042	WT	KO2	OK	0.491094	3.40234	2.79245	8.50653	5e-05	0.000490444	yes
TSPAN1	TSPAN1	TSPAN1	chr1:46040139-46185962	WT	KO2	OK	2.00592	13.8282	2.78528	5.34439	5e-05	0.000490444	yes
NOS1AP	NOS1AP	NOS1AP	chr1:162069790-162370023	WT	KO2	OK	0.0799913	0.549581	2.78042	4.13458	5e-05	0.000490444	yes
GRAMD3	GRAMD3	GRAMD3	chr5:126360095-126494161	WT	KO2	OK	1.02522	7.01806	2.77514	8.54236	5e-05	0.000490444	yes
PARP8	PARP8	PARP8	chr5:50665898-50846522	WT	KO2	OK	0.330112	2.19659	2.73424	8.39144	5e-05	0.000490444	yes
BMPER	BMPER	BMPER	chr7:33904910-34155872	WT	KO2	OK	0.259993	1.69326	2.70326	7.09754	5e-05	0.000490444	yes
HDAC9	HDAC9	HDAC9	chr7:18086941-19002414	WT	KO2	OK	0.268189	1.72774	2.68756	3.93698	5e-05	0.000490444	yes
TCN1	TCN1	TCN1	chr11:59852807-59866568	WT	KO2	OK	2.4895	15.9395	2.67867	8.85471	5e-05	0.000490444	yes
DPYSL3	DPYSL3	DPYSL3	chr5:147390807-147510056	WT	KO2	OK	4.74479	30.3719	2.67832	11.2073	5e-05	0.000490444	yes
LHX9	LHX9	LHX9	chr1:197912504-197930143	WT	KO2	OK	0.0872214	0.555323	2.67057	2.36831	0.00075	0.00527851	yes
COL4A6	COL4A6	COL4A6	chrX:108155606-108439497	WT	KO2	OK	5.37357	33.855	2.65542	11.213	5e-05	0.000490444	yes
LINC00993	LINC00993	LINC00993	chr10:37309185-37347028	WT	KO2	OK	0.6777	4.2225	2.63938	3.89899	5e-05	0.000490444	yes
PDZK1IP1	PDZK1IP1	PDZK1IP1	chr1:47183588-47190099	WT	KO2	OK	12.8957	79.7006	2.6277	10.0953	5e-05	0.000490444	yes
LOC645553	LOC645553	LOC645553	chr19:46189028-46203062	WT	KO2	OK	38.663	238.895	2.62735	11.3557	5e-05	0.000490444	yes
OLR1	OLR1	OLR1	chr12:10158299-10191804	WT	KO2	OK	6.4181	38.178	2.57252	10.0581	5e-05	0.000490444	yes
SH2D1B	SH2D1B	SH2D1B	chr1:162395265-162412138	WT	KO2	OK	0.176413	1.0389	2.55802	4.39912	5e-05	0.000490444	yes
KCNS3	KCNS3	KCNS3	chr2:17877846-17932958	WT	KO2	OK	1.04908	6.14251	2.54971	7.78865	5e-05	0.000490444	yes
TCF4	TCF4	TCF4	chr18:55222330-55635993	WT	KO2	OK	0.783293	4.57597	2.54646	9.0386	5e-05	0.000490444	yes
UG0898H09	UG0898H09	UG0898H09	chr8:62248941-62999652	WT	KO2	OK	0.123485	0.715106	2.53383	5.58812	5e-05	0.000490444	yes
LINC01139	LINC01139	LINC01139	chr1:238480383-238486017	WT	KO2	OK	0.361191	2.02476	2.48692	4.49838	5e-05	0.000490444	yes
LINC01272	LINC01272	LINC01272	chr20:50267485-50279795	WT	KO2	OK	0.104803	0.586571	2.48463	2.86326	0.0034	0.0192601	yes
FBN2	FBN2	FBN2	chr5:128257908-128538042	WT	KO2	OK	1.71446	9.43835	2.46078	10.0358	5e-05	0.000490444	yes
CCL28	CCL28	CCL28	chr5:43376645-43412391	WT	KO2	OK	0.555205	3.04793	2.45674	3.06202	5e-05	0.000490444	yes
PTPRB	PTPRB	PTPRB	chr12:70516850-70637440	WT	KO2	OK	0.0998555	0.545922	2.45078	5.39304	5e-05	0.000490444	yes
NPBWR1	NPBWR1	NPBWR1	chr8:52939907-52940894	WT	KO2	OK	0.289507	1.58042	2.44864	3.06492	0.00105	0.00705301	yes
ST6GALNAC1	ST6GALNAC1	ST6GALNAC1	chr17:76624755-76643838	WT	KO2	OK	0.102256	0.556762	2.44487	2.27773	0.0001	0.000919048	yes
TRPC6	TRPC6	TRPC6	chr11:101451563-101583928	WT	KO2	OK	0.108007	0.577053	2.41758	4.33493	5e-05	0.000490444	yes
LOC730338	LOC730338	LOC730338	chr7:46687878-46697122	WT	KO2	OK	0.109225	0.576646	2.40038	2.79752	0.0041	0.0224729	yes
C3	C3	C3	chr19:6677834-6720682	WT	KO2	OK	30.2269	159.434	2.39905	10.2817	5e-05	0.000490444	yes
SAA2	SAA2	SAA2	chr11:18231354-18248674	WT	KO2	OK	0.450974	2.33904	2.3748	2.57638	0.0001	0.000919048	yes
FAM189A2	FAM189A2	FAM189A2	chr9:69324571-69392454	WT	KO2	OK	0.143352	0.742382	2.3726	3.19069	0.00015	0.0013092	yes
PLEKHG7	PLEKHG7	PLEKHG7	chr12:92736488-92772092	WT	KO2	OK	0.146142	0.756824	2.37259	4.13704	5e-05	0.000490444	yes
TXNIP	TXNIP	TXNIP	chr1:145992425-145996631	WT	KO2	OK	0.98553	5.01218	2.34647	7.17339	5e-05	0.000490444	yes
TOX3	TOX3	TOX3	chr16:52436415-52547802	WT	KO2	OK	0.319247	1.61974	2.34301	6.07423	5e-05	0.000490444	yes
TNFSF15	TNFSF15	TNFSF15	chr9:114784634-114806128	WT	KO2	OK	3.65829	18.298	2.32245	9.5325	5e-05	0.000490444	yes
VNN2	VNN2	VNN2	chr6:132743869-132763459	WT	KO2	OK	0.174132	0.858223	2.30117	2.0142	5e-05	0.000490444	yes
CHN2	CHN2	CHN2	chr7:29146546-29514335	WT	KO2	OK	0.557828	2.72779	2.28984	5.25696	5e-05	0.000490444	yes
PRSS22	PRSS22	PRSS22	chr16:2852726-2858170	WT	KO2	OK	0.403991	1.94109	2.26447	4.0561	5e-05	0.000490444	yes
SDK1	SDK1	SDK1	chr7:3301447-4268999	WT	KO2	OK	0.420161	2.00452	2.25424	6.99147	5e-05	0.000490444	yes
LSAMP	LSAMP	LSAMP	chr3:115802362-116445538	WT	KO2	OK	0.143956	0.677932	2.23551	5.19287	5e-05	0.000490444	yes
C1orf226	C1orf226	C1orf226	chr1:162378905-162386818	WT	KO2	OK	0.938342	4.39847	2.22882	6.3767	5e-05	0.000490444	yes
CDH6	CDH6	CDH6	chr5:31193654-31329146	WT	KO2	OK	0.299742	1.39298	2.21638	6.77579	5e-05	0.000490444	yes
TMEM47	TMEM47	TMEM47	chrX:34627063-34657288	WT	KO2	OK	1.02289	4.72578	2.2079	7.18586	5e-05	0.000490444	yes
COL4A5	COL4A5	COL4A5	chrX:108439843-108697545	WT	KO2	OK	6.66777	30.6865	2.20233	9.45273	5e-05	0.000490444	yes
ZG16B	ZG16B	ZG16B	chr16:2830171-2832284	WT	KO2	OK	0.406998	1.84082	2.17726	2.72148	0.00045	0.00342385	yes
RFTN1	RFTN1	RFTN1	chr3:16315844-16513715	WT	KO2	OK	4.09415	18.4977	2.17571	8.55158	5e-05	0.000490444	yes
MYZAP	MYZAP	MYZAP	chr15:57591903-57717557	WT	KO2	OK	1.47057	6.63716	2.17419	2.59786	0.0004	0.00310726	yes
GMPR	GMPR	GMPR	chr6:16238579-16295549	WT	KO2	OK	2.77299	12.4183	2.16295	7.08434	5e-05	0.000490444	yes
PLA1A	PLA1A	PLA1A	chr3:119597847-119629811	WT	KO2	OK	6.49811	29.0158	2.15875	7.92662	5e-05	0.000490444	yes
WFDC21P	WFDC21P	WFDC21P	chr17:60079308-60088692	WT	KO2	OK	1.13826	5.0744	2.15641	3.81142	5e-05	0.000490444	yes
FGFBP1	FGFBP1	FGFBP1	chr4:15935569-15938740	WT	KO2	OK	5.74318	25.5368	2.15265	7.85656	5e-05	0.000490444	yes
CEACAM6	CEACAM6	CEACAM6	chr19:41755519-41772208	WT	KO2	OK	23.7565	105.58	2.15194	9.03043	5e-05	0.000490444	yes
KCNJ16	KCNJ16	KCNJ16	chr17:70075224-70135605	WT	KO2	OK	0.328807	1.4591	2.14977	4.95848	5e-05	0.000490444	yes
ACE2	ACE2	ACE2	chrX:15561032-15602069	WT	KO2	OK	0.38195	1.69241	2.14762	5.49674	5e-05	0.000490444	yes
SLC39A8	SLC39A8	SLC39A8	chr4:102251040-102345498	WT	KO2	OK	14.078	61.9741	2.13823	8.76005	5e-05	0.000490444	yes
IRX2	IRX2	IRX2	chr5:2746164-2751655	WT	KO2	OK	0.181779	0.793978	2.12691	3.60635	5e-05	0.000490444	yes
FHOD3	FHOD3	FHOD3	chr18:36297695-37232127	WT	KO2	OK	1.29639	5.65193	2.12425	3.15437	5e-05	0.000490444	yes
DEGS2	DEGS2	DEGS2	chr14:100146415-100159675	WT	KO2	OK	0.607936	2.60637	2.10005	4.43064	5e-05	0.000490444	yes
EPHA4	EPHA4	EPHA4	chr2:221418026-221574202	WT	KO2	OK	0.501068	2.14733	2.09946	6.76071	5e-05	0.000490444	yes
SLC9A9	SLC9A9	SLC9A9	chr3:143265221-143848531	WT	KO2	OK	0.176346	0.755162	2.09838	4.12386	5e-05	0.000490444	yes
SIDT1	SIDT1	SIDT1	chr3:113532370-113629575	WT	KO2	OK	0.568013	2.42725	2.09533	6.20898	5e-05	0.000490444	yes
OTOF	OTOF	OTOF	chr2:26457202-26558698	WT	KO2	OK	0.15016	0.64123	2.09434	3.99278	5e-05	0.000490444	yes
NOX1	NOX1	NOX1	chrX:100843323-100874345	WT	KO2	OK	0.701675	2.9886	2.09059	5.51004	5e-05	0.000490444	yes
LGR6	LGR6	LGR6	chr1:202193989-202319761	WT	KO2	OK	7.28122	30.9902	2.08956	8.54872	5e-05	0.000490444	yes
ATRNL1	ATRNL1	ATRNL1	chr10:115093364-115948998	WT	KO2	OK	0.124555	0.529614	2.08816	1.82973	0.00145	0.00929343	yes
GJB4	GJB4	GJB4	chr1:34759740-34763724	WT	KO2	OK	0.314694	1.32794	2.07717	4.58697	5e-05	0.000490444	yes
ACSL5	ACSL5	ACSL5	chr10:112374157-112428380	WT	KO2	OK	1.89065	7.96234	2.07431	7.40776	5e-05	0.000490444	yes
PPP1R14D	PPP1R14D	PPP1R14D	chr15:40815444-40828709	WT	KO2	OK	1.12841	4.7333	2.06856	4.24812	5e-05	0.000490444	yes
TNFSF10	TNFSF10	TNFSF10	chr3:172505507-172523507	WT	KO2	OK	44.1066	184.986	2.06835	8.86341	5e-05	0.000490444	yes
PRKY	PRKY	PRKY	chrY:7273971-7381547	WT	KO2	OK	0.60083	2.51269	2.06421	6.92401	5e-05	0.000490444	yes
SLC25A29	SLC25A29	SLC25A29	chr14:100291110-100306547	WT	KO2	OK	8.22292	34.2431	2.05809	8.24061	5e-05	0.000490444	yes
DIO3OS	DIO3OS	DIO3OS	chr14:101552222-101555676	WT	KO2	OK	0.170995	0.711721	2.05736	3.88352	5e-05	0.000490444	yes
ZBP1	ZBP1	ZBP1	chr20:57603845-57620576	WT	KO2	OK	1.08553	4.44615	2.03416	4.81339	5e-05	0.000490444	yes
COL11A1	COL11A1	COL11A1	chr1:102876466-103108496	WT	KO2	OK	0.910889	3.72546	2.03207	7.34387	5e-05	0.000490444	yes
TNRC6C-AS1	TNRC6C-AS1	TNRC6C-AS1	chr17:78004236-78111799	WT	KO2	OK	0.537342	2.19508	2.03036	3.5186	5e-05	0.000490444	yes
RNF125	RNF125	RNF125	chr18:32018481-32073191	WT	KO2	OK	0.231064	0.93165	2.0115	5.18491	5e-05	0.000490444	yes
ABI3BP	ABI3BP	ABI3BP	chr3:100749334-100993490	WT	KO2	OK	0.138099	0.555607	2.00837	3.95942	5e-05	0.000490444	yes
MUC5B	MUC5B	MUC5B	chr11:1223064-1262176	WT	KO2	OK	6.81773	27.3326	2.00326	8.6679	5e-05	0.000490444	yes
LOC102724908	LOC102724908	LOC102724908	chr19:28435388-28727694	WT	KO2	OK	1.58381	6.34745	2.00278	7.11986	5e-05	0.000490444	yes
CDH2	CDH2	CDH2	chr18:27950962-28177446	WT	KO2	OK	3.62897	14.4708	1.99552	7.91711	5e-05	0.000490444	yes
FAM110C	FAM110C	FAM110C	chr2:38813-46588	WT	KO2	OK	0.350712	1.38851	1.98518	5.08975	5e-05	0.000490444	yes
ADRB2	ADRB2	ADRB2	chr5:148826592-148828634	WT	KO2	OK	0.293819	1.16043	1.98166	3.76457	5e-05	0.000490444	yes
CSF2RA	CSF2RA	CSF2RA	chrY:1268799-1309935	WT	KO2	OK	8.94716	35.282	1.97943	7.77522	5e-05	0.000490444	yes
CCAT1	CCAT1	CCAT1	chr8:127207381-127219268	WT	KO2	OK	1.05723	4.16849	1.97923	6.1765	5e-05	0.000490444	yes
PDCD1LG2	PDCD1LG2	PDCD1LG2	chr9:5510544-5571282	WT	KO2	OK	0.344938	1.35391	1.97272	4.23057	5e-05	0.000490444	yes
NREP	NREP	NREP	chr5:111496034-112017306	WT	KO2	OK	6.15948	24.1387	1.97047	2.75956	5e-05	0.000490444	yes
SLC27A2	SLC27A2	SLC27A2	chr15:50182195-50236392	WT	KO2	OK	17.2278	67.4777	1.96968	8.40204	5e-05	0.000490444	yes
GDA	GDA	GDA	chr9:72114594-72252224	WT	KO2	OK	1.11886	4.30342	1.94345	4.85352	5e-05	0.000490444	yes
KITLG	KITLG	KITLG	chr12:88492792-88580473	WT	KO2	OK	2.0122	7.69988	1.93606	7.30161	5e-05	0.000490444	yes
TP63	TP63	TP63	chr3:189631426-189897279	WT	KO2	OK	1.18244	4.51806	1.93394	6.65777	5e-05	0.000490444	yes
BCL2L15	BCL2L15	BCL2L15	chr1:113812611-113914086	WT	KO2	OK	1.6247	6.17936	1.92728	3.93752	5e-05	0.000490444	yes
CXCL5	CXCL5	CXCL5	chr4:73995641-73998729	WT	KO2	OK	78.1487	296.944	1.9259	8.00184	5e-05	0.000490444	yes
C4BPB	C4BPB	C4BPB	chr1:207088841-207099992	WT	KO2	OK	0.821129	3.10417	1.91853	2.99096	5e-05	0.000490444	yes
LINC01559	LINC01559	LINC01559	chr12:13370670-13376745	WT	KO2	OK	0.316929	1.19656	1.91665	4.38857	5e-05	0.000490444	yes
DNM3	DNM3	DNM3	chr1:171841477-172412717	WT	KO2	OK	0.734021	2.75674	1.90907	4.38048	5e-05	0.000490444	yes
KLRC3	KLRC3	KLRC3	chr12:10412314-10420595	WT	KO2	OK	0.698827	2.62222	1.90778	3.51299	5e-05	0.000490444	yes
CASC15	CASC15	CASC15	chr6:21666443-22194387	WT	KO2	OK	1.21115	4.53095	1.90344	5.59407	5e-05	0.000490444	yes
CLEC2B	CLEC2B	CLEC2B	chr12:9852368-9869859	WT	KO2	OK	3.6332	13.5064	1.89434	6.80891	5e-05	0.000490444	yes
STK33	STK33	STK33	chr11:8391865-8594289	WT	KO2	OK	0.264309	0.982489	1.89422	3.17964	5e-05	0.000490444	yes
MAL2	MAL2	MAL2	chr8:119208370-119245673	WT	KO2	OK	0.329021	1.21769	1.8879	4.18606	5e-05	0.000490444	yes
GBP1	GBP1	GBP1	chr1:89052303-89065360	WT	KO2	OK	23.3422	86.1915	1.88461	8.24707	5e-05	0.000490444	yes
STS	STS	STS	chrX:7048919-7354643	WT	KO2	OK	3.72619	13.7126	1.87972	5.27216	5e-05	0.000490444	yes
NIPAL1	NIPAL1	NIPAL1	chr4:48016771-48040173	WT	KO2	OK	0.502215	1.84516	1.87737	5.68635	5e-05	0.000490444	yes
RARRES1	RARRES1	RARRES1	chr3:158697107-158732486	WT	KO2	OK	25.0636	91.4432	1.86728	7.6082	5e-05	0.000490444	yes
TNFSF13B	TNFSF13B	TNFSF13B	chr13:108269628-108308484	WT	KO2	OK	6.21094	22.6143	1.86435	7.38886	5e-05	0.000490444	yes
CARD11	CARD11	CARD11	chr7:2906075-3043945	WT	KO2	OK	1.16789	4.23649	1.85897	6.41049	5e-05	0.000490444	yes
KCNMB4	KCNMB4	KCNMB4	chr12:70366281-70434292	WT	KO2	OK	0.136562	0.493582	1.85373	3.68223	5e-05	0.000490444	yes
CLTCL1	CLTCL1	CLTCL1	chr22:19179473-19291716	WT	KO2	OK	1.51318	5.46037	1.85141	6.928	5e-05	0.000490444	yes
PTAFR	PTAFR	PTAFR	chr1:28147165-28193936	WT	KO2	OK	0.463193	1.67089	1.85094	5.13218	5e-05	0.000490444	yes
INPP4B	INPP4B	INPP4B	chr4:142028028-142846451	WT	KO2	OK	2.01468	7.12812	1.82297	6.77211	5e-05	0.000490444	yes
FRMD5	FRMD5	FRMD5	chr15:43870760-44195294	WT	KO2	OK	1.22859	4.32529	1.81579	6.14231	5e-05	0.000490444	yes
SALL1	SALL1	SALL1	chr16:50878772-51409868	WT	KO2	OK	0.367724	1.29294	1.81396	5.10947	5e-05	0.000490444	yes
MOB3B	MOB3B	MOB3B	chr9:27325208-27529852	WT	KO2	OK	0.486627	1.70658	1.81022	5.71922	5e-05	0.000490444	yes
ANKRD30A	ANKRD30A	ANKRD30A	chr10:37125856-37232567	WT	KO2	OK	0.359215	1.25532	1.80514	4.83939	5e-05	0.000490444	yes
NRN1	NRN1	NRN1	chr6:5997999-6007605	WT	KO2	OK	0.515821	1.79039	1.79533	3.51494	5e-05	0.000490444	yes
TNS4	TNS4	TNS4	chr17:40475827-40501602	WT	KO2	OK	14.7441	50.5652	1.778	7.71984	5e-05	0.000490444	yes
CCBE1	CCBE1	CCBE1	chr18:59430938-59697412	WT	KO2	OK	0.312653	1.07149	1.77698	5.0742	5e-05	0.000490444	yes
ITGB8	ITGB8	ITGB8	chr7:20328300-20415759	WT	KO2	OK	1.34009	4.53772	1.75964	6.69236	5e-05	0.000490444	yes
PAX7	PAX7	PAX7	chr1:18631005-18748866	WT	KO2	OK	1.08508	3.62655	1.7408	6.11111	5e-05	0.000490444	yes
TMEM229B	TMEM229B	TMEM229B	chr14:67470265-67515304	WT	KO2	OK	0.76618	2.55771	1.7391	5.40109	5e-05	0.000490444	yes
PTX3	PTX3	PTX3	chr3:157259742-157503626	WT	KO2	OK	0.490012	1.63214	1.73587	3.57284	5e-05	0.000490444	yes
ATP8B4	ATP8B4	ATP8B4	chr15:49858237-50119222	WT	KO2	OK	0.214037	0.709288	1.72851	3.89706	5e-05	0.000490444	yes
SGCD	SGCD	SGCD	chr5:156326756-156767787	WT	KO2	OK	2.4974	8.2497	1.72392	4.03818	5e-05	0.000490444	yes
FBN1	FBN1	FBN1	chr15:48408305-48645788	WT	KO2	OK	1.8123	5.88981	1.7004	6.97755	5e-05	0.000490444	yes
RNF144B	RNF144B	RNF144B	chr6:18387349-18468874	WT	KO2	OK	0.47677	1.54072	1.69224	5.05977	5e-05	0.000490444	yes
CPA4	CPA4	CPA4	chr7:130293133-130324180	WT	KO2	OK	0.405012	1.30585	1.68896	3.63415	5e-05	0.000490444	yes
C10orf11	C10orf11	C10orf11	chr10:75431645-76557376	WT	KO2	OK	4.268	13.7189	1.68453	5.11268	5e-05	0.000490444	yes
C17orf99	C17orf99	C17orf99	chr17:78146352-78166283	WT	KO2	OK	0.230493	0.738301	1.67949	1.82208	0.0062	0.0318674	yes
ANK1	ANK1	ANK1	chr8:41653224-41896762	WT	KO2	OK	0.815367	2.60706	1.6769	3.70215	5e-05	0.000490444	yes
CXXC4	CXXC4	CXXC4	chr4:104468305-104697592	WT	KO2	OK	0.195503	0.621111	1.66766	3.42106	5e-05	0.000490444	yes
IGFL4	IGFL4	IGFL4	chr19:46039747-46041016	WT	KO2	OK	0.776104	2.46519	1.66738	2.24517	0.004	0.0219952	yes
CXCL1	CXCL1	CXCL1	chr4:73869391-73871302	WT	KO2	OK	31.7251	100.083	1.6575	6.94294	5e-05	0.000490444	yes
CYSRT1	CYSRT1	CYSRT1	chr9:137224634-137226311	WT	KO2	OK	1.63223	5.14831	1.65726	4.62284	5e-05	0.000490444	yes
EPSTI1	EPSTI1	EPSTI1	chr13:42886387-42992271	WT	KO2	OK	3.94992	12.4093	1.65152	6.45926	5e-05	0.000490444	yes
IFI16	IFI16	IFI16	chr1:159009891-159055155	WT	KO2	OK	40.316	126.401	1.64858	7.25432	5e-05	0.000490444	yes
ITGB2	ITGB2	ITGB2	chr21:44885953-44929680	WT	KO2	OK	1.84981	5.7919	1.64666	4.9741	5e-05	0.000490444	yes
TMSB4Y	TMSB4Y	TMSB4Y	chrY:13703566-13706022	WT	KO2	OK	0.488972	1.52925	1.645	3.37268	5e-05	0.000490444	yes
GBP3	GBP3	GBP3	chr1:89006676-89022866	WT	KO2	OK	18.6291	57.4772	1.62543	6.92169	5e-05	0.000490444	yes
PDE8B	PDE8B	PDE8B	chr5:77210880-77428255	WT	KO2	OK	4.3678	13.453	1.62295	6.55708	5e-05	0.000490444	yes
TNC	TNC	TNC	chr9:115019575-115118257	WT	KO2	OK	0.658205	2.02681	1.6226	5.67008	5e-05	0.000490444	yes
LOC339539	LOC339539	LOC339539	chr1:42857621-42888792	WT	KO2	OK	0.205029	0.629788	1.61904	2.71716	0.0001	0.000919048	yes
ANGPT1	ANGPT1	ANGPT1	chr8:107249481-107498055	WT	KO2	OK	0.391001	1.20087	1.61884	3.89586	5e-05	0.000490444	yes
WLS	WLS	WLS	chr1:67701465-68232601	WT	KO2	OK	4.39203	13.4779	1.61764	2.05245	0.001	0.00676357	yes
DDX3Y	DDX3Y	DDX3Y	chrY:12903998-12920478	WT	KO2	OK	11.9286	36.5863	1.61687	6.93205	5e-05	0.000490444	yes
SERPINA5	SERPINA5	SERPINA5	chr14:94581368-94593120	WT	KO2	OK	0.184913	0.566654	1.61562	2.56472	5e-05	0.000490444	yes
SLC16A7	SLC16A7	SLC16A7	chr12:59596039-59789854	WT	KO2	OK	0.25921	0.79263	1.61253	4.91782	5e-05	0.000490444	yes
GLRB	GLRB	GLRB	chr4:157076124-157172090	WT	KO2	OK	0.618409	1.89061	1.61222	4.2223	5e-05	0.000490444	yes
CDH1	CDH1	CDH1	chr16:68737289-68835542	WT	KO2	OK	17.0439	51.9541	1.60799	6.99933	5e-05	0.000490444	yes
EVA1A	EVA1A	EVA1A	chr2:75492317-75569722	WT	KO2	OK	0.777118	2.36506	1.60567	3.46802	5e-05	0.000490444	yes
LAMA4	LAMA4	LAMA4	chr6:112107930-112306683	WT	KO2	OK	0.282221	0.858799	1.60549	2.08198	5e-05	0.000490444	yes
SLC7A8	SLC7A8	SLC7A8	chr14:23125294-23183660	WT	KO2	OK	0.436563	1.32768	1.60464	3.86715	5e-05	0.000490444	yes
CDCP1	CDCP1	CDCP1	chr3:45082273-45146422	WT	KO2	OK	7.09238	21.5385	1.60258	6.82447	5e-05	0.000490444	yes
ZFY	ZFY	ZFY	chrY:2935070-2982506	WT	KO2	OK	1.1624	3.52354	1.59992	5.58483	5e-05	0.000490444	yes
AOX1	AOX1	AOX1	chr2:200586007-200671494	WT	KO2	OK	0.31177	0.939406	1.59127	4.19011	5e-05	0.000490444	yes
LGALS9	LGALS9	LGALS9	chr17:27631147-27649560	WT	KO2	OK	46.3645	139.24	1.58648	6.81804	5e-05	0.000490444	yes
LOC400706	LOC400706	LOC400706	chr19:46057677-46077629	WT	KO2	OK	1.09975	3.29864	1.58469	5.03744	5e-05	0.000490444	yes
FAM167B	FAM167B	FAM167B	chr1:32247216-32248860	WT	KO2	OK	1.70901	5.08859	1.5741	3.94611	5e-05	0.000490444	yes
TPTEP1	TPTEP1	TPTEP1	chr22:16601910-16648830	WT	KO2	OK	0.372416	1.10661	1.57116	2.69249	0.00015	0.0013092	yes
SPATA17	SPATA17	SPATA17	chr1:217631323-217868153	WT	KO2	OK	0.605409	1.7843	1.55938	3.59919	5e-05	0.000490444	yes
KRT19	KRT19	KRT19	chr17:41523616-41528389	WT	KO2	OK	138.664	407.196	1.55413	6.80024	5e-05	0.000490444	yes
FHIT	FHIT	FHIT	chr3:59747277-61251461	WT	KO2	OK	0.241481	0.707727	1.55128	2.87307	5e-05	0.000490444	yes
GBP2	GBP2	GBP2	chr1:89106132-89126159	WT	KO2	OK	9.82051	28.7588	1.55013	6.62712	5e-05	0.000490444	yes
FOXA3	FOXA3	FOXA3	chr19:45864259-45873797	WT	KO2	OK	1.22891	3.59767	1.54968	4.56468	5e-05	0.000490444	yes
ST5	ST5	ST5	chr11:8693351-8910951	WT	KO2	OK	2.9792	8.68668	1.54388	5.64209	5e-05	0.000490444	yes
SEMA3F	SEMA3F	SEMA3F	chr3:50088907-50189075	WT	KO2	OK	5.77306	16.7819	1.5395	3.45092	5e-05	0.000490444	yes
SCIN	SCIN	SCIN	chr7:12570576-12653603	WT	KO2	OK	0.838293	2.43487	1.53832	4.0998	5e-05	0.000490444	yes
RNF182	RNF182	RNF182	chr6:13924445-13980009	WT	KO2	OK	0.574758	1.66913	1.53807	4.09833	5e-05	0.000490444	yes
LOC101927809	LOC101927809	LOC101927809	chr18:36180000-36187435	WT	KO2	OK	2.21744	6.42743	1.53535	3.35354	5e-05	0.000490444	yes
TMEM178A	TMEM178A	TMEM178A	chr2:39665497-39717963	WT	KO2	OK	0.405712	1.17125	1.52951	2.40996	0.0002	0.00168549	yes
SERINC5	SERINC5	SERINC5	chr5:80111226-80256082	WT	KO2	OK	5.60859	16.1208	1.52321	5.859	5e-05	0.000490444	yes
GACAT2	GACAT2	GACAT2	chr18:8695855-8707621	WT	KO2	OK	3.19644	9.17846	1.52178	4.26562	5e-05	0.000490444	yes
MPZL3	MPZL3	MPZL3	chr11:118226689-118252368	WT	KO2	OK	0.373806	1.06618	1.51208	3.62466	5e-05	0.000490444	yes
PDGFC	PDGFC	PDGFC	chr4:156761610-156971394	WT	KO2	OK	1.58973	4.53136	1.51116	4.98516	5e-05	0.000490444	yes
IFITM1	IFITM1	IFITM1	chr11:313990-315272	WT	KO2	OK	301.227	847.858	1.49297	6.50577	5e-05	0.000490444	yes
PID1	PID1	PID1	chr2:229023972-229271341	WT	KO2	OK	0.183094	0.514638	1.49097	2.31982	0.0004	0.00310726	yes
TMC8	TMC8	TMC8	chr17:78112917-78142968	WT	KO2	OK	4.2682	11.929	1.48278	3.91586	5e-05	0.000490444	yes
SLC35F3	SLC35F3	SLC35F3	chr1:233904711-234324518	WT	KO2	OK	1.78258	4.97873	1.48181	5.07219	5e-05	0.000490444	yes
MRAP2	MRAP2	MRAP2	chr6:84033700-84090886	WT	KO2	OK	0.860948	2.38989	1.47295	4.04673	5e-05	0.000490444	yes
DLL4	DLL4	DLL4	chr15:40929332-40939060	WT	KO2	OK	0.22772	0.629783	1.4676	3.0342	5e-05	0.000490444	yes
PLLP	PLLP	PLLP	chr16:57256096-57284672	WT	KO2	OK	1.88078	5.20124	1.46753	4.44211	5e-05	0.000490444	yes
VIPR1	VIPR1	VIPR1	chr3:42489298-42537573	WT	KO2	OK	0.207452	0.57353	1.46709	2.06556	0.0002	0.00168549	yes
USP9Y	USP9Y	USP9Y	chrY:12701230-12860843	WT	KO2	OK	2.04633	5.65616	1.46679	5.96235	5e-05	0.000490444	yes
TWIST1	TWIST1	TWIST1	chr7:19115467-19117672	WT	KO2	OK	1.0676	2.94593	1.46435	3.8646	5e-05	0.000490444	yes
CTSH	CTSH	CTSH	chr15:78921749-78945098	WT	KO2	OK	7.19243	19.841	1.46393	5.51126	5e-05	0.000490444	yes
SLITRK6	SLITRK6	SLITRK6	chr13:85792786-85799348	WT	KO2	OK	0.351091	0.966826	1.46141	3.72255	5e-05	0.000490444	yes
LHFP	LHFP	LHFP	chr13:39342891-39603219	WT	KO2	OK	1.07084	2.94522	1.45963	4.19345	5e-05	0.000490444	yes
UTY	UTY	UTY	chrY:13248378-13480670	WT	KO2	OK	1.80317	4.94399	1.45514	5.142	5e-05	0.000490444	yes
TXLNGY	TXLNGY	TXLNGY	chrY:19567357-19607170	WT	KO2	OK	5.53574	15.1036	1.44805	3.40648	5e-05	0.000490444	yes
CYP1B1	CYP1B1	CYP1B1	chr2:38067602-38076181	WT	KO2	OK	16.5063	44.9325	1.44474	6.29493	5e-05	0.000490444	yes
NALCN	NALCN	NALCN	chr13:100708324-101416462	WT	KO2	OK	0.274285	0.746544	1.44455	4.02233	5e-05	0.000490444	yes
RAB42	RAB42	RAB42	chr1:28592199-28594576	WT	KO2	OK	0.577563	1.56104	1.43445	2.4843	0.00015	0.0013092	yes
TXK	TXK	TXK	chr4:48066392-48134256	WT	KO2	OK	0.23306	0.626114	1.42572	2.7318	5e-05	0.000490444	yes
LINC00525	LINC00525	LINC00525	chr7:47761475-47766772	WT	KO2	OK	0.971611	2.59653	1.41814	3.22013	5e-05	0.000490444	yes
DDIT4L	DDIT4L	DDIT4L	chr4:100185869-100215505	WT	KO2	OK	1.47747	3.93379	1.41279	4.49191	5e-05	0.000490444	yes
ADAM12	ADAM12	ADAM12	chr10:126012384-126388558	WT	KO2	OK	0.669593	1.77296	1.40481	4.50086	5e-05	0.000490444	yes
EIF1AY	EIF1AY	EIF1AY	chrY:20575710-20593154	WT	KO2	OK	23.6541	62.4854	1.40143	5.89898	5e-05	0.000490444	yes
LOX	LOX	LOX	chr5:122063194-122078501	WT	KO2	OK	0.284019	0.749955	1.40081	3.23804	5e-05	0.000490444	yes
COL17A1	COL17A1	COL17A1	chr10:104031287-104085880	WT	KO2	OK	0.793077	2.09121	1.39881	4.66278	5e-05	0.000490444	yes
RGL1	RGL1	RGL1	chr1:183636046-183928551	WT	KO2	OK	0.881825	2.3205	1.39587	4.53051	5e-05	0.000490444	yes
RIMKLB	RIMKLB	RIMKLB	chr12:8681676-8783098	WT	KO2	OK	13.9944	36.7571	1.39317	4.39112	5e-05	0.000490444	yes
COBLL1	COBLL1	COBLL1	chr2:164680184-164849396	WT	KO2	OK	0.697232	1.82014	1.38434	4.84879	5e-05	0.000490444	yes
CFB	CFB	CFB	chr6_GL000256v2_alt:3247132-3253273	WT	KO2	OK	0.654113	1.70423	1.38151	3.65112	5e-05	0.000490444	yes
LIMA1	LIMA1	LIMA1	chr12:50175779-50283570	WT	KO2	OK	6.38817	16.6304	1.38035	5.65566	5e-05	0.000490444	yes
CACNA1I	CACNA1I	CACNA1I	chr22:39570752-39689736	WT	KO2	OK	0.228276	0.5917	1.37409	3.93208	5e-05	0.000490444	yes
MDK	MDK	MDK	chr11:46380783-46383837	WT	KO2	OK	43.7149	113.072	1.37105	5.55602	5e-05	0.000490444	yes
DNAJC12	DNAJC12	DNAJC12	chr10:67796668-67838179	WT	KO2	OK	65.6854	169.475	1.36743	5.85619	5e-05	0.000490444	yes
HIVEP3	HIVEP3	HIVEP3	chr1:41506364-42035925	WT	KO2	OK	1.11028	2.86363	1.36692	2.88128	5e-05	0.000490444	yes
HNF4G	HNF4G	HNF4G	chr8:75539967-75566826	WT	KO2	OK	1.19252	3.07343	1.36584	4.5412	5e-05	0.000490444	yes
SOX4	SOX4	SOX4	chr6:21593740-21598618	WT	KO2	OK	9.11576	23.4798	1.36498	5.67433	5e-05	0.000490444	yes
FXYD3	FXYD3	FXYD3	chr19:35115827-35124324	WT	KO2	OK	0.95013	2.44479	1.36351	2.47141	5e-05	0.000490444	yes
CH17-360D5.1	CH17-360D5.1	CH17-360D5.1	chr10:47918738-47923524	WT	KO2	OK	0.278066	0.713131	1.35874	1.97138	0.00265	0.0155916	yes
ZNF608	ZNF608	ZNF608	chr5:124636916-124745112	WT	KO2	OK	0.48843	1.25091	1.35676	4.10189	5e-05	0.000490444	yes
PLAT	PLAT	PLAT	chr8:42174717-42207724	WT	KO2	OK	1.80733	4.61404	1.35217	4.64695	5e-05	0.000490444	yes
MYO16-AS1	MYO16-AS1	MYO16-AS1	chr13:108596151-109208007	WT	KO2	OK	1.21413	3.09342	1.34928	1.88327	0.00255	0.0151005	yes
SYCP2	SYCP2	SYCP2	chr20:59863556-59933663	WT	KO2	OK	0.791411	2.01559	1.34871	4.40582	5e-05	0.000490444	yes
MOXD1	MOXD1	MOXD1	chr6:132296054-132401534	WT	KO2	OK	0.279401	0.708164	1.34175	2.82587	5e-05	0.000490444	yes
LAPTM5	LAPTM5	LAPTM5	chr1:30732467-30757836	WT	KO2	OK	0.895916	2.26536	1.33831	3.66747	5e-05	0.000490444	yes
GFRA1	GFRA1	GFRA1	chr10:116056930-116273645	WT	KO2	OK	0.31943	0.804314	1.33226	4.0428	5e-05	0.000490444	yes
RBMS3	RBMS3	RBMS3	chr3:29281311-30010395	WT	KO2	OK	0.466675	1.17422	1.33121	1.85608	0.00045	0.00342385	yes
NR5A2	NR5A2	NR5A2	chr1:200027601-200177422	WT	KO2	OK	7.51143	18.7728	1.32148	5.52379	5e-05	0.000490444	yes
LAMP3	LAMP3	LAMP3	chr3:183122214-183162879	WT	KO2	OK	14.5286	36.3094	1.32145	5.47815	5e-05	0.000490444	yes
SLCO1B1	SLCO1B1	SLCO1B1	chr12:21131193-21239796	WT	KO2	OK	0.688211	1.71486	1.31716	3.53272	5e-05	0.000490444	yes
TPPP3	TPPP3	TPPP3	chr16:67389806-67393535	WT	KO2	OK	18.4825	46.051	1.31707	5.23129	5e-05	0.000490444	yes
MUC13	MUC13	MUC13	chr3:124905441-124934751	WT	KO2	OK	17.3459	42.9496	1.30805	5.56568	5e-05	0.000490444	yes
VCAN	VCAN	VCAN	chr5:83471673-83582303	WT	KO2	OK	9.37994	23.209	1.30703	4.76663	5e-05	0.000490444	yes
CD70	CD70	CD70	chr19:6585838-6591152	WT	KO2	OK	18.5515	45.8698	1.30601	5.10533	5e-05	0.000490444	yes
SERTAD4-AS1	SERTAD4-AS1	SERTAD4-AS1	chr1:210231458-210243095	WT	KO2	OK	0.717477	1.77087	1.30345	1.64042	0.008	0.0393623	yes
STC1	STC1	STC1	chr8:23841920-23854807	WT	KO2	OK	12.8099	31.6131	1.30326	5.55937	5e-05	0.000490444	yes
HERC3	HERC3	HERC3	chr4:88592422-88708542	WT	KO2	OK	2.34371	5.77516	1.30107	4.53188	5e-05	0.000490444	yes
SCML1	SCML1	SCML1	chrX:17737448-17754988	WT	KO2	OK	6.39645	15.756	1.30056	5.065	5e-05	0.000490444	yes
UST	UST	UST	chr6:148747134-149076990	WT	KO2	OK	1.14358	2.8141	1.29911	4.17238	5e-05	0.000490444	yes
PITX2	PITX2	PITX2	chr4:110617423-110642123	WT	KO2	OK	0.580967	1.42957	1.29905	2.70597	5e-05	0.000490444	yes
AUTS2	AUTS2	AUTS2	chr7:69598918-70793068	WT	KO2	OK	2.06388	5.07383	1.29772	4.59265	5e-05	0.000490444	yes
LINC00704	LINC00704	LINC00704	chr10:4650184-4678070	WT	KO2	OK	0.838605	2.05405	1.29241	2.92148	5e-05	0.000490444	yes
RPS4Y1	RPS4Y1	RPS4Y1	chrY:2841581-2866956	WT	KO2	OK	134.978	330.573	1.29225	5.67846	5e-05	0.000490444	yes
DAPP1	DAPP1	DAPP1	chr4:99816823-99870189	WT	KO2	OK	0.255378	0.624962	1.29113	2.53587	0.0001	0.000919048	yes
MMP7	MMP7	MMP7	chr11:102520507-102530753	WT	KO2	OK	176.613	432.102	1.29078	5.65822	5e-05	0.000490444	yes
GATA2	GATA2	GATA2	chr3:128479421-128503207	WT	KO2	OK	0.579409	1.41098	1.28404	3.17447	5e-05	0.000490444	yes
TTTY15	TTTY15	TTTY15	chrY:12662366-12692224	WT	KO2	OK	0.79094	1.92536	1.28349	4.17914	5e-05	0.000490444	yes
C5orf38	C5orf38	C5orf38	chr5:2752130-2755397	WT	KO2	OK	0.418823	1.01906	1.28283	1.28425	0.0024	0.0143801	yes
FAR2	FAR2	FAR2	chr12:29149002-29335616	WT	KO2	OK	0.232541	0.564557	1.27963	2.16466	5e-05	0.000490444	yes
GBP1P1	GBP1P1	GBP1P1	chr1:89407678-89424934	WT	KO2	OK	1.1385	2.75841	1.2767	3.04847	5e-05	0.000490444	yes
SGPP2	SGPP2	SGPP2	chr2:222424051-222562622	WT	KO2	OK	2.25151	5.45181	1.27584	4.82855	5e-05	0.000490444	yes
RAB27B	RAB27B	RAB27B	chr18:54828476-54895516	WT	KO2	OK	8.64606	20.8509	1.27	5.32562	5e-05	0.000490444	yes
FHDC1	FHDC1	FHDC1	chr4:152942982-152979696	WT	KO2	OK	0.429078	1.03271	1.26713	3.82848	5e-05	0.000490444	yes
CERS1	CERS1	CERS1	chr19:18868545-18896727	WT	KO2	OK	0.295716	0.710914	1.26546	2.02983	0.00075	0.00527851	yes
HSH2D	HSH2D	HSH2D	chr19:16134027-16158573	WT	KO2	OK	5.16128	12.394	1.26384	4.73137	5e-05	0.000490444	yes
TMC5	TMC5	TMC5	chr16:19410538-19499112	WT	KO2	OK	8.49041	20.3707	1.26259	5.09529	5e-05	0.000490444	yes
SBK1	SBK1	SBK1	chr16:28292518-28323849	WT	KO2	OK	0.340964	0.815494	1.25806	3.3248	5e-05	0.000490444	yes
ST8SIA4	ST8SIA4	ST8SIA4	chr5:100806934-100903285	WT	KO2	OK	6.15208	14.7042	1.25708	5.00518	5e-05	0.000490444	yes
C10orf107	C10orf107	C10orf107	chr10:61662960-61766333	WT	KO2	OK	0.382239	0.912153	1.2548	1.96081	0.00255	0.0151005	yes
AGR2	AGR2	AGR2	chr7:16792639-16805114	WT	KO2	OK	842.821	2009.82	1.25377	5.25194	5e-05	0.000490444	yes
TMPRSS3	TMPRSS3	TMPRSS3	chr21:42371886-42396846	WT	KO2	OK	0.639832	1.52324	1.25138	2.68364	5e-05	0.000490444	yes
CXCL8	CXCL8	CXCL8	chr4:73740505-73743716	WT	KO2	OK	28.7921	68.4234	1.24882	5.28031	5e-05	0.000490444	yes
PRICKLE1	PRICKLE1	PRICKLE1	chr12:42458337-42589770	WT	KO2	OK	0.972625	2.30762	1.24645	4.05652	5e-05	0.000490444	yes
PCSK6	PCSK6	PCSK6	chr15:101303927-101489984	WT	KO2	OK	4.34722	10.3062	1.24535	4.92497	5e-05	0.000490444	yes
KRT85	KRT85	KRT85	chr12:52360005-52367525	WT	KO2	OK	0.256836	0.608748	1.245	1.95508	0.00115	0.00763491	yes
C1R	C1R	C1R	chr12:7080210-7092447	WT	KO2	OK	115.05	271.076	1.23644	5.37275	5e-05	0.000490444	yes
SEMA3B	SEMA3B	SEMA3B	chr3:50267557-50277171	WT	KO2	OK	16.9029	39.7008	1.2319	5.10216	5e-05	0.000490444	yes
GFOD1	GFOD1	GFOD1	chr6:13363354-13487637	WT	KO2	OK	0.483385	1.13131	1.22675	2.48082	5e-05	0.000490444	yes
SYTL4	SYTL4	SYTL4	chrX:100674490-100732148	WT	KO2	OK	2.19304	5.1168	1.22231	4.43906	5e-05	0.000490444	yes
IGDCC4	IGDCC4	IGDCC4	chr15:65381486-65423072	WT	KO2	OK	2.39538	5.57574	1.21891	4.83574	5e-05	0.000490444	yes
TTC9	TTC9	TTC9	chr14:70641786-70675360	WT	KO2	OK	1.48201	3.44769	1.21808	4.4003	5e-05	0.000490444	yes
SSTR5-AS1	SSTR5-AS1	SSTR5-AS1	chr16:1064080-1081454	WT	KO2	OK	0.348996	0.811026	1.21654	2.20627	0.00135	0.0087466	yes
ZSWIM5	ZSWIM5	ZSWIM5	chr1:45016403-45206578	WT	KO2	OK	0.863132	2.00392	1.21518	4.08624	5e-05	0.000490444	yes
ZNF853	ZNF853	ZNF853	chr7:6615895-6624290	WT	KO2	OK	0.705003	1.63549	1.21402	3.53039	5e-05	0.000490444	yes
LINC01239	LINC01239	LINC01239	chr9:22646199-22824213	WT	KO2	OK	0.26698	0.619144	1.21355	2.20854	0.0007	0.00498809	yes
MUC1	MUC1	MUC1	chr1:155185823-155192915	WT	KO2	OK	21.1208	48.9795	1.21351	4.7387	5e-05	0.000490444	yes
CTSS	CTSS	CTSS	chr1:150730195-150765957	WT	KO2	OK	47.3481	109.615	1.21107	5.29293	5e-05	0.000490444	yes
PTPRG	PTPRG	PTPRG	chr3:61561568-62318947	WT	KO2	OK	1.17751	2.71614	1.20582	4.24324	5e-05	0.000490444	yes
TMC6	TMC6	TMC6	chr17:78112917-78142968	WT	KO2	OK	6.06209	13.9816	1.20564	2.70187	5e-05	0.000490444	yes
MX2	MX2	MX2	chr21:41362022-41408942	WT	KO2	OK	13.8742	31.9916	1.20529	5.12495	5e-05	0.000490444	yes
LPAR6	LPAR6	LPAR6	chr13:48303746-48481890	WT	KO2	OK	2.34944	5.41541	1.20476	1.82565	0.0022	0.0133866	yes
MIA2	MIA2	MIA2	chr14:39233920-39253371	WT	KO2	OK	2.14987	4.9483	1.20268	3.95879	5e-05	0.000490444	yes
SULF2	SULF2	SULF2	chr20:47657405-47786616	WT	KO2	OK	2.88849	6.63792	1.20042	4.57438	5e-05	0.000490444	yes
IFNGR1	IFNGR1	IFNGR1	chr6:137197483-137219430	WT	KO2	OK	34.1754	78.5303	1.20029	5.16889	5e-05	0.000490444	yes
TENM3	TENM3	TENM3	chr4:182243430-182803024	WT	KO2	OK	0.578596	1.32513	1.19551	4.17594	5e-05	0.000490444	yes
HLX	HLX	HLX	chr1:220832762-220885058	WT	KO2	OK	1.01293	2.31891	1.19491	3.37163	5e-05	0.000490444	yes
ZNF185	ZNF185	ZNF185	chrX:152914441-152973481	WT	KO2	OK	5.33514	12.1667	1.18933	4.7426	5e-05	0.000490444	yes
NCKAP5	NCKAP5	NCKAP5	chr2:132671798-133568460	WT	KO2	OK	0.82996	1.89174	1.1886	3.82983	5e-05	0.000490444	yes
ARRDC3	ARRDC3	ARRDC3	chr5:91368723-91420715	WT	KO2	OK	14.9015	33.8647	1.18433	4.88427	5e-05	0.000490444	yes
CXCL2	CXCL2	CXCL2	chr4:74097036-74099280	WT	KO2	OK	29.2678	66.5087	1.18423	4.91917	5e-05	0.000490444	yes
GATA3	GATA3	GATA3	chr10:8054703-8075201	WT	KO2	OK	3.70428	8.40955	1.18283	4.51014	5e-05	0.000490444	yes
CBX3P2	CBX3P2	CBX3P2	chr18:2652169-2655395	WT	KO2	OK	0.428502	0.972781	1.18281	2.06352	0.0014	0.00901937	yes
PDE5A	PDE5A	PDE5A	chr4:119454782-119628826	WT	KO2	OK	0.267704	0.607334	1.18185	2.47146	0.0002	0.00168549	yes
GLIPR2	GLIPR2	GLIPR2	chr9:36136535-36163913	WT	KO2	OK	1.12916	2.55631	1.17882	3.04485	5e-05	0.000490444	yes
EPB41L4A-AS2	EPB41L4A-AS2	EPB41L4A-AS2	chr5:112419582-112420981	WT	KO2	OK	0.333876	0.755764	1.17862	1.82064	0.004	0.0219952	yes
ANKRD22	ANKRD22	ANKRD22	chr10:88802729-88851975	WT	KO2	OK	0.994592	2.24696	1.1758	3.77119	5e-05	0.000490444	yes
CASP1	CASP1	CASP1	chr11:105025509-105035157	WT	KO2	OK	10.8971	24.5348	1.17088	3.25737	5e-05	0.000490444	yes
TGFA	TGFA	TGFA	chr2:70447279-70554015	WT	KO2	OK	3.88269	8.72879	1.16872	4.61316	5e-05	0.000490444	yes
CTSC	CTSC	CTSC	chr11:88293591-88337787	WT	KO2	OK	52.9479	118.88	1.16686	4.98537	5e-05	0.000490444	yes
EIF4E3	EIF4E3	EIF4E3	chr3:71679288-71755177	WT	KO2	OK	0.829342	1.86137	1.16633	3.88993	5e-05	0.000490444	yes
THBD	THBD	THBD	chr20:23045632-23049664	WT	KO2	OK	11.6447	26.0795	1.16325	4.97553	5e-05	0.000490444	yes
NNMT	NNMT	NNMT	chr11:114295812-114312516	WT	KO2	OK	120.688	270.225	1.16289	5.10496	5e-05	0.000490444	yes
SLC16A2	SLC16A2	SLC16A2	chrX:74421492-74533929	WT	KO2	OK	3.7569	8.41193	1.16289	4.59393	5e-05	0.000490444	yes
SLC46A3	SLC46A3	SLC46A3	chr13:28700080-28719013	WT	KO2	OK	3.42348	7.65928	1.16174	4.36417	5e-05	0.000490444	yes
ENOX1	ENOX1	ENOX1	chr13:43213529-43786980	WT	KO2	OK	0.765993	1.70822	1.15709	3.17354	5e-05	0.000490444	yes
TMEM154	TMEM154	TMEM154	chr4:152626113-152680165	WT	KO2	OK	0.580398	1.29086	1.15322	3.10551	5e-05	0.000490444	yes
MT1X	MT1X	MT1X	chr16:56682469-56684196	WT	KO2	OK	60.9203	135.128	1.14934	4.42202	5e-05	0.000490444	yes
MARCKS	MARCKS	MARCKS	chr6:113857334-113863475	WT	KO2	OK	14.4485	32.0361	1.14878	4.83738	5e-05	0.000490444	yes
RTP4	RTP4	RTP4	chr3:187368379-187371581	WT	KO2	OK	10.1529	22.505	1.14835	4.20412	5e-05	0.000490444	yes
TFPI2	TFPI2	TFPI2	chr7:93885396-93893585	WT	KO2	OK	161.77	358.236	1.14697	4.97064	5e-05	0.000490444	yes
CNTN1	CNTN1	CNTN1	chr12:40692441-41072411	WT	KO2	OK	29.2781	64.8157	1.14652	4.94883	5e-05	0.000490444	yes
BEGAIN	BEGAIN	BEGAIN	chr14:100537146-100569794	WT	KO2	OK	0.893682	1.97518	1.14415	3.22728	5e-05	0.000490444	yes
IDO1	IDO1	IDO1	chr8:39913808-39928791	WT	KO2	OK	37.5882	82.9043	1.14117	4.9312	5e-05	0.000490444	yes
MMAA	MMAA	MMAA	chr4:145619387-145660035	WT	KO2	OK	0.642625	1.41541	1.13917	3.62388	5e-05	0.000490444	yes
LINC01021	LINC01021	LINC01021	chr5:27472291-27496401	WT	KO2	OK	2.34153	5.14114	1.13464	3.22601	5e-05	0.000490444	yes
SLC8A2	SLC8A2	SLC8A2	chr19:47428021-47472050	WT	KO2	OK	0.903781	1.98197	1.13289	3.72689	5e-05	0.000490444	yes
LMO2	LMO2	LMO2	chr11:33858575-33892289	WT	KO2	OK	3.61611	7.92786	1.13249	3.78974	5e-05	0.000490444	yes
NOV	NOV	NOV	chr8:119416311-119424438	WT	KO2	OK	2.05254	4.49942	1.13233	3.77229	5e-05	0.000490444	yes
MGAT4A	MGAT4A	MGAT4A	chr2:98619105-98731126	WT	KO2	OK	1.05105	2.30219	1.13117	3.16796	5e-05	0.000490444	yes
TNFRSF1B	TNFRSF1B	TNFRSF1B	chr1:12166942-12209220	WT	KO2	OK	1.58013	3.45987	1.13067	3.84628	5e-05	0.000490444	yes
C12orf75	C12orf75	C12orf75	chr12:105330635-105371518	WT	KO2	OK	67.3771	147.162	1.12707	4.91266	5e-05	0.000490444	yes
MAP3K1	MAP3K1	MAP3K1	chr5:56815072-56896151	WT	KO2	OK	1.95749	4.26821	1.12463	4.31732	5e-05	0.000490444	yes
CCT6B	CCT6B	CCT6B	chr17:34927858-34961509	WT	KO2	OK	1.81435	3.95119	1.12283	3.41091	5e-05	0.000490444	yes
C8orf4	C8orf4	C8orf4	chr8:40153467-40155308	WT	KO2	OK	84.4601	183.714	1.12112	4.90784	5e-05	0.000490444	yes
CD38	CD38	CD38	chr4:15778264-15853243	WT	KO2	OK	30.217	65.6382	1.11917	4.84287	5e-05	0.000490444	yes
FN1	FN1	FN1	chr2:215360439-215436070	WT	KO2	OK	183.867	399.167	1.11833	4.21139	5e-05	0.000490444	yes
EPB41L4A	EPB41L4A	EPB41L4A	chr5:112162617-112419313	WT	KO2	OK	4.56669	9.91181	1.118	4.54866	5e-05	0.000490444	yes
LINC01508	LINC01508	LINC01508	chr9:90300895-90433489	WT	KO2	OK	0.426444	0.9226	1.11335	1.55746	0.01	0.0471379	yes
DPP4	DPP4	DPP4	chr2:161992244-162074542	WT	KO2	OK	0.874412	1.89165	1.11326	3.44579	5e-05	0.000490444	yes
CADM3	CADM3	CADM3	chr1:159171586-159203142	WT	KO2	OK	0.372955	0.806797	1.11321	2.33439	5e-05	0.000490444	yes
BCL2L14	BCL2L14	BCL2L14	chr12:12070943-12099693	WT	KO2	OK	0.349948	0.756922	1.11301	1.92436	0.0013	0.00847474	yes
TBX3	TBX3	TBX3	chr12:114670253-114684164	WT	KO2	OK	4.79187	10.3634	1.11284	4.53828	5e-05	0.000490444	yes
ARX	ARX	ARX	chrX:25003695-25015948	WT	KO2	OK	0.315375	0.681194	1.111	2.32669	0.00025	0.00205504	yes
SYNGR2	SYNGR2	SYNGR2	chr17:78168544-78172928	WT	KO2	OK	125.864	271.695	1.11013	4.87334	5e-05	0.000490444	yes
DCLK1	DCLK1	DCLK1	chr13:35768651-36131377	WT	KO2	OK	1.41651	3.0518	1.10732	4.08171	5e-05	0.000490444	yes
FRMD3	FRMD3	FRMD3	chr9:83242989-83538433	WT	KO2	OK	2.10789	4.52541	1.10225	3.72128	5e-05	0.000490444	yes
DRC1	DRC1	DRC1	chr2:26401911-26456711	WT	KO2	OK	0.331867	0.712258	1.10179	2.23527	0.00075	0.00527851	yes
SLCO4A1	SLCO4A1	SLCO4A1	chr20:62642444-62672295	WT	KO2	OK	2.43117	5.21543	1.10113	3.61908	5e-05	0.000490444	yes
LOC105377763	LOC105377763	LOC105377763	chr5:179657761-179674295	WT	KO2	OK	0.641552	1.37599	1.10083	1.73874	0.0058	0.0301508	yes
CREG2	CREG2	CREG2	chr2:101348353-101387503	WT	KO2	OK	0.293162	0.628142	1.09939	2.43628	5e-05	0.000490444	yes
DKK3	DKK3	DKK3	chr11:11962995-12009370	WT	KO2	OK	14.9471	32.0084	1.09858	4.63189	5e-05	0.000490444	yes
ICA1	ICA1	ICA1	chr7:8113184-8343281	WT	KO2	OK	1.72304	3.67527	1.09289	3.33421	5e-05	0.000490444	yes
LOC100288152	LOC100288152	LOC100288152	chr5:470509-524434	WT	KO2	OK	2.28038	4.84913	1.08845	2.02595	0.00145	0.00929343	yes
PCMTD2	PCMTD2	PCMTD2	chr20_KI270870v1_alt:164285-183433	WT	KO2	OK	0.88287	1.87683	1.08802	3.27246	5e-05	0.000490444	yes
COL5A1	COL5A1	COL5A1	chr9:134641804-134872618	WT	KO2	OK	10.5822	22.4594	1.08569	4.70062	5e-05	0.000490444	yes
RAB38	RAB38	RAB38	chr11:88113246-88175467	WT	KO2	OK	0.912037	1.93257	1.08336	2.53792	5e-05	0.000490444	yes
DDAH1	DDAH1	DDAH1	chr1:85318484-85578363	WT	KO2	OK	2.17038	4.59667	1.08264	3.92613	5e-05	0.000490444	yes
PELI2	PELI2	PELI2	chr14:56118374-56301313	WT	KO2	OK	1.97873	4.18128	1.07937	3.98237	5e-05	0.000490444	yes
FRAS1	FRAS1	FRAS1	chr4:78057569-78544269	WT	KO2	OK	1.24843	2.63514	1.07776	4.30302	5e-05	0.000490444	yes
HPGD	HPGD	HPGD	chr4:174490176-174522898	WT	KO2	OK	33.837	71.3246	1.0758	4.62454	5e-05	0.000490444	yes
HYAL1	HYAL1	HYAL1	chr3:50299888-50312381	WT	KO2	OK	2.9237	6.15786	1.07464	3.04332	5e-05	0.000490444	yes
CD47	CD47	CD47	chr3:108043093-108091088	WT	KO2	OK	18.1923	38.2795	1.07324	4.69654	5e-05	0.000490444	yes
TJP2	TJP2	TJP2	chr9:69121263-69255208	WT	KO2	OK	3.00247	6.31364	1.07233	4.16525	5e-05	0.000490444	yes
CD24	CD24	CD24	chr6:106969830-106976855	WT	KO2	OK	147.671	309.914	1.06948	4.62135	5e-05	0.000490444	yes
FANK1	FANK1	FANK1	chr10:125896538-126009592	WT	KO2	OK	1.63395	3.42633	1.0683	2.79527	5e-05	0.000490444	yes
APOBEC3G	APOBEC3G	APOBEC3G	chr22:39077004-39087743	WT	KO2	OK	0.612037	1.27879	1.06309	2.3704	0.00015	0.0013092	yes
PLSCR4	PLSCR4	PLSCR4	chr3:146192335-146251179	WT	KO2	OK	5.82739	12.1726	1.06272	4.16533	5e-05	0.000490444	yes
C9orf40	C9orf40	C9orf40	chr9:74946582-74952886	WT	KO2	OK	1.56152	3.25894	1.06145	3.30462	5e-05	0.000490444	yes
PRR15	PRR15	PRR15	chr7:29563810-29567295	WT	KO2	OK	35.1583	73.3309	1.06056	4.56835	5e-05	0.000490444	yes
AK5	AK5	AK5	chr1:77281976-77559969	WT	KO2	OK	1.14287	2.38192	1.05947	3.32245	5e-05	0.000490444	yes
CASP4	CASP4	CASP4	chr11:104942866-104968598	WT	KO2	OK	30.2774	62.8485	1.05364	4.47461	5e-05	0.000490444	yes
FAP	FAP	FAP	chr2:162114440-162243535	WT	KO2	OK	0.257246	0.533835	1.05325	1.88256	0.00125	0.00819165	yes
SEMA4G	SEMA4G	SEMA4G	chr10:100972528-100987519	WT	KO2	OK	3.51709	7.29564	1.05265	2.00876	0.00055	0.00405196	yes
LOC93429	LOC93429	LOC93429	chr19:46210241-46214837	WT	KO2	OK	2.07777	4.30931	1.05242	3.1697	5e-05	0.000490444	yes
VWA5A	VWA5A	VWA5A	chr11:124115403-124146911	WT	KO2	OK	1.3096	2.71607	1.0524	2.93618	5e-05	0.000490444	yes
NFIA	NFIA	NFIA	chr1:61077273-61462788	WT	KO2	OK	1.02765	2.1292	1.05097	3.88175	5e-05	0.000490444	yes
CCDC71L	CCDC71L	CCDC71L	chr7:106656764-106661188	WT	KO2	OK	4.67488	9.6457	1.04496	4.2096	5e-05	0.000490444	yes
SPTSSA	SPTSSA	SPTSSA	chr14:34432937-34462262	WT	KO2	OK	46.9531	96.8401	1.04438	4.45829	5e-05	0.000490444	yes
RHOV	RHOV	RHOV	chr15:40872213-40874289	WT	KO2	OK	11.0956	22.8324	1.0411	4.14403	5e-05	0.000490444	yes
ASS1	ASS1	ASS1	chr9:130444706-130501274	WT	KO2	OK	31.1412	64.0535	1.04045	4.43068	5e-05	0.000490444	yes
ITPKB	ITPKB	ITPKB	chr1:226631689-226739175	WT	KO2	OK	0.800143	1.64557	1.04025	3.4749	5e-05	0.000490444	yes
BANK1	BANK1	BANK1	chr4:101790606-102074812	WT	KO2	OK	1.51703	3.11856	1.03963	3.35357	5e-05	0.000490444	yes
SPATA18	SPATA18	SPATA18	chr4:52051330-52097306	WT	KO2	OK	0.290678	0.597043	1.03841	2.41986	5e-05	0.000490444	yes
ANPEP	ANPEP	ANPEP	chr15:89784894-89814840	WT	KO2	OK	7.28966	14.9658	1.03775	4.28537	5e-05	0.000490444	yes
C1orf21	C1orf21	C1orf21	chr1:184387015-184629021	WT	KO2	OK	0.418667	0.858712	1.03637	3.37102	5e-05	0.000490444	yes
CNIH3	CNIH3	CNIH3	chr1:224434639-224740549	WT	KO2	OK	0.282184	0.578014	1.03447	1.20973	0.00025	0.00205504	yes
ETV1	ETV1	ETV1	chr7:13891230-13991425	WT	KO2	OK	1.28863	2.63675	1.03292	3.73386	5e-05	0.000490444	yes
RNF138	RNF138	RNF138	chr18:32091854-32131561	WT	KO2	OK	2.94482	6.02182	1.03202	3.69224	5e-05	0.000490444	yes
CEACAM1	CEACAM1	CEACAM1	chr19:42397127-42652355	WT	KO2	OK	62.3205	127.305	1.03051	4.45269	5e-05	0.000490444	yes
ASAP3	ASAP3	ASAP3	chr1:23428562-23484257	WT	KO2	OK	2.45693	5.01482	1.02934	3.82796	5e-05	0.000490444	yes
SAMD9L	SAMD9L	SAMD9L	chr7:93130053-93148388	WT	KO2	OK	15.7175	32.0805	1.02932	4.36367	5e-05	0.000490444	yes
COBL	COBL	COBL	chr7:51016211-51316818	WT	KO2	OK	1.66006	3.38677	1.02867	3.76133	5e-05	0.000490444	yes
PADI1	PADI1	PADI1	chr1:17205125-17246006	WT	KO2	OK	0.396879	0.809135	1.02768	2.57272	5e-05	0.000490444	yes
ZNF691	ZNF691	ZNF691	chr1:42846572-42852475	WT	KO2	OK	4.81612	9.81749	1.02748	3.6622	5e-05	0.000490444	yes
FAM134B	FAM134B	FAM134B	chr5:16473037-16629969	WT	KO2	OK	0.90267	1.8394	1.02697	2.86248	5e-05	0.000490444	yes
CYP3A5	CYP3A5	CYP3A5	chr7:99648188-99680026	WT	KO2	OK	5.04596	10.2805	1.02671	3.25532	5e-05	0.000490444	yes
DNER	DNER	DNER	chr2:229357628-229714570	WT	KO2	OK	0.773344	1.57137	1.02284	2.95902	5e-05	0.000490444	yes
ISLR	ISLR	ISLR	chr15:74173745-74176871	WT	KO2	OK	0.452322	0.918425	1.02181	2.18023	0.00015	0.0013092	yes
NPR1	NPR1	NPR1	chr1:153678687-153693992	WT	KO2	OK	1.47574	2.99307	1.02018	3.5211	5e-05	0.000490444	yes
HIST2H2BE	HIST2H2BE	HIST2H2BE	chr1:149884459-149886682	WT	KO2	OK	4.92254	9.95643	1.01622	3.73467	5e-05	0.000490444	yes
LIFR	LIFR	LIFR	chr5:38474962-38671216	WT	KO2	OK	3.29061	6.62618	1.00982	4.06681	5e-05	0.000490444	yes
TTYH2	TTYH2	TTYH2	chr17:74213556-74262018	WT	KO2	OK	0.942493	1.8976	1.00962	3.06574	5e-05	0.000490444	yes
PGAM2	PGAM2	PGAM2	chr7:44062726-44065587	WT	KO2	OK	1.1884	2.39018	1.0081	2.06049	0.001	0.00676357	yes
KIAA1462	KIAA1462	KIAA1462	chr10:30012799-30059559	WT	KO2	OK	0.974177	1.9588	1.00771	3.7139	5e-05	0.000490444	yes
ST3GAL4	ST3GAL4	ST3GAL4	chr11:126355644-126414641	WT	KO2	OK	19.5051	39.1721	1.00597	4.22936	5e-05	0.000490444	yes
ACBD7	ACBD7	ACBD7	chr10:15075474-15088776	WT	KO2	OK	0.845609	1.69712	1.00502	2.96438	5e-05	0.000490444	yes
DPYD	DPYD	DPYD	chr1:97077743-97921059	WT	KO2	OK	3.81555	7.65635	1.00477	3.78287	5e-05	0.000490444	yes
MIR100HG	MIR100HG	MIR100HG	chr11:122028328-122422871	WT	KO2	OK	2.10861	4.23062	1.00458	3.28818	5e-05	0.000490444	yes
BTC	BTC	BTC	chr4:74744759-74794686	WT	KO2	OK	3.16329	6.32761	1.00024	3.56418	5e-05	0.000490444	yes
SVBP	SVBP	SVBP	chr1:42807051-42844989	WT	KO2	OK	16.4	32.7937	0.999724	2.52576	5e-05	0.000490444	yes
IVNS1ABP	IVNS1ABP	IVNS1ABP	chr1:185296387-185317329	WT	KO2	OK	17.7014	35.3897	0.999464	4.35759	5e-05	0.000490444	yes
GLS	GLS	GLS	chr2:190880820-190965544	WT	KO2	OK	19.6897	39.298	0.997015	4.32972	5e-05	0.000490444	yes
CTSB	CTSB	CTSB	chr8:11842524-11868150	WT	KO2	OK	149.427	298.151	0.996605	4.26836	5e-05	0.000490444	yes
EEA1	EEA1	EEA1	chr12:92772508-92929331	WT	KO2	OK	2.16186	4.3102	0.995484	3.93067	5e-05	0.000490444	yes
FLRT3	FLRT3	FLRT3	chr20:13995499-16053196	WT	KO2	OK	13.6695	27.2218	0.993801	4.17732	5e-05	0.000490444	yes
IFI44	IFI44	IFI44	chr1:78649788-78664078	WT	KO2	OK	66.6667	132.698	0.993105	4.22631	5e-05	0.000490444	yes
IFI44L	IFI44L	IFI44L	chr1:78620381-78646145	WT	KO2	OK	2.67615	5.31769	0.990641	3.87391	5e-05	0.000490444	yes
ANXA3	ANXA3	ANXA3	chr4:78551587-78610451	WT	KO2	OK	52.9112	105.077	0.989801	4.32465	5e-05	0.000490444	yes
GSDMB	GSDMB	GSDMB	chr17:39904594-39918650	WT	KO2	OK	5.42164	10.751	0.98767	3.51256	5e-05	0.000490444	yes
LTBP2	LTBP2	LTBP2	chr14:74498182-74612331	WT	KO2	OK	3.4332	6.8064	0.987337	4.1261	5e-05	0.000490444	yes
TRAM1	TRAM1	TRAM1	chr8:70573217-70608459	WT	KO2	OK	75.1165	148.77	0.985885	4.16628	5e-05	0.000490444	yes
ERMAP	ERMAP	ERMAP	chr1:42807051-42844989	WT	KO2	OK	4.08516	8.06539	0.981353	2.88316	5e-05	0.000490444	yes
NFIX	NFIX	NFIX	chr19:12995769-13098796	WT	KO2	OK	2.06107	4.06465	0.979734	3.71397	5e-05	0.000490444	yes
ITGB2-AS1	ITGB2-AS1	ITGB2-AS1	chr21:44885953-44929680	WT	KO2	OK	1.01028	1.99159	0.979171	1.63417	0.0034	0.0192601	yes
MYBL1	MYBL1	MYBL1	chr8:66562174-66613249	WT	KO2	OK	0.932643	1.83725	0.978148	3.21906	5e-05	0.000490444	yes
REPS2	REPS2	REPS2	chrX:16946690-17153280	WT	KO2	OK	0.363929	0.716523	0.977355	2.9265	5e-05	0.000490444	yes
SPP1	SPP1	SPP1	chr4:87975649-87983411	WT	KO2	OK	456.581	898.909	0.977304	4.09882	5e-05	0.000490444	yes
CLEC2D	CLEC2D	CLEC2D	chr12:9669707-9699555	WT	KO2	OK	0.918888	1.8073	0.975873	3.1813	5e-05	0.000490444	yes
SUSD1	SUSD1	SUSD1	chr9:112040780-112175297	WT	KO2	OK	9.42454	18.5252	0.974998	4.04166	5e-05	0.000490444	yes
ZNF474	ZNF474	ZNF474	chr5:122129512-122153571	WT	KO2	OK	0.271377	0.533071	0.974025	1.59459	0.0074	0.0368467	yes
HLA-C	HLA-C	HLA-C	chr6_GL000256v2_alt:2570706-2574084	WT	KO2	OK	0.425114	0.834787	0.97356	1.7712	0.0043	0.0234007	yes
TSPAN13	TSPAN13	TSPAN13	chr7:16753725-16784536	WT	KO2	OK	10.6484	20.8948	0.9725	3.84836	5e-05	0.000490444	yes
ARHGEF37	ARHGEF37	ARHGEF37	chr5:149581571-149634964	WT	KO2	OK	0.850216	1.66663	0.971037	3.11841	5e-05	0.000490444	yes
ZNF862	ZNF862	ZNF862	chr7:149838419-149867479	WT	KO2	OK	0.810802	1.58649	0.968413	3.28448	5e-05	0.000490444	yes
SLC25A27	SLC25A27	SLC25A27	chr6:46652914-46735693	WT	KO2	OK	0.424999	0.831229	0.967786	1.95952	0.0006	0.0043733	yes
LYRM1	LYRM1	LYRM1	chr16:20854924-20925011	WT	KO2	OK	14.2596	27.8802	0.967308	2.9202	5e-05	0.000490444	yes
BIK	BIK	BIK	chr22:43110747-43129712	WT	KO2	OK	2.62961	5.13737	0.966182	2.66417	5e-05	0.000490444	yes
PRSS27	PRSS27	PRSS27	chr16:2712417-2720551	WT	KO2	OK	1.19314	2.32798	0.964313	2.35667	0.0001	0.000919048	yes
CALB2	CALB2	CALB2	chr16:71358712-71390438	WT	KO2	OK	9.86327	19.2433	0.964216	3.68105	5e-05	0.000490444	yes
SLC2A1	SLC2A1	SLC2A1	chr1:42925374-42983358	WT	KO2	OK	63.2677	123.222	0.961715	4.22751	5e-05	0.000490444	yes
EPHA10	EPHA10	EPHA10	chr1:37715973-37765152	WT	KO2	OK	0.581989	1.1333	0.96147	2.37097	5e-05	0.000490444	yes
GNE	GNE	GNE	chr9:36214440-36277056	WT	KO2	OK	23.2395	45.183	0.959201	4.185	5e-05	0.000490444	yes
DIO2	DIO2	DIO2	chr14:80197524-80455467	WT	KO2	OK	0.692132	1.34416	0.957584	3.05743	5e-05	0.000490444	yes
ATP1B1	ATP1B1	ATP1B1	chr1:169106708-169460669	WT	KO2	OK	135.169	262.39	0.956952	3.4394	5e-05	0.000490444	yes
MAP2K6	MAP2K6	MAP2K6	chr17:69414696-69542329	WT	KO2	OK	9.99573	19.3712	0.954531	3.77041	5e-05	0.000490444	yes
MAML2	MAML2	MAML2	chr11:95976592-96343180	WT	KO2	OK	1.74735	3.38441	0.953732	3.64257	5e-05	0.000490444	yes
TBX1	TBX1	TBX1	chr22:19756702-19783589	WT	KO2	OK	0.538521	1.0413	0.951307	1.91461	0.00045	0.00342385	yes
PXMP2	PXMP2	PXMP2	chr12:132687605-132704991	WT	KO2	OK	7.83839	15.1368	0.949428	3.27512	5e-05	0.000490444	yes
FSTL4	FSTL4	FSTL4	chr5:133196459-133612532	WT	KO2	OK	1.20374	2.32294	0.948431	3.26874	5e-05	0.000490444	yes
UBA7	UBA7	UBA7	chr3:49805204-49813958	WT	KO2	OK	13.8387	26.6957	0.947906	4.02805	5e-05	0.000490444	yes
SPRY1	SPRY1	SPRY1	chr4:123396794-123403760	WT	KO2	OK	3.05442	5.88123	0.945217	3.30568	5e-05	0.000490444	yes
PDP1	PDP1	PDP1	chr8:93916854-93926068	WT	KO2	OK	7.13635	13.7329	0.944374	3.89963	5e-05	0.000490444	yes
SPDEF	SPDEF	SPDEF	chr6:34537801-34556333	WT	KO2	OK	1.99962	3.83518	0.939568	2.89679	5e-05	0.000490444	yes
ZNF239	ZNF239	ZNF239	chr10:43556344-43574618	WT	KO2	OK	1.17189	2.24072	0.935118	2.50253	5e-05	0.000490444	yes
ANXA8	ANXA8	ANXA8	chr10:47467993-47484158	WT	KO2	OK	1.08013	2.06468	0.93471	2.51394	5e-05	0.000490444	yes
IFITM2	IFITM2	IFITM2	chr11:308106-309410	WT	KO2	OK	368.671	704.541	0.934348	4.09108	5e-05	0.000490444	yes
RN7SK	RN7SK	RN7SK	chr6:52995619-52995951	WT	KO2	OK	35.5893	67.9901	0.933883	2.85246	5e-05	0.000490444	yes
ARHGAP18	ARHGAP18	ARHGAP18	chr6:129577094-129710225	WT	KO2	OK	11.0145	21.0364	0.933487	3.92733	5e-05	0.000490444	yes
EFNB2	EFNB2	EFNB2	chr13:106489730-106535040	WT	KO2	OK	2.53651	4.83515	0.930714	3.50277	5e-05	0.000490444	yes
PRRG4	PRRG4	PRRG4	chr11:32829934-32858123	WT	KO2	OK	1.62884	3.10221	0.92945	3.38935	5e-05	0.000490444	yes
UHMK1	UHMK1	UHMK1	chr1:162497173-162529629	WT	KO2	OK	10.263	19.5088	0.926668	3.92005	5e-05	0.000490444	yes
MAST4	MAST4	MAST4	chr5:66596347-67169595	WT	KO2	OK	2.44905	4.65363	0.926137	3.14194	5e-05	0.000490444	yes
C4orf32	C4orf32	C4orf32	chr4:112145396-112189081	WT	KO2	OK	2.22598	4.22938	0.926006	3.10591	5e-05	0.000490444	yes
LGALS3BP	LGALS3BP	LGALS3BP	chr17:78971252-78979979	WT	KO2	OK	568.153	1078.81	0.92509	3.78476	5e-05	0.000490444	yes
LYPD1	LYPD1	LYPD1	chr2:132416573-132671579	WT	KO2	OK	1.54781	2.93646	0.923848	1.53376	0.00955	0.0453915	yes
C2orf66	C2orf66	C2orf66	chr2:196804414-196810276	WT	KO2	OK	0.294253	0.558241	0.923829	1.66741	0.0056	0.0292777	yes
RMRP	RMRP	RMRP	chr9:35657750-35658018	WT	KO2	OK	30.6475	58.1323	0.923569	2.45596	5e-05	0.000490444	yes
CLDN2	CLDN2	CLDN2	chrX:106900062-106930861	WT	KO2	OK	50.6681	96.0903	0.923312	4.02763	5e-05	0.000490444	yes
CRLF2	CRLF2	CRLF2	chrY:1190495-1212723	WT	KO2	OK	7.81554	14.8173	0.922862	3.44674	5e-05	0.000490444	yes
C1QTNF1	C1QTNF1	C1QTNF1	chr17:79019208-79049788	WT	KO2	OK	23.0044	43.5849	0.92192	3.9629	5e-05	0.000490444	yes
KDM5D	KDM5D	KDM5D	chrY:19705414-19744939	WT	KO2	OK	4.13059	7.82304	0.921383	3.74155	5e-05	0.000490444	yes
TUBA1A	TUBA1A	TUBA1A	chr12:49184794-49189324	WT	KO2	OK	51.3411	97.1358	0.919889	4.0254	5e-05	0.000490444	yes
ARHGEF4	ARHGEF4	ARHGEF4	chr2:130916650-131047253	WT	KO2	OK	2.05061	3.87807	0.919285	3.2768	5e-05	0.000490444	yes
IGFBP1	IGFBP1	IGFBP1	chr7:45888359-45893668	WT	KO2	OK	63.5859	120.246	0.919214	3.89638	5e-05	0.000490444	yes
VDR	VDR	VDR	chr12:47841536-47905031	WT	KO2	OK	1.05144	1.98809	0.919023	3.01462	5e-05	0.000490444	yes
ZNF708	ZNF708	ZNF708	chr19:21291159-21329439	WT	KO2	OK	0.350543	0.661859	0.916931	2.14489	0.0003	0.00241675	yes
CXCL3	CXCL3	CXCL3	chr4:74036590-74038773	WT	KO2	OK	10.7248	20.226	0.915264	3.40371	5e-05	0.000490444	yes
TMEM106B	TMEM106B	TMEM106B	chr7:12211221-12237264	WT	KO2	OK	7.25456	13.6664	0.913669	3.82711	5e-05	0.000490444	yes
THSD7A	THSD7A	THSD7A	chr7:11370434-11832198	WT	KO2	OK	2.59582	4.88826	0.913128	3.71202	5e-05	0.000490444	yes
SAT1	SAT1	SAT1	chrX:23783157-23786223	WT	KO2	OK	416.686	784.316	0.912474	3.91464	5e-05	0.000490444	yes
HS3ST1	HS3ST1	HS3ST1	chr4:11398363-11428913	WT	KO2	OK	1.6401	3.08711	0.912473	2.71318	0.00015	0.0013092	yes
MALAT1	MALAT1	MALAT1	chr11:65497761-65506512	WT	KO2	OK	35.3543	66.2436	0.905896	3.80611	5e-05	0.000490444	yes
PIK3R5	PIK3R5	PIK3R5	chr17:8878915-8965712	WT	KO2	OK	0.596394	1.11659	0.904758	2.50566	5e-05	0.000490444	yes
PARD3B	PARD3B	PARD3B	chr2:204545792-205620162	WT	KO2	OK	0.732806	1.37168	0.904441	3.09287	5e-05	0.000490444	yes
CIITA	CIITA	CIITA	chr16:10877197-10924983	WT	KO2	OK	0.2759	0.515188	0.900953	1.75633	0.0012	0.00792463	yes
KCNE4	KCNE4	KCNE4	chr2:223051929-223055637	WT	KO2	OK	0.907736	1.69463	0.900627	2.65491	5e-05	0.000490444	yes
BPIFB1	BPIFB1	BPIFB1	chr20:33283134-33309878	WT	KO2	OK	0.974358	1.81453	0.89707	2.23487	0.0002	0.00168549	yes
MMP2	MMP2	MMP2	chr16:55478829-55506691	WT	KO2	OK	1.5231	2.83163	0.894619	2.88822	5e-05	0.000490444	yes
KCNK1	KCNK1	KCNK1	chr1:233614003-233672512	WT	KO2	OK	24.3997	45.3121	0.893032	3.82232	5e-05	0.000490444	yes
LIPG	LIPG	LIPG	chr18:49562030-49592908	WT	KO2	OK	1.72331	3.19692	0.891503	3.11208	5e-05	0.000490444	yes
KCCAT198	KCCAT198	KCCAT198	chr12:105304866-105327017	WT	KO2	OK	1.60467	2.97672	0.891446	1.53661	0.00915	0.0439322	yes
TUSC1	TUSC1	TUSC1	chr9:25676388-25678858	WT	KO2	OK	1.66123	3.08162	0.891442	2.8116	5e-05	0.000490444	yes
LINC00324	LINC00324	LINC00324	chr17:8220629-8224043	WT	KO2	OK	0.454964	0.843707	0.89099	1.85694	0.00245	0.0146094	yes
LOC440896	LOC440896	LOC440896	chr9:41100984-41107812	WT	KO2	OK	1.63579	3.0285	0.888615	2.8742	5e-05	0.000490444	yes
CCL26	CCL26	CCL26	chr7:75769523-75789746	WT	KO2	OK	5.46535	10.1183	0.888584	2.43593	0.0001	0.000919048	yes
SLC52A3	SLC52A3	SLC52A3	chr20:760079-768584	WT	KO2	OK	0.775367	1.43162	0.884702	2.41064	0.0002	0.00168549	yes
LOC729970	LOC729970	LOC729970	chr1:94928027-94963270	WT	KO2	OK	2.16591	3.99863	0.884536	2.29687	0.00015	0.0013092	yes
EN2	EN2	EN2	chr7:155458128-155464831	WT	KO2	OK	0.393288	0.725795	0.883976	2.14617	0.00055	0.00405196	yes
FAM65B	FAM65B	FAM65B	chr6:24804280-25042168	WT	KO2	OK	0.912547	1.6824	0.882555	2.64501	5e-05	0.000490444	yes
SHROOM3	SHROOM3	SHROOM3	chr4:76435099-76783252	WT	KO2	OK	2.3455	4.32061	0.88134	3.6195	5e-05	0.000490444	yes
INSIG1	INSIG1	INSIG1	chr7:155297775-155310235	WT	KO2	OK	68.7605	126.621	0.880869	3.80811	5e-05	0.000490444	yes
GOLT1A	GOLT1A	GOLT1A	chr1:204198159-204214092	WT	KO2	OK	4.43811	8.17177	0.880703	2.65184	5e-05	0.000490444	yes
ASIC2	ASIC2	ASIC2	chr17:33013087-34156806	WT	KO2	OK	0.307412	0.565858	0.880265	1.66434	0.00385	0.021333	yes
PTGES	PTGES	PTGES	chr9:129738335-129753065	WT	KO2	OK	109.632	201.755	0.879932	3.87683	5e-05	0.000490444	yes
SNX18	SNX18	SNX18	chr5:54517758-54546586	WT	KO2	OK	1.85877	3.42039	0.879809	3.19688	5e-05	0.000490444	yes
LOC730102	LOC730102	LOC730102	chr1:178006139-178038007	WT	KO2	OK	4.33096	7.96951	0.879805	3.33983	5e-05	0.000490444	yes
ZMYND15	ZMYND15	ZMYND15	chr17:4740014-4746119	WT	KO2	OK	1.05171	1.93467	0.879353	2.44296	5e-05	0.000490444	yes
DAAM1	DAAM1	DAAM1	chr14:59188662-59371405	WT	KO2	OK	2.22029	4.07846	0.87728	3.39211	5e-05	0.000490444	yes
NCOA7	NCOA7	NCOA7	chr6:125781160-125932030	WT	KO2	OK	48.8137	89.6632	0.87723	3.7418	5e-05	0.000490444	yes
AP1S3	AP1S3	AP1S3	chr2:223755329-223837602	WT	KO2	OK	6.18921	11.3551	0.875519	3.59302	5e-05	0.000490444	yes
CALHM2	CALHM2	CALHM2	chr10:103446785-103452405	WT	KO2	OK	3.20187	5.87417	0.87547	2.94578	5e-05	0.000490444	yes
TRIM22	TRIM22	TRIM22	chr11:5689586-5710863	WT	KO2	OK	44.9829	82.4072	0.873392	3.76309	5e-05	0.000490444	yes
SPTB	SPTB	SPTB	chr14:64746282-64823148	WT	KO2	OK	0.43095	0.789418	0.87327	2.66344	5e-05	0.000490444	yes
CNTNAP3P2	CNTNAP3P2	CNTNAP3P2	chr9:67059459-67297156	WT	KO2	OK	1.00122	1.83229	0.871892	2.98313	5e-05	0.000490444	yes
HTR7P1	HTR7P1	HTR7P1	chr12:13000441-13004830	WT	KO2	OK	0.658683	1.20379	0.869931	2.54759	5e-05	0.000490444	yes
SIAE	SIAE	SIAE	chr11:124622845-124694791	WT	KO2	OK	4.78051	8.72135	0.867386	1.88255	0.0015	0.00958699	yes
FLJ44635	FLJ44635	FLJ44635	chrX:72144183-72161750	WT	KO2	OK	0.338653	0.617792	0.867312	1.67299	0.0056	0.0292777	yes
CPE	CPE	CPE	chr4:165378941-165498547	WT	KO2	OK	1.13225	2.06514	0.867051	2.55009	5e-05	0.000490444	yes
C1S	C1S	C1S	chr12:7060675-7071031	WT	KO2	OK	162.516	296.155	0.865776	3.74831	5e-05	0.000490444	yes
MMP24	MMP24	MMP24	chr20:35226735-35278157	WT	KO2	OK	2.61929	4.76851	0.86436	1.78032	0.00225	0.0136424	yes
CPPED1	CPPED1	CPPED1	chr16:12659798-12803887	WT	KO2	OK	11.272	20.5184	0.864169	3.77087	5e-05	0.000490444	yes
NTNG2	NTNG2	NTNG2	chr9:132161946-132242833	WT	KO2	OK	1.0645	1.93542	0.862463	2.60018	5e-05	0.000490444	yes
CD99	CD99	CD99	chrY:2691132-2741309	WT	KO2	OK	177.038	320.925	0.858177	3.79354	5e-05	0.000490444	yes
RNF212	RNF212	RNF212	chr4:1071477-1113564	WT	KO2	OK	0.800321	1.45042	0.857823	1.8845	0.00075	0.00527851	yes
SCD5	SCD5	SCD5	chr4:82629536-82798857	WT	KO2	OK	3.28228	5.94589	0.857194	3.12219	5e-05	0.000490444	yes
RNF43	RNF43	RNF43	chr17:58301226-58417582	WT	KO2	OK	4.23193	7.66524	0.857014	1.47646	0.0103	0.0482698	yes
LYPD3	LYPD3	LYPD3	chr19:43460793-43465679	WT	KO2	OK	1.25924	2.28049	0.856788	2.3037	0.0002	0.00168549	yes
LINC01279	LINC01279	LINC01279	chr3:112596793-112601969	WT	KO2	OK	0.981408	1.77688	0.856425	2.83741	5e-05	0.000490444	yes
CHST2	CHST2	CHST2	chr3:143119775-143124014	WT	KO2	OK	0.418568	0.757754	0.856267	2.23506	0.0002	0.00168549	yes
GLUL	GLUL	GLUL	chr1:182378092-182392206	WT	KO2	OK	8.66148	15.6587	0.854276	3.69192	5e-05	0.000490444	yes
TNFSF9	TNFSF9	TNFSF9	chr19:6530998-6535928	WT	KO2	OK	11.6717	21.0969	0.854019	3.39438	5e-05	0.000490444	yes
FAM3C	FAM3C	FAM3C	chr7:121348850-121396368	WT	KO2	OK	36.7995	66.4815	0.853269	3.71102	5e-05	0.000490444	yes
SGK1	SGK1	SGK1	chr6:134169245-134318058	WT	KO2	OK	18.2422	32.9162	0.851517	3.60047	5e-05	0.000490444	yes
LINC00511	LINC00511	LINC00511	chr17:72598040-72640472	WT	KO2	OK	0.448521	0.808635	0.850315	1.81289	0.0031	0.0178785	yes
LIMCH1	LIMCH1	LIMCH1	chr4:41359606-41700044	WT	KO2	OK	15.9133	28.643	0.847951	3.64345	5e-05	0.000490444	yes
HOXB8	HOXB8	HOXB8	chr17:48612345-48614939	WT	KO2	OK	6.92294	12.4547	0.847233	3.20483	5e-05	0.000490444	yes
MGC70870	MGC70870	MGC70870	chr17_GL000205v2_random:54856-57966	WT	KO2	OK	1.00472	1.80745	0.847161	2.5382	5e-05	0.000490444	yes
MDGA1	MDGA1	MDGA1	chr6:37632507-37697990	WT	KO2	OK	3.21234	5.767	0.844197	3.49995	5e-05	0.000490444	yes
TMEM221	TMEM221	TMEM221	chr19:17435508-17448567	WT	KO2	OK	0.587935	1.05377	0.841836	1.87196	0.00205	0.0125687	yes
CRIP2	CRIP2	CRIP2	chr14:105472937-105480170	WT	KO2	OK	38.936	69.7382	0.840844	3.41263	5e-05	0.000490444	yes
GBP7	GBP7	GBP7	chr1:89131750-89176040	WT	KO2	OK	0.70466	1.26049	0.838981	2.13824	0.0006	0.0043733	yes
CRISPLD2	CRISPLD2	CRISPLD2	chr16:84819980-84909510	WT	KO2	OK	2.11887	3.77682	0.833874	3.07	5e-05	0.000490444	yes
DENND2A	DENND2A	DENND2A	chr7:140518418-140641486	WT	KO2	OK	0.286686	0.50997	0.830942	1.79284	0.0016	0.0101692	yes
SSBP3	SSBP3	SSBP3	chr1:54225430-54406395	WT	KO2	OK	6.04477	10.7486	0.830388	3.28662	5e-05	0.000490444	yes
CNN3	CNN3	CNN3	chr1:94896948-94927223	WT	KO2	OK	49.5957	88.1516	0.829771	3.58902	5e-05	0.000490444	yes
NOS2	NOS2	NOS2	chr17:27756765-27800529	WT	KO2	OK	0.299241	0.531596	0.829023	1.95707	0.00175	0.0109649	yes
SRGAP3	SRGAP3	SRGAP3	chr3:8980590-9249685	WT	KO2	OK	0.400457	0.711259	0.828727	2.54958	5e-05	0.000490444	yes
WNT4	WNT4	WNT4	chr1:22117304-22143026	WT	KO2	OK	0.354685	0.629703	0.828134	1.9959	0.00125	0.00819165	yes
FLJ31662	FLJ31662	FLJ31662	chr1:95474736-95479356	WT	KO2	OK	0.348499	0.618365	0.827301	1.75923	0.00355	0.0199367	yes
GIMAP2	GIMAP2	GIMAP2	chr7:150685705-150693640	WT	KO2	OK	1.99608	3.53013	0.822553	2.34636	5e-05	0.000490444	yes
PDK4	PDK4	PDK4	chr7:95583496-95596613	WT	KO2	OK	13.3256	23.5639	0.822376	3.41976	5e-05	0.000490444	yes
XAF1	XAF1	XAF1	chr17:6755836-6775645	WT	KO2	OK	41.4281	73.191	0.821056	3.54989	5e-05	0.000490444	yes
SH3TC1	SH3TC1	SH3TC1	chr4:8199243-8241103	WT	KO2	OK	4.34587	7.67641	0.820787	3.27314	5e-05	0.000490444	yes
ALX4	ALX4	ALX4	chr11:44260727-44310166	WT	KO2	OK	0.572424	1.01057	0.820009	2.45613	5e-05	0.000490444	yes
MTHFD2L	MTHFD2L	MTHFD2L	chr4:74158111-74303097	WT	KO2	OK	1.00426	1.77244	0.819603	2.30216	0.00015	0.0013092	yes
RBMXL1	RBMXL1	RBMXL1	chr1:88935772-88992960	WT	KO2	OK	2.46216	4.34085	0.818057	1.98482	0.0008	0.00558451	yes
CP	CP	CP	chr3:149129583-149222045	WT	KO2	OK	31.525	55.5479	0.817235	2.58324	5e-05	0.000490444	yes
C1orf116	C1orf116	C1orf116	chr1:207018520-207032756	WT	KO2	OK	1.01821	1.79346	0.816713	2.69501	5e-05	0.000490444	yes
TMTC2	TMTC2	TMTC2	chr12:82687154-83134868	WT	KO2	OK	3.04592	5.36325	0.81623	2.72518	5e-05	0.000490444	yes
ANTXR2	ANTXR2	ANTXR2	chr4:79901616-80073472	WT	KO2	OK	2.21786	3.90257	0.815254	2.42195	5e-05	0.000490444	yes
DAB2IP	DAB2IP	DAB2IP	chr9:121567101-121785530	WT	KO2	OK	12.7467	22.427	0.815112	3.47156	5e-05	0.000490444	yes
CHP1	CHP1	CHP1	chr15:41231238-41281885	WT	KO2	OK	76.4336	134.45	0.814788	3.57439	5e-05	0.000490444	yes
DAPK1	DAPK1	DAPK1	chr9:87497227-87708634	WT	KO2	OK	30.5184	53.6322	0.813419	3.57521	5e-05	0.000490444	yes
SLC18A2	SLC18A2	SLC18A2	chr10:117241072-117279430	WT	KO2	OK	3.84192	6.74346	0.811662	3.04263	5e-05	0.000490444	yes
GBP4	GBP4	GBP4	chr1:89181147-89198950	WT	KO2	OK	16.0308	28.1084	0.810154	3.55238	5e-05	0.000490444	yes
MCU	MCU	MCU	chr10:72692130-72887694	WT	KO2	OK	33.3738	58.4972	0.809654	3.53858	5e-05	0.000490444	yes
TJP3	TJP3	TJP3	chr19:3708336-3761675	WT	KO2	OK	3.35207	5.87331	0.809125	2.12816	0.0005	0.00374194	yes
AXIN2	AXIN2	AXIN2	chr17:65528564-65561622	WT	KO2	OK	5.7782	10.1186	0.808322	3.25908	5e-05	0.000490444	yes
BTN3A3	BTN3A3	BTN3A3	chr6:26440471-26453415	WT	KO2	OK	8.96897	15.703	0.808026	3.20045	5e-05	0.000490444	yes
FMO5	FMO5	FMO5	chr1:147184304-147225638	WT	KO2	OK	0.40357	0.706207	0.80727	1.60233	0.00535	0.0281641	yes
NHS	NHS	NHS	chrX:17375419-17735993	WT	KO2	OK	1.85364	3.24352	0.8072	3.11265	5e-05	0.000490444	yes
AKAP2	AKAP2	AKAP2	chr9:109640787-110172511	WT	KO2	OK	10.7554	18.7939	0.805206	3.47567	5e-05	0.000490444	yes
TOR1B	TOR1B	TOR1B	chr9:129803142-129811289	WT	KO2	OK	19.9743	34.8427	0.802713	3.38507	5e-05	0.000490444	yes
TPPP	TPPP	TPPP	chr5:659861-693395	WT	KO2	OK	2.68415	4.68104	0.802366	3.15136	5e-05	0.000490444	yes
PLOD2	PLOD2	PLOD2	chr3:146069440-146161495	WT	KO2	OK	66.0022	115.063	0.801836	3.47108	5e-05	0.000490444	yes
GLCCI1	GLCCI1	GLCCI1	chr7:7949838-8089079	WT	KO2	OK	1.45331	2.53265	0.801309	2.7819	5e-05	0.000490444	yes
SOD2	SOD2	SOD2	chr6:159679063-159789703	WT	KO2	OK	205.66	358.22	0.800588	1.91357	0.0007	0.00498809	yes
ACKR1	ACKR1	ACKR1	chr1:159204012-159206500	WT	KO2	OK	4.44231	7.73713	0.80049	2.46483	5e-05	0.000490444	yes
COL21A1	COL21A1	COL21A1	chr6:56056589-56394128	WT	KO2	OK	0.818034	1.42419	0.799909	2.11552	0.0001	0.000919048	yes
STARD4	STARD4	STARD4	chr5:111496034-112017306	WT	KO2	OK	31.0678	54.0844	0.799793	2.72061	5e-05	0.000490444	yes
TMEM158	TMEM158	TMEM158	chr3:45224463-45226322	WT	KO2	OK	4.45795	7.75427	0.798613	2.84335	5e-05	0.000490444	yes
ERN1	ERN1	ERN1	chr17:64043029-64130142	WT	KO2	OK	1.73366	3.01555	0.798597	2.77768	5e-05	0.000490444	yes
SELPLG	SELPLG	SELPLG	chr12:108621903-108633894	WT	KO2	OK	0.915963	1.59309	0.798466	2.18687	0.0003	0.00241675	yes
ZDHHC14	ZDHHC14	ZDHHC14	chr6:157381524-157673945	WT	KO2	OK	1.20366	2.09207	0.797506	2.38905	5e-05	0.000490444	yes
TGFBR3	TGFBR3	TGFBR3	chr1:91680342-91906002	WT	KO2	OK	3.80333	6.61003	0.797395	3.20005	5e-05	0.000490444	yes
PYROXD2	PYROXD2	PYROXD2	chr10:98383564-98415221	WT	KO2	OK	3.9476	6.84642	0.794375	2.82011	5e-05	0.000490444	yes
DDO	DDO	DDO	chr6:110392179-110415550	WT	KO2	OK	0.570039	0.987962	0.793395	1.47392	0.0089	0.0429576	yes
F3	F3	F3	chr1:94529175-94541857	WT	KO2	OK	1.6764	2.90057	0.790973	2.45973	5e-05	0.000490444	yes
STEAP2	STEAP2	STEAP2	chr7:90211685-90237678	WT	KO2	OK	3.59939	6.2237	0.790018	2.34958	5e-05	0.000490444	yes
CD74	CD74	CD74	chr5:150401636-150412936	WT	KO2	OK	4.93255	8.52858	0.789971	2.62381	5e-05	0.000490444	yes
KIAA1614	KIAA1614	KIAA1614	chr1:180913176-180946103	WT	KO2	OK	0.597713	1.03344	0.789933	2.24239	5e-05	0.000490444	yes
TLR3	TLR3	TLR3	chr4:186069154-186085098	WT	KO2	OK	5.51191	9.53004	0.789929	3.04939	5e-05	0.000490444	yes
RNF145	RNF145	RNF145	chr5:159157408-159210053	WT	KO2	OK	53.2479	92.0373	0.789494	3.47738	5e-05	0.000490444	yes
CADM1	CADM1	CADM1	chr11:115173624-115504523	WT	KO2	OK	6.36007	10.9844	0.788348	3.23759	5e-05	0.000490444	yes
BRIP1	BRIP1	BRIP1	chr17:61679185-61863559	WT	KO2	OK	3.30669	5.7106	0.788255	3.21431	5e-05	0.000490444	yes
LOC90768	LOC90768	LOC90768	chr4:182138659-182144515	WT	KO2	OK	0.323461	0.557602	0.785643	1.90492	0.00105	0.00705301	yes
PI3	PI3	PI3	chr20:45174898-45176544	WT	KO2	OK	6.2421	10.7566	0.785117	2.16469	0.0002	0.00168549	yes
TGFBR2	TGFBR2	TGFBR2	chr3:30606501-30694141	WT	KO2	OK	59.2233	101.747	0.780742	3.44756	5e-05	0.000490444	yes
SLCO4C1	SLCO4C1	SLCO4C1	chr5:102233985-102296549	WT	KO2	OK	0.310995	0.534151	0.780358	1.97607	0.00125	0.00819165	yes
HIP1	HIP1	HIP1	chr7:75533297-75738972	WT	KO2	OK	7.28078	12.4808	0.777543	3.36877	5e-05	0.000490444	yes
SOX9	SOX9	SOX9	chr17:72121019-72126419	WT	KO2	OK	9.10233	15.6008	0.777308	3.23111	5e-05	0.000490444	yes
FCMR	FCMR	FCMR	chr1:206897442-206922033	WT	KO2	OK	0.79547	1.36284	0.77674	2.03772	0.00075	0.00527851	yes
TMEM92	TMEM92	TMEM92	chr17:50271405-50281485	WT	KO2	OK	10.4011	17.8094	0.775899	3.19803	5e-05	0.000490444	yes
LGALS3	LGALS3	LGALS3	chr14:55129216-55145430	WT	KO2	OK	93.6294	160.316	0.775887	3.34613	5e-05	0.000490444	yes
SLC23A2	SLC23A2	SLC23A2	chr20:4852355-5010293	WT	KO2	OK	17.2527	29.4952	0.773663	3.38232	5e-05	0.000490444	yes
CASC8	CASC8	CASC8	chr8:127244636-127482139	WT	KO2	OK	1.63354	2.79156	0.773067	2.11628	0.0005	0.00374194	yes
PIK3C2A	PIK3C2A	PIK3C2A	chr11:17086575-17207996	WT	KO2	OK	8.9951	15.3662	0.772554	3.25152	5e-05	0.000490444	yes
SNHG9	SNHG9	SNHG9	chr16:1964995-1965504	WT	KO2	OK	47.7079	81.4562	0.771796	2.15336	0.00025	0.00205504	yes
CAPN3	CAPN3	CAPN3	chr15:42359499-42412317	WT	KO2	OK	1.82464	3.11385	0.771087	1.9075	0.00095	0.00648299	yes
ANXA8L1	ANXA8L1	ANXA8L1	chr10:46375589-46391783	WT	KO2	OK	5.66476	9.66335	0.770509	2.84965	5e-05	0.000490444	yes
C9orf16	C9orf16	C9orf16	chr9:128160259-128163928	WT	KO2	OK	39.439	67.2286	0.769453	3.08624	5e-05	0.000490444	yes
SLC9A3R2	SLC9A3R2	SLC9A3R2	chr16:2026867-2039026	WT	KO2	OK	34.369	58.5722	0.769108	3.29989	5e-05	0.000490444	yes
NPY4R	NPY4R	NPY4R	chr10:47918738-47923524	WT	KO2	OK	1.66304	2.8277	0.765806	2.26906	5e-05	0.000490444	yes
ITGA2	ITGA2	ITGA2	chr5:52989325-53094779	WT	KO2	OK	15.5659	26.4546	0.76513	3.3275	5e-05	0.000490444	yes
SCG2	SCG2	SCG2	chr2:223596939-223602499	WT	KO2	OK	0.723617	1.2279	0.762891	1.98351	0.00105	0.00705301	yes
NFE2	NFE2	NFE2	chr12:54292106-54301037	WT	KO2	OK	0.576893	0.978847	0.762779	1.44893	0.0083	0.0405617	yes
FKBP9P1	FKBP9P1	FKBP9P1	chr7:55681073-55704567	WT	KO2	OK	0.388989	0.659462	0.761562	1.42853	0.0101	0.0475113	yes
FLJ32255	FLJ32255	FLJ32255	chr5:42985398-42993333	WT	KO2	OK	6.26943	10.626	0.761193	2.9907	5e-05	0.000490444	yes
AGBL2	AGBL2	AGBL2	chr11:47659590-47715376	WT	KO2	OK	0.79847	1.35157	0.759323	2.21392	0.0001	0.000919048	yes
MAPK8IP1	MAPK8IP1	MAPK8IP1	chr11:45885495-45906465	WT	KO2	OK	1.35247	2.2875	0.758175	2.40518	0.00015	0.0013092	yes
ALDH3A1	ALDH3A1	ALDH3A1	chr17:19737984-19748433	WT	KO2	OK	482.396	815.843	0.758074	3.186	5e-05	0.000490444	yes
MUC3A	MUC3A	MUC3A	chr7:100949419-100968346	WT	KO2	OK	0.719294	1.21353	0.754562	2.71405	5e-05	0.000490444	yes
SPIN2B	SPIN2B	SPIN2B	chrX:57119681-57121556	WT	KO2	OK	0.970838	1.63747	0.754163	1.43389	0.00815	0.0399998	yes
HSD11B2	HSD11B2	HSD11B2	chr16:67431132-67437551	WT	KO2	OK	0.733491	1.23595	0.75277	1.751	0.00325	0.0185639	yes
PRKD1	PRKD1	PRKD1	chr14:29576480-29927693	WT	KO2	OK	3.56211	5.99862	0.751898	2.88094	5e-05	0.000490444	yes
LOXL2	LOXL2	LOXL2	chr8:23296896-23404209	WT	KO2	OK	34.1849	57.5377	0.751148	3.27431	5e-05	0.000490444	yes
AKIP1	AKIP1	AKIP1	chr11:8911153-8933006	WT	KO2	OK	17.2106	28.8902	0.747284	2.9865	5e-05	0.000490444	yes
ZNF92	ZNF92	ZNF92	chr7:65373798-65401135	WT	KO2	OK	2.07174	3.4755	0.746378	2.53041	5e-05	0.000490444	yes
CAMTA1	CAMTA1	CAMTA1	chr1:6785323-7769706	WT	KO2	OK	26.2979	44.0989	0.745794	2.84144	5e-05	0.000490444	yes
ARFGEF3	ARFGEF3	ARFGEF3	chr6:138161915-138344663	WT	KO2	OK	0.85628	1.43562	0.74552	2.77602	5e-05	0.000490444	yes
SLC2A12	SLC2A12	SLC2A12	chr6:133987580-134052651	WT	KO2	OK	1.85006	3.1004	0.744884	2.74303	5e-05	0.000490444	yes
MT2A	MT2A	MT2A	chr16:56608565-56609497	WT	KO2	OK	1258.75	2109.42	0.744858	3.27087	5e-05	0.000490444	yes
RRAGD	RRAGD	RRAGD	chr6:89364615-89412276	WT	KO2	OK	1.79521	3.00707	0.744207	2.69739	5e-05	0.000490444	yes
PCSK5	PCSK5	PCSK5	chr9:75890643-76362339	WT	KO2	OK	1.31362	2.1982	0.742773	2.57513	5e-05	0.000490444	yes
FAM84B	FAM84B	FAM84B	chr8:126552437-126558466	WT	KO2	OK	3.25222	5.43996	0.742169	2.89759	5e-05	0.000490444	yes
ZMAT4	ZMAT4	ZMAT4	chr8:40530590-40897824	WT	KO2	OK	0.444121	0.742571	0.741576	1.59892	0.0073	0.0364548	yes
LOC171391	LOC171391	LOC171391	chr11:777577-784284	WT	KO2	OK	4.17009	6.97169	0.741429	1.9832	0.0005	0.00374194	yes
IGFBP3	IGFBP3	IGFBP3	chr7:45912244-45921272	WT	KO2	OK	136.053	227.399	0.74106	3.04176	5e-05	0.000490444	yes
LSR	LSR	LSR	chr19:35248655-35267964	WT	KO2	OK	20.2006	33.7627	0.741031	3.15861	5e-05	0.000490444	yes
SDR16C5	SDR16C5	SDR16C5	chr8:56299647-56320776	WT	KO2	OK	1.23767	2.06719	0.740046	2.34885	5e-05	0.000490444	yes
C11orf91	C11orf91	C11orf91	chr11:33698107-33700740	WT	KO2	OK	1.41862	2.36903	0.739807	1.60762	0.0058	0.0301508	yes
HOXC13	HOXC13	HOXC13	chr12:53935327-53946544	WT	KO2	OK	3.51341	5.86699	0.73975	2.57447	5e-05	0.000490444	yes
IFI30	IFI30	IFI30	chr19:18173779-18178124	WT	KO2	OK	105.267	175.771	0.739635	3.22739	5e-05	0.000490444	yes
EDNRA	EDNRA	EDNRA	chr4:147480916-147544954	WT	KO2	OK	0.444448	0.742071	0.739544	1.79403	0.00115	0.00763491	yes
CLUHP3	CLUHP3	CLUHP3	chr16:31700612-31707424	WT	KO2	OK	1.77083	2.9558	0.739122	2.17535	0.0002	0.00168549	yes
SLC12A2	SLC12A2	SLC12A2	chr5:128083790-128189688	WT	KO2	OK	16.2177	27.0665	0.738941	3.17208	5e-05	0.000490444	yes
PHEX	PHEX	PHEX	chrX:22032443-23293146	WT	KO2	OK	0.491173	0.819692	0.738851	2.11458	0.00045	0.00342385	yes
STEAP1	STEAP1	STEAP1	chr7:89882352-90211635	WT	KO2	OK	15.89	26.5106	0.738452	2.90672	5e-05	0.000490444	yes
SPTBN2	SPTBN2	SPTBN2	chr11:66685248-66721399	WT	KO2	OK	1.48528	2.4769	0.737803	2.78541	5e-05	0.000490444	yes
L1CAM	L1CAM	L1CAM	chrX:153861513-153888973	WT	KO2	OK	4.85798	8.09349	0.736407	2.99092	5e-05	0.000490444	yes
ASPHD2	ASPHD2	ASPHD2	chr22:26429313-26445012	WT	KO2	OK	1.5644	2.60504	0.735699	2.41886	5e-05	0.000490444	yes
TM4SF18	TM4SF18	TM4SF18	chr3:149318497-149333761	WT	KO2	OK	12.3967	20.6047	0.733013	3.11162	5e-05	0.000490444	yes
OAF	OAF	OAF	chr11:120211038-120229941	WT	KO2	OK	12.6169	20.9404	0.730931	2.96444	5e-05	0.000490444	yes
SH3BGRL	SH3BGRL	SH3BGRL	chrX:81113700-81298547	WT	KO2	OK	25.16	41.758	0.730923	2.97174	5e-05	0.000490444	yes
CPEB2	CPEB2	CPEB2	chr4:15002673-15446167	WT	KO2	OK	6.39174	10.6075	0.73081	2.98657	5e-05	0.000490444	yes
SEPT4	SEPT4	SEPT4	chr17:58519836-58692055	WT	KO2	OK	5.74385	9.52322	0.729432	2.53523	5e-05	0.000490444	yes
MCUB	MCUB	MCUB	chr4:109560198-109687716	WT	KO2	OK	18.5222	30.6991	0.72894	2.91464	5e-05	0.000490444	yes
AGTR1	AGTR1	AGTR1	chr3:148697870-148743003	WT	KO2	OK	0.921768	1.52748	0.728679	1.78718	0.0007	0.00498809	yes
PDIK1L	PDIK1L	PDIK1L	chr1:26111164-26125548	WT	KO2	OK	1.29201	2.14096	0.728642	2.40437	5e-05	0.000490444	yes
FEM1C	FEM1C	FEM1C	chr5:115520910-115544894	WT	KO2	OK	4.25245	7.04177	0.727644	2.95734	5e-05	0.000490444	yes
NEIL1	NEIL1	NEIL1	chr15:75346989-75355251	WT	KO2	OK	1.25323	2.07349	0.726417	1.99395	0.0009	0.00618801	yes
IGFBP7	IGFBP7	IGFBP7	chr4:56978639-57205299	WT	KO2	OK	52.9945	87.6793	0.726392	1.64755	0.0053	0.0279653	yes
STMN1	STMN1	STMN1	chr1:25884185-25906877	WT	KO2	OK	55.1746	91.21	0.725188	3.1592	5e-05	0.000490444	yes
ALPK2	ALPK2	ALPK2	chr18:58481249-58628957	WT	KO2	OK	10.6656	17.6299	0.725068	3.14551	5e-05	0.000490444	yes
LINC00920	LINC00920	LINC00920	chr16:66408523-66410900	WT	KO2	OK	3.10015	5.12155	0.724243	2.03432	0.0007	0.00498809	yes
NCEH1	NCEH1	NCEH1	chr3:172630644-172711218	WT	KO2	OK	21.0004	34.66	0.722858	3.15939	5e-05	0.000490444	yes
CD59	CD59	CD59	chr11:33703009-33736479	WT	KO2	OK	41.9667	69.1561	0.720611	3.14258	5e-05	0.000490444	yes
RALGAPA2	RALGAPA2	RALGAPA2	chr20:20389627-20712623	WT	KO2	OK	1.2789	2.10699	0.720275	2.71747	5e-05	0.000490444	yes
ITM2B	ITM2B	ITM2B	chr13:48233137-48262096	WT	KO2	OK	149.47	246.174	0.719819	3.10328	5e-05	0.000490444	yes
GRIP1	GRIP1	GRIP1	chr12:66347430-66679145	WT	KO2	OK	0.761607	1.25433	0.719803	2.2448	0.00015	0.0013092	yes
HIST1H2AC	HIST1H2AC	HIST1H2AC	chr6:26124144-26124690	WT	KO2	OK	11.1937	18.4305	0.719416	2.24652	0.0001	0.000919048	yes
RET	RET	RET	chr10:43077068-43130349	WT	KO2	OK	0.972091	1.5996	0.718543	2.30471	5e-05	0.000490444	yes
SYT1	SYT1	SYT1	chr12:78863992-79452008	WT	KO2	OK	16.3071	26.833	0.718503	3.11965	5e-05	0.000490444	yes
C9orf116	C9orf116	C9orf116	chr9:135495179-135499915	WT	KO2	OK	4.58891	7.54975	0.718279	1.99393	0.00075	0.00527851	yes
MALT1	MALT1	MALT1	chr18:58670008-58750139	WT	KO2	OK	10.2496	16.8598	0.71802	3.08891	5e-05	0.000490444	yes
FLYWCH2	FLYWCH2	FLYWCH2	chr16:2883194-2899382	WT	KO2	OK	18.5113	30.4332	0.717244	2.76468	5e-05	0.000490444	yes
ANKRD50	ANKRD50	ANKRD50	chr4:124664048-124712732	WT	KO2	OK	2.52098	4.14445	0.717198	2.85322	5e-05	0.000490444	yes
LMO4	LMO4	LMO4	chr1:87328467-87348923	WT	KO2	OK	4.95049	8.13578	0.716709	2.94818	5e-05	0.000490444	yes
C12orf76	C12orf76	C12orf76	chr12:110041176-110067695	WT	KO2	OK	1.94684	3.19591	0.715091	2.18216	0.00035	0.00277389	yes
PTER	PTER	PTER	chr10:16436942-16522005	WT	KO2	OK	11.3684	18.6617	0.71506	2.94566	5e-05	0.000490444	yes
ZXDA	ZXDA	ZXDA	chrX:57905429-57910633	WT	KO2	OK	0.472099	0.774963	0.715037	2.02022	0.00055	0.00405196	yes
HAS2	HAS2	HAS2	chr8:121613030-121645324	WT	KO2	OK	3.14542	5.15889	0.713806	2.51345	5e-05	0.000490444	yes
PYCARD	PYCARD	PYCARD	chr16:31201485-31203452	WT	KO2	OK	18.5632	30.4265	0.712889	2.38093	5e-05	0.000490444	yes
SMARCD3	SMARCD3	SMARCD3	chr7:151238972-151277145	WT	KO2	OK	6.28946	10.3014	0.711834	2.60566	5e-05	0.000490444	yes
ANKRD1	ANKRD1	ANKRD1	chr10:90912099-90921275	WT	KO2	OK	3.13235	5.12824	0.71122	2.35762	5e-05	0.000490444	yes
NEURL1B	NEURL1B	NEURL1B	chr5:172641265-172691530	WT	KO2	OK	0.300917	0.492439	0.710581	1.79147	0.00175	0.0109649	yes
PAPPA-AS1	PAPPA-AS1	PAPPA-AS1	chr9:116153791-116402321	WT	KO2	OK	23.8722	39.0474	0.709892	1.7567	0.002	0.0123228	yes
XKR9	XKR9	XKR9	chr8:70669364-70735942	WT	KO2	OK	0.530546	0.866389	0.707537	1.68837	0.00215	0.0131231	yes
PPP1R9A	PPP1R9A	PPP1R9A	chr7:94907636-95296421	WT	KO2	OK	1.91414	3.1225	0.70601	2.77351	5e-05	0.000490444	yes
ZNF165	ZNF165	ZNF165	chr6:28080703-28089562	WT	KO2	OK	1.04254	1.70047	0.705833	1.97016	0.0006	0.0043733	yes
GSTK1	GSTK1	GSTK1	chr7:143255298-143288049	WT	KO2	OK	148.089	241.502	0.705576	3.07512	5e-05	0.000490444	yes
TP53INP1	TP53INP1	TP53INP1	chr8:94925971-94949387	WT	KO2	OK	2.36137	3.84974	0.705135	2.65923	5e-05	0.000490444	yes
HOXC10	HOXC10	HOXC10	chr12:53983950-53990278	WT	KO2	OK	0.943099	1.53751	0.70511	1.81721	0.00245	0.0146094	yes
RAB27A	RAB27A	RAB27A	chr15:55202965-55289815	WT	KO2	OK	6.13224	9.9933	0.704546	2.81791	5e-05	0.000490444	yes
SRD5A3	SRD5A3	SRD5A3	chr4:55346220-55385580	WT	KO2	OK	1.76807	2.879	0.703395	2.4247	5e-05	0.000490444	yes
CCDC80	CCDC80	CCDC80	chr3:112604385-112641143	WT	KO2	OK	15.9351	25.9017	0.700841	3.02567	5e-05	0.000490444	yes
RPS6KA5	RPS6KA5	RPS6KA5	chr14:90868121-91060649	WT	KO2	OK	4.27274	6.94282	0.700362	2.3184	0.0001	0.000919048	yes
PITPNM3	PITPNM3	PITPNM3	chr17:6451262-6556557	WT	KO2	OK	0.487005	0.791194	0.700095	2.09233	0.00055	0.00405196	yes
TNFRSF21	TNFRSF21	TNFRSF21	chr6:47231526-47309947	WT	KO2	OK	29.541	47.9829	0.699802	3.06071	5e-05	0.000490444	yes
TACC1	TACC1	TACC1	chr8:38728185-38853028	WT	KO2	OK	13.1385	21.3383	0.699642	2.95856	5e-05	0.000490444	yes
IL3RA	IL3RA	IL3RA	chrY:1336615-1382689	WT	KO2	OK	4.15082	6.71611	0.69423	2.36269	0.00015	0.0013092	yes
GOLGA8A	GOLGA8A	GOLGA8A	chr15:34379068-34437466	WT	KO2	OK	0.877359	1.41882	0.693455	1.96629	0.0007	0.00498809	yes
RNF217	RNF217	RNF217	chr6:124908245-125092634	WT	KO2	OK	2.00788	3.24654	0.693234	2.70845	5e-05	0.000490444	yes
PI4K2B	PI4K2B	PI4K2B	chr4:25234030-25279209	WT	KO2	OK	9.37307	15.144	0.69215	2.8336	5e-05	0.000490444	yes
TMEM171	TMEM171	TMEM171	chr5:73120560-73131817	WT	KO2	OK	7.8206	12.6216	0.690543	2.44086	5e-05	0.000490444	yes
SLC35A5	SLC35A5	SLC35A5	chr3:112562009-112584437	WT	KO2	OK	7.4329	11.9921	0.690088	2.77639	5e-05	0.000490444	yes
ANKRD13A	ANKRD13A	ANKRD13A	chr12:109999429-110039430	WT	KO2	OK	8.55071	13.7905	0.689563	2.86849	5e-05	0.000490444	yes
PODXL	PODXL	PODXL	chr7:131500261-131556617	WT	KO2	OK	15.8043	25.4731	0.688654	3.05384	5e-05	0.000490444	yes
IL1RAP	IL1RAP	IL1RAP	chr3:190514050-190657197	WT	KO2	OK	3.44231	5.5466	0.688226	2.32573	5e-05	0.000490444	yes
CDC42EP3	CDC42EP3	CDC42EP3	chr2:37641881-37672535	WT	KO2	OK	11.8357	19.0672	0.687949	2.95388	5e-05	0.000490444	yes
PRKCI	PRKCI	PRKCI	chr3:170222431-170305982	WT	KO2	OK	7.49641	12.0686	0.686986	2.86827	5e-05	0.000490444	yes
LAP3	LAP3	LAP3	chr4:17577303-17607967	WT	KO2	OK	199.007	320.337	0.686767	2.97364	5e-05	0.000490444	yes
PLEKHA2	PLEKHA2	PLEKHA2	chr8:38901234-38973911	WT	KO2	OK	1.90937	3.07303	0.686562	2.54373	5e-05	0.000490444	yes
DOCK3	DOCK3	DOCK3	chr3:50675240-51384198	WT	KO2	OK	0.326663	0.525648	0.686293	1.9983	0.0003	0.00241675	yes
STRIP2	STRIP2	STRIP2	chr7:129434432-129488398	WT	KO2	OK	10.5359	16.9529	0.686216	2.67697	5e-05	0.000490444	yes
C2CD4A	C2CD4A	C2CD4A	chr15:62066976-62070917	WT	KO2	OK	0.531323	0.854376	0.685282	1.78297	0.00225	0.0136424	yes
SDCBP	SDCBP	SDCBP	chr8:58553168-58582860	WT	KO2	OK	136.935	219.983	0.683907	2.98114	5e-05	0.000490444	yes
SLC18B1	SLC18B1	SLC18B1	chr6:132769367-132798608	WT	KO2	OK	6.39817	10.2746	0.683351	2.63091	5e-05	0.000490444	yes
GPCPD1	GPCPD1	GPCPD1	chr20:5544433-5611026	WT	KO2	OK	17.6716	28.3765	0.683262	2.96923	5e-05	0.000490444	yes
ZNF548	ZNF548	ZNF548	chr19:57389849-57402551	WT	KO2	OK	0.595265	0.955853	0.683256	1.96947	0.0009	0.00618801	yes
MYL5	MYL5	MYL5	chr4:677921-689441	WT	KO2	OK	9.86664	15.8279	0.681837	1.9227	0.00175	0.0109649	yes
NNT	NNT	NNT	chr5:43573184-43705566	WT	KO2	OK	5.67443	9.10119	0.68158	2.64449	5e-05	0.000490444	yes
CDC42EP2	CDC42EP2	CDC42EP2	chr11:65314817-65322429	WT	KO2	OK	17.5575	28.1549	0.681298	2.85279	5e-05	0.000490444	yes
CD44	CD44	CD44	chr11:35138869-35232402	WT	KO2	OK	210.027	336.556	0.68027	2.81056	5e-05	0.000490444	yes
SCN1B	SCN1B	SCN1B	chr19:35030687-35040449	WT	KO2	OK	6.91317	11.076	0.680018	2.36078	5e-05	0.000490444	yes
BACE2	BACE2	BACE2	chr21:41167800-41282534	WT	KO2	OK	3.45531	5.53286	0.679212	2.82025	5e-05	0.000490444	yes
DEPTOR	DEPTOR	DEPTOR	chr8:119873654-120050918	WT	KO2	OK	1.34697	2.1561	0.678703	2.05602	0.0006	0.0043733	yes
ZBTB20	ZBTB20	ZBTB20	chr3:114314499-115147280	WT	KO2	OK	1.59213	2.54741	0.678077	2.85312	5e-05	0.000490444	yes
KLF6	KLF6	KLF6	chr10:3775995-3785281	WT	KO2	OK	31.8426	50.8814	0.67618	2.95376	5e-05	0.000490444	yes
HRASLS2	HRASLS2	HRASLS2	chr11:63552769-63563383	WT	KO2	OK	35.1106	56.0891	0.675813	2.69993	5e-05	0.000490444	yes
RASSF9	RASSF9	RASSF9	chr12:85804552-85836540	WT	KO2	OK	2.13369	3.40662	0.674992	2.05698	0.0006	0.0043733	yes
MMP9	MMP9	MMP9	chr20:46008907-46016561	WT	KO2	OK	1.06906	1.70627	0.674501	1.77458	0.00275	0.0161315	yes
KATNAL2	KATNAL2	KATNAL2	chr18:46946823-47102243	WT	KO2	OK	0.432104	0.689273	0.673696	1.53651	0.0092	0.0441104	yes
TCEA2	TCEA2	TCEA2	chr20:64057085-64072347	WT	KO2	OK	3.69364	5.8896	0.673126	2.22446	0.0002	0.00168549	yes
KLF5	KLF5	KLF5	chr13:73054975-73077542	WT	KO2	OK	27.8213	44.3177	0.671693	2.83803	5e-05	0.000490444	yes
EEF1A2	EEF1A2	EEF1A2	chr20:63488011-63499315	WT	KO2	OK	33.3225	53.0627	0.671201	2.9022	5e-05	0.000490444	yes
CD81	CD81	CD81	chr11:2328748-2397419	WT	KO2	OK	174.545	277.944	0.671196	2.95534	5e-05	0.000490444	yes
GOLGA8B	GOLGA8B	GOLGA8B	chr15:34525282-34583570	WT	KO2	OK	6.84606	10.8993	0.670886	2.69375	5e-05	0.000490444	yes
RGS2	RGS2	RGS2	chr1:192809038-192812277	WT	KO2	OK	31.4715	50.0871	0.670394	2.83124	5e-05	0.000490444	yes
SIPA1L1	SIPA1L1	SIPA1L1	chr14:71529311-71741229	WT	KO2	OK	3.73111	5.9352	0.669693	2.76459	5e-05	0.000490444	yes
TGM2	TGM2	TGM2	chr20:38127386-38166578	WT	KO2	OK	385.321	612.553	0.668773	2.63559	5e-05	0.000490444	yes
SLC2A8	SLC2A8	SLC2A8	chr9:127397137-127407891	WT	KO2	OK	4.06524	6.4613	0.668484	2.27325	5e-05	0.000490444	yes
PAPPA	PAPPA	PAPPA	chr9:116153791-116402321	WT	KO2	OK	8.94714	14.2091	0.667322	2.26233	0.0002	0.00168549	yes
TMEM62	TMEM62	TMEM62	chr15:43133523-43185143	WT	KO2	OK	10.9779	17.4256	0.666606	2.74419	5e-05	0.000490444	yes
SCN3A	SCN3A	SCN3A	chr2:165087519-165204067	WT	KO2	OK	0.585235	0.928896	0.666501	2.19492	0.0002	0.00168549	yes
ABCD1	ABCD1	ABCD1	chrX:153724867-153744762	WT	KO2	OK	2.37883	3.77546	0.666401	2.40233	5e-05	0.000490444	yes
ABLIM2	ABLIM2	ABLIM2	chr4:7965309-8158832	WT	KO2	OK	0.49706	0.788795	0.666231	1.45462	0.00575	0.0299476	yes
SMAD1	SMAD1	SMAD1	chr4:145481798-145559173	WT	KO2	OK	3.84271	6.08987	0.664287	2.26464	5e-05	0.000490444	yes
C3orf58	C3orf58	C3orf58	chr3:143971797-143992368	WT	KO2	OK	1.76619	2.7964	0.662931	2.06083	0.00055	0.00405196	yes
PEX11B	PEX11B	PEX11B	chr1:145911347-145918924	WT	KO2	OK	14.5672	23.062	0.662794	2.68381	5e-05	0.000490444	yes
LRRC37A3	LRRC37A3	LRRC37A3	chr17:64854311-64919480	WT	KO2	OK	1.32529	2.09607	0.661372	1.94504	0.00075	0.00527851	yes
TRPM6	TRPM6	TRPM6	chr9:74722494-74888094	WT	KO2	OK	0.333021	0.526359	0.660435	1.91473	0.00135	0.0087466	yes
TBL1XR1	TBL1XR1	TBL1XR1	chr3:177019354-177197326	WT	KO2	OK	4.61454	7.29323	0.66037	2.71707	5e-05	0.000490444	yes
PDLIM1	PDLIM1	PDLIM1	chr10:95237567-95291148	WT	KO2	OK	170.313	269.132	0.660124	2.90347	5e-05	0.000490444	yes
FUT8	FUT8	FUT8	chr14:65410591-65744121	WT	KO2	OK	5.1808	8.18615	0.66001	2.64696	5e-05	0.000490444	yes
CD276	CD276	CD276	chr15:73684280-73714518	WT	KO2	OK	29.8351	47.125	0.659482	2.85802	5e-05	0.000490444	yes
B2M	B2M	B2M	chr15_KI270849v1_alt:34835-41507	WT	KO2	OK	169.4	267.566	0.659457	2.86982	5e-05	0.000490444	yes
CEACAM5	CEACAM5	CEACAM5	chr19:41708584-41730421	WT	KO2	OK	1.22013	1.92699	0.659317	1.93348	0.00095	0.00648299	yes
THEMIS2	THEMIS2	THEMIS2	chr1:27872542-27886685	WT	KO2	OK	20.1646	31.844	0.659197	2.44043	5e-05	0.000490444	yes
IGSF1	IGSF1	IGSF1	chrX:131273505-131289429	WT	KO2	OK	1.22701	1.93761	0.659129	2.08285	0.00065	0.0046854	yes
CACNG6	CACNG6	CACNG6	chr19:53991148-54012666	WT	KO2	OK	33.9678	53.6072	0.65826	2.50982	5e-05	0.000490444	yes
RARRES3	RARRES3	RARRES3	chr11:63536800-63546458	WT	KO2	OK	257.086	405.724	0.658244	2.907	5e-05	0.000490444	yes
ITPKA	ITPKA	ITPKA	chr15:41493857-41503559	WT	KO2	OK	1.02819	1.62254	0.658148	1.68127	0.00375	0.0208379	yes
MTMR12	MTMR12	MTMR12	chr5:32227006-32313008	WT	KO2	OK	6.99203	11.0233	0.656772	2.7349	5e-05	0.000490444	yes
SGPP1	SGPP1	SGPP1	chr14:63684215-63728095	WT	KO2	OK	5.1919	8.18472	0.65667	2.51013	0.0001	0.000919048	yes
SAMHD1	SAMHD1	SAMHD1	chr20:36876120-36951843	WT	KO2	OK	51.5838	81.2305	0.655104	2.84575	5e-05	0.000490444	yes
TPK1	TPK1	TPK1	chr7:144451940-144836053	WT	KO2	OK	1.57516	2.47734	0.653287	1.99566	0.00065	0.0046854	yes
PGF	PGF	PGF	chr14:74941829-74955764	WT	KO2	OK	3.51799	5.52686	0.651709	2.16427	0.00015	0.0013092	yes
MIB1	MIB1	MIB1	chr18:21741328-21870957	WT	KO2	OK	2.97799	4.67656	0.651107	2.6428	5e-05	0.000490444	yes
UGCG	UGCG	UGCG	chr9:111896765-111935374	WT	KO2	OK	15.7198	24.6765	0.650557	2.75592	5e-05	0.000490444	yes
IFITM10	IFITM10	IFITM10	chr11_KI270903v1_alt:206155-209175	WT	KO2	OK	0.922653	1.44829	0.650491	1.95444	0.00035	0.00277389	yes
TNFRSF19	TNFRSF19	TNFRSF19	chr13:23570369-23676105	WT	KO2	OK	0.838524	1.31519	0.649346	1.88396	0.001	0.00676357	yes
JPH2	JPH2	JPH2	chr20:44111696-44187578	WT	KO2	OK	0.336077	0.526975	0.648942	1.55713	0.00845	0.0410895	yes
IFIT1	IFIT1	IFIT1	chr10:89392545-89406487	WT	KO2	OK	279.731	438.581	0.648803	2.65664	5e-05	0.000490444	yes
VTN	VTN	VTN	chr17:28367277-28370352	WT	KO2	OK	41.4207	64.9332	0.648604	2.81223	5e-05	0.000490444	yes
CD68	CD68	CD68	chr17:7579486-7590170	WT	KO2	OK	96.7873	151.728	0.648597	2.11842	0.00025	0.00205504	yes
ZNF430	ZNF430	ZNF430	chr19:21020619-21060046	WT	KO2	OK	0.713127	1.11783	0.648471	1.86485	0.00105	0.00705301	yes
PRKCH	PRKCH	PRKCH	chr14:61321442-61550980	WT	KO2	OK	2.76038	4.32619	0.648228	2.3978	0.00015	0.0013092	yes
HEBP1	HEBP1	HEBP1	chr12:12974864-13000309	WT	KO2	OK	33.8492	52.9715	0.646095	2.65458	5e-05	0.000490444	yes
NT5C3A	NT5C3A	NT5C3A	chr7:33014112-33062797	WT	KO2	OK	102.918	160.895	0.644631	2.72308	5e-05	0.000490444	yes
ZNF641	ZNF641	ZNF641	chr12:48340009-48351246	WT	KO2	OK	4.49976	7.0317	0.644026	2.55639	5e-05	0.000490444	yes
ARPC5	ARPC5	ARPC5	chr1:183626192-183635941	WT	KO2	OK	70.108	109.552	0.64396	2.81947	5e-05	0.000490444	yes
TCTN1	TCTN1	TCTN1	chr12:110614026-110689812	WT	KO2	OK	10.0378	15.6781	0.643306	2.43662	5e-05	0.000490444	yes
DYNLT3	DYNLT3	DYNLT3	chrX:37838835-37847636	WT	KO2	OK	10.4717	16.3522	0.64299	2.55361	5e-05	0.000490444	yes
RND3	RND3	RND3	chr2:150468192-150487695	WT	KO2	OK	22.3812	34.9376	0.642493	2.74918	5e-05	0.000490444	yes
IQCK	IQCK	IQCK	chr16:19706351-19858467	WT	KO2	OK	4.51068	7.03164	0.640517	1.53493	0.0061	0.0314124	yes
CELSR2	CELSR2	CELSR2	chr1:109250018-109275756	WT	KO2	OK	2.33893	3.64578	0.640377	2.60648	5e-05	0.000490444	yes
ALDH5A1	ALDH5A1	ALDH5A1	chr6:24494968-24537207	WT	KO2	OK	2.46851	3.84638	0.639862	2.42423	5e-05	0.000490444	yes
THBS1	THBS1	THBS1	chr15:39581078-39598921	WT	KO2	OK	7.94965	12.3861	0.639763	2.76006	5e-05	0.000490444	yes
TNS3	TNS3	TNS3	chr7:47275153-47582144	WT	KO2	OK	30.3321	47.2572	0.639687	2.80073	5e-05	0.000490444	yes
GOLM1	GOLM1	GOLM1	chr9:86026142-86100201	WT	KO2	OK	115.25	179.554	0.639647	2.81068	5e-05	0.000490444	yes
PTTG1IP	PTTG1IP	PTTG1IP	chr21:44849584-44873903	WT	KO2	OK	62.3552	97.1149	0.639182	2.82796	5e-05	0.000490444	yes
MTMR9LP	MTMR9LP	MTMR9LP	chr1:32231659-32241710	WT	KO2	OK	2.96608	4.61949	0.639176	2.18228	0.00025	0.00205504	yes
ZC4H2	ZC4H2	ZC4H2	chrX:64915801-65034744	WT	KO2	OK	1.23791	1.92768	0.638958	1.89418	0.0011	0.00735642	yes
SLCO1B7	SLCO1B7	SLCO1B7	chr12:21015695-21090106	WT	KO2	OK	1.84499	2.87182	0.638353	1.89975	0.001	0.00676357	yes
PPP2R3A	PPP2R3A	PPP2R3A	chr3:135965672-136147910	WT	KO2	OK	0.892046	1.38736	0.637149	2.00139	0.0003	0.00241675	yes
IL6ST	IL6ST	IL6ST	chr5:55935096-55994993	WT	KO2	OK	26.5433	41.28	0.637095	2.73529	5e-05	0.000490444	yes
AGFG2	AGFG2	AGFG2	chr7:100539210-100568220	WT	KO2	OK	7.58396	11.7894	0.636465	2.68059	5e-05	0.000490444	yes
TMSB4X	TMSB4X	TMSB4X	chrX:12975106-12977227	WT	KO2	OK	1635.73	2542.4	0.636258	2.71145	5e-05	0.000490444	yes
TRUB1	TRUB1	TRUB1	chr10:114938192-114977680	WT	KO2	OK	5.69112	8.84302	0.635826	2.50292	5e-05	0.000490444	yes
PDE9A	PDE9A	PDE9A	chr21:42653751-42775508	WT	KO2	OK	3.58947	5.57591	0.635435	2.04775	5e-05	0.000490444	yes
CARD16	CARD16	CARD16	chr11:105041325-105045324	WT	KO2	OK	2.87895	4.47172	0.635289	1.56584	0.00745	0.0370284	yes
CYB5B	CYB5B	CYB5B	chr16:69424594-69466264	WT	KO2	OK	128.936	200.204	0.634812	2.7301	5e-05	0.000490444	yes
ETFBKMT	ETFBKMT	ETFBKMT	chr12:31647159-31669082	WT	KO2	OK	0.700963	1.08832	0.634693	1.4843	0.00705	0.035517	yes
NCR3LG1	NCR3LG1	NCR3LG1	chr11:17351761-17377321	WT	KO2	OK	1.66709	2.58709	0.634005	2.31161	5e-05	0.000490444	yes
IPW	IPW	IPW	chr15:25116544-25122476	WT	KO2	OK	2.50374	3.88507	0.633854	2.36681	0.00015	0.0013092	yes
ENC1	ENC1	ENC1	chr5:74627405-74776912	WT	KO2	OK	25.5082	39.5733	0.633568	1.49904	0.01055	0.0492226	yes
IMMP2L	IMMP2L	IMMP2L	chr7:110663049-111562517	WT	KO2	OK	7.06548	10.9482	0.63183	1.59501	0.00585	0.0303646	yes
ZNF841	ZNF841	ZNF841	chr19:52064465-52095765	WT	KO2	OK	0.580062	0.898734	0.631687	1.7053	0.0032	0.0183471	yes
PLEKHF2	PLEKHF2	PLEKHF2	chr8:95133720-95156685	WT	KO2	OK	5.27535	8.1699	0.631052	2.41941	5e-05	0.000490444	yes
C17orf67	C17orf67	C17orf67	chr17:56791912-56833895	WT	KO2	OK	4.20635	6.51213	0.630559	2.22305	0.0002	0.00168549	yes
PHLDB2	PHLDB2	PHLDB2	chr3:111674675-111976517	WT	KO2	OK	16.5794	25.6509	0.629616	2.71832	5e-05	0.000490444	yes
FBXO4	FBXO4	FBXO4	chr5:41925251-41941570	WT	KO2	OK	5.23664	8.09595	0.62856	2.16341	0.0003	0.00241675	yes
TRAFD1	TRAFD1	TRAFD1	chr12:112125544-112153604	WT	KO2	OK	43.0437	66.5291	0.628182	2.76688	5e-05	0.000490444	yes
ATP8B1	ATP8B1	ATP8B1	chr18:57630301-57803095	WT	KO2	OK	4.63453	7.13877	0.623254	2.52043	5e-05	0.000490444	yes
S100A13	S100A13	S100A13	chr1:153618799-153646306	WT	KO2	OK	247.691	381.493	0.623116	2.08572	0.0004	0.00310726	yes
MORC4	MORC4	MORC4	chrX:106940733-107000244	WT	KO2	OK	37.2947	57.3618	0.62112	2.75212	5e-05	0.000490444	yes
CNTNAP3B	CNTNAP3B	CNTNAP3B	chr9:41891889-42129504	WT	KO2	OK	2.49412	3.83604	0.621087	2.41192	5e-05	0.000490444	yes
ZBED5	ZBED5	ZBED5	chr11:10852703-10858073	WT	KO2	OK	29.4045	45.2201	0.620928	2.69061	5e-05	0.000490444	yes
MXRA7	MXRA7	MXRA7	chr17:76671927-76711005	WT	KO2	OK	23.6328	36.3411	0.620809	2.49182	5e-05	0.000490444	yes
SFR1	SFR1	SFR1	chr10:104122057-104126385	WT	KO2	OK	10.9537	16.8431	0.620739	2.38279	0.0001	0.000919048	yes
ORAI3	ORAI3	ORAI3	chr16:30949083-30954938	WT	KO2	OK	12.5826	19.347	0.620681	2.55019	5e-05	0.000490444	yes
LINC00641	LINC00641	LINC00641	chr14:21200078-21206900	WT	KO2	OK	3.29002	5.05812	0.620506	1.9998	0.0009	0.00618801	yes
RASSF10	RASSF10	RASSF10	chr11:13009422-13012106	WT	KO2	OK	2.31573	3.56011	0.620456	2.08426	0.0004	0.00310726	yes
BACE1	BACE1	BACE1	chr11:117232624-117316256	WT	KO2	OK	3.15914	4.85655	0.620399	1.84276	0.00155	0.00987891	yes
NANOS1	NANOS1	NANOS1	chr10:119029715-119033732	WT	KO2	OK	0.492465	0.756992	0.620257	1.62978	0.0045	0.0242961	yes
MAP2	MAP2	MAP2	chr2:209424046-209734110	WT	KO2	OK	3.95707	6.08006	0.619653	2.34989	0.0001	0.000919048	yes
ACP2	ACP2	ACP2	chr11:47239301-47269033	WT	KO2	OK	27.4905	42.225	0.619164	2.53951	5e-05	0.000490444	yes
PLA2G16	PLA2G16	PLA2G16	chr11:63574470-63614469	WT	KO2	OK	73.09	112.172	0.617968	2.64985	5e-05	0.000490444	yes
BICDL1	BICDL1	BICDL1	chr12:119989843-120094495	WT	KO2	OK	5.5758	8.5569	0.61791	2.42136	0.0001	0.000919048	yes
B3GNT7	B3GNT7	B3GNT7	chr2:231395623-231401164	WT	KO2	OK	2.28696	3.50955	0.617853	2.19893	0.0002	0.00168549	yes
TNRC6C	TNRC6C	TNRC6C	chr17:78004236-78111799	WT	KO2	OK	0.705112	1.08157	0.617203	1.87275	0.00125	0.00819165	yes
VAMP3	VAMP3	VAMP3	chr1:7771268-7781432	WT	KO2	OK	31.4333	48.1779	0.616078	2.66109	5e-05	0.000490444	yes
GAREM1	GAREM1	GAREM1	chr18:32263520-32470484	WT	KO2	OK	1.61699	2.47714	0.615366	2.28741	0.0001	0.000919048	yes
DGKA	DGKA	DGKA	chr12:55931161-55954023	WT	KO2	OK	10.64	16.2922	0.614689	2.50566	5e-05	0.000490444	yes
CYP4V2	CYP4V2	CYP4V2	chr4:186191519-186213463	WT	KO2	OK	2.49535	3.82085	0.614652	2.28712	0.00025	0.00205504	yes
ITGB1	ITGB1	ITGB1	chr10:32900317-32958365	WT	KO2	OK	381.746	583.946	0.613223	2.48188	5e-05	0.000490444	yes
MYO5C	MYO5C	MYO5C	chr15:52120925-52295798	WT	KO2	OK	4.04873	6.19303	0.613175	1.6332	0.00485	0.0259304	yes
YPEL2	YPEL2	YPEL2	chr17:59331691-59401734	WT	KO2	OK	3.32454	5.08402	0.612815	2.40734	5e-05	0.000490444	yes
HSD3B7	HSD3B7	HSD3B7	chr16:30985197-30989152	WT	KO2	OK	23.9443	36.6127	0.612663	2.6312	5e-05	0.000490444	yes
ARID5B	ARID5B	ARID5B	chr10:61901253-62096948	WT	KO2	OK	2.44005	3.73054	0.612473	2.36705	0.0001	0.000919048	yes
TBC1D2	TBC1D2	TBC1D2	chr9:98198997-98255721	WT	KO2	OK	7.48771	11.4472	0.612402	2.30144	0.00015	0.0013092	yes
BACH1	BACH1	BACH1	chr21:29298794-29361896	WT	KO2	OK	8.4064	12.8477	0.611951	2.4865	5e-05	0.000490444	yes
SNORA104	SNORA104	SNORA104	chr19:14619116-14674918	WT	KO2	OK	314.518	480.512	0.611429	1.70961	0.0031	0.0178785	yes
APOBEC3C	APOBEC3C	APOBEC3C	chr22:39014259-39018820	WT	KO2	OK	15.9885	24.4206	0.61107	2.36878	5e-05	0.000490444	yes
TPCN1	TPCN1	TPCN1	chr12:113221437-113298584	WT	KO2	OK	9.53527	14.5625	0.610912	2.61925	5e-05	0.000490444	yes
PKP2	PKP2	PKP2	chr12:32790745-32896846	WT	KO2	OK	2.10219	3.21028	0.610809	2.22093	0.00025	0.00205504	yes
TUBB3	TUBB3	TUBB3	chr16:89922008-89936097	WT	KO2	OK	67.0074	102.276	0.61008	2.69465	5e-05	0.000490444	yes
C15orf48	C15orf48	C15orf48	chr15:45430528-45433449	WT	KO2	OK	69.4867	106.058	0.610041	2.56832	5e-05	0.000490444	yes
ZFHX4	ZFHX4	ZFHX4	chr8:76610878-76867285	WT	KO2	OK	0.387781	0.591643	0.609484	2.01291	0.0007	0.00498809	yes
HMGCS1	HMGCS1	HMGCS1	chr5:43287469-43313512	WT	KO2	OK	76.5091	116.666	0.608683	2.61974	5e-05	0.000490444	yes
BMP4	BMP4	BMP4	chr14:53949735-53956862	WT	KO2	OK	20.5289	31.2929	0.60818	2.54748	5e-05	0.000490444	yes
TBX18	TBX18	TBX18	chr6:84732495-84764236	WT	KO2	OK	8.76219	13.3559	0.608118	2.5877	5e-05	0.000490444	yes
SLFN5	SLFN5	SLFN5	chr17:35243066-35267742	WT	KO2	OK	22.3268	34.031	0.608075	2.63218	5e-05	0.000490444	yes
SYPL1	SYPL1	SYPL1	chr7:106090367-106112647	WT	KO2	OK	42.097	64.1617	0.607995	2.63413	5e-05	0.000490444	yes
TLE4	TLE4	TLE4	chr9:79571772-79726881	WT	KO2	OK	5.60251	8.53495	0.607308	2.48048	5e-05	0.000490444	yes
LINC01355	LINC01355	LINC01355	chr1:23281308-23285518	WT	KO2	OK	0.508823	0.775135	0.607283	1.55312	0.00835	0.0407479	yes
OTUD4	OTUD4	OTUD4	chr4:145133649-145179680	WT	KO2	OK	10.6367	16.1982	0.606792	2.39125	5e-05	0.000490444	yes
SUSD6	SUSD6	SUSD6	chr14:69611592-69715144	WT	KO2	OK	4.01193	6.10894	0.606626	2.44746	5e-05	0.000490444	yes
ADAM10	ADAM10	ADAM10	chr15:58595203-58749978	WT	KO2	OK	45.0488	68.5917	0.606544	2.63842	5e-05	0.000490444	yes
ADGRF4	ADGRF4	ADGRF4	chr6:47698552-47722021	WT	KO2	OK	3.21867	4.89993	0.606296	2.22326	0.0001	0.000919048	yes
ZNF114	ZNF114	ZNF114	chr19:48270098-48287608	WT	KO2	OK	1.8728	2.84987	0.605704	1.88103	0.00125	0.00819165	yes
HIF1A	HIF1A	HIF1A	chr14:61681040-61749089	WT	KO2	OK	103.755	157.846	0.60533	2.29582	5e-05	0.000490444	yes
ZNF704	ZNF704	ZNF704	chr8:80628450-80874781	WT	KO2	OK	1.85507	2.82186	0.605178	2.49176	5e-05	0.000490444	yes
ASAH2B	ASAH2B	ASAH2B	chr10:50739687-50757186	WT	KO2	OK	3.0297	4.60761	0.604846	2.17306	0.0001	0.000919048	yes
COCH	COCH	COCH	chr14:30874534-30890616	WT	KO2	OK	6.18146	9.39854	0.604488	1.7189	0.0029	0.0169101	yes
IDI1	IDI1	IDI1	chr10:1018906-1056716	WT	KO2	OK	68.0634	103.481	0.604421	2.56815	5e-05	0.000490444	yes
MICU3	MICU3	MICU3	chr8:17027237-17122639	WT	KO2	OK	0.828367	1.25884	0.603758	1.76916	0.0025	0.0148494	yes
FAS	FAS	FAS	chr10:88932683-89017061	WT	KO2	OK	10.8529	16.4683	0.601609	2.36395	5e-05	0.000490444	yes
DBP	DBP	DBP	chr19:48630559-48637550	WT	KO2	OK	1.10925	1.68276	0.601237	1.54936	0.00835	0.0407479	yes
HS3ST3B1	HS3ST3B1	HS3ST3B1	chr17:14301049-14349404	WT	KO2	OK	1.32319	2.00712	0.601109	1.96165	0.0007	0.00498809	yes
EGLN1	EGLN1	EGLN1	chr1:231363750-231425044	WT	KO2	OK	12.8147	19.4269	0.600261	2.60608	5e-05	0.000490444	yes
TMEM27	TMEM27	TMEM27	chrX:15627315-15665031	WT	KO2	OK	3.25501	4.93447	0.60023	1.9335	0.00065	0.0046854	yes
WWTR1	WWTR1	WWTR1	chr3:149517234-149703273	WT	KO2	OK	35.7088	54.1158	0.599772	2.61587	5e-05	0.000490444	yes
ELOVL6	ELOVL6	ELOVL6	chr4:110049072-110198664	WT	KO2	OK	18.4803	28.0048	0.599686	2.59964	5e-05	0.000490444	yes
IL18	IL18	IL18	chr11:112143250-112164117	WT	KO2	OK	46.834	70.9279	0.598795	2.55552	5e-05	0.000490444	yes
PRSS3	PRSS3	PRSS3	chr9:33750465-33799231	WT	KO2	OK	17.8988	27.1017	0.598525	2.20312	0.00015	0.0013092	yes
TMEM97	TMEM97	TMEM97	chr17:28319094-28335489	WT	KO2	OK	36.83	55.7572	0.598276	2.13011	0.0002	0.00168549	yes
TBC1D9	TBC1D9	TBC1D9	chr4:140620781-140756317	WT	KO2	OK	4.68064	7.082	0.59745	2.41413	5e-05	0.000490444	yes
GATA6	GATA6	GATA6	chr18:22169436-22202528	WT	KO2	OK	2.54519	3.84854	0.596538	2.1649	0.0001	0.000919048	yes
SORT1	SORT1	SORT1	chr1:109309565-109397945	WT	KO2	OK	6.2243	9.39784	0.594417	2.54217	5e-05	0.000490444	yes
EXOC6	EXOC6	EXOC6	chr10:92826830-93059494	WT	KO2	OK	9.38361	14.164	0.59401	2.48743	5e-05	0.000490444	yes
MGMT	MGMT	MGMT	chr10:129467183-129767620	WT	KO2	OK	3.69702	5.57837	0.593481	1.89523	0.0018	0.0112269	yes
NRCAM	NRCAM	NRCAM	chr7:108147625-108456397	WT	KO2	OK	17.273	26.0496	0.592743	2.56763	5e-05	0.000490444	yes
RASEF	RASEF	RASEF	chr9:82979584-83063128	WT	KO2	OK	15.7653	23.7566	0.591574	2.56398	5e-05	0.000490444	yes
FHL1	FHL1	FHL1	chrX:136146701-136211359	WT	KO2	OK	16.0894	24.2386	0.591192	2.46875	5e-05	0.000490444	yes
MSMO1	MSMO1	MSMO1	chr4:165327665-165343162	WT	KO2	OK	61.5441	92.7074	0.591064	2.51667	5e-05	0.000490444	yes
CTSF	CTSF	CTSF	chr11:66563463-66568576	WT	KO2	OK	19.202	28.9211	0.590869	2.48433	5e-05	0.000490444	yes
RASGRP1	RASGRP1	RASGRP1	chr15:38488097-38564806	WT	KO2	OK	0.446669	0.672693	0.590743	1.55735	0.00695	0.0350777	yes
ZNF675	ZNF675	ZNF675	chr19:23652905-23687215	WT	KO2	OK	1.38215	2.08147	0.590689	1.72279	0.00315	0.0180983	yes
CCDC68	CCDC68	CCDC68	chr18:54901508-54959508	WT	KO2	OK	7.81323	11.7652	0.590532	2.42414	5e-05	0.000490444	yes
HTRA1	HTRA1	HTRA1	chr10:122461524-122514908	WT	KO2	OK	21.1314	31.8152	0.590329	2.50073	5e-05	0.000490444	yes
ELL2	ELL2	ELL2	chr5:95885097-96631085	WT	KO2	OK	6.85692	10.3192	0.589694	2.47484	5e-05	0.000490444	yes
GPR37	GPR37	GPR37	chr7:124745600-124766025	WT	KO2	OK	3.20021	4.81535	0.589476	2.20602	0.0002	0.00168549	yes
SMPDL3A	SMPDL3A	SMPDL3A	chr6:122789048-122809719	WT	KO2	OK	3.15683	4.74863	0.589036	1.93266	0.00095	0.00648299	yes
LIPA	LIPA	LIPA	chr10:89213568-89252039	WT	KO2	OK	76.0694	114.421	0.588969	2.56755	5e-05	0.000490444	yes
RGMB	RGMB	RGMB	chr5:98769294-98796494	WT	KO2	OK	3.45594	5.19468	0.587955	2.25195	0.00015	0.0013092	yes
LRRC8D	LRRC8D	LRRC8D	chr1:89821013-89936430	WT	KO2	OK	13.8743	20.8517	0.587754	2.51536	5e-05	0.000490444	yes
NRP1	NRP1	NRP1	chr10:33177490-33334905	WT	KO2	OK	62.3224	93.6017	0.586785	2.52821	5e-05	0.000490444	yes
AKAP7	AKAP7	AKAP7	chr6:131135685-131283535	WT	KO2	OK	2.04849	3.07598	0.586486	1.95215	0.0004	0.00310726	yes
FOXN3	FOXN3	FOXN3	chr14:89156171-89619150	WT	KO2	OK	1.81301	2.72177	0.586159	2.16853	5e-05	0.000490444	yes
CD9	CD9	CD9	chr12:6200315-6238271	WT	KO2	OK	154.573	232.039	0.586076	2.58495	5e-05	0.000490444	yes
OSBP2	OSBP2	OSBP2	chr22:30693781-30907824	WT	KO2	OK	6.33713	9.51125	0.585806	2.3277	5e-05	0.000490444	yes
HK1	HK1	HK1	chr10:69269999-69401881	WT	KO2	OK	42.3502	63.5415	0.585332	2.60107	5e-05	0.000490444	yes
PNRC2	PNRC2	PNRC2	chr1:23959810-23963459	WT	KO2	OK	24.1212	36.1843	0.585062	2.50593	5e-05	0.000490444	yes

## Sheet: KO1 and KO2 UP
gene		List of genes that are upregulated in both KO1 and KO2 when compared to parental A549 cells (FC ≥ 1,5; q ≤ 0,5)
POP3
TLR4
WNT5A
TRIB2
CD74
SPARC
CDH6
PTPRE
PID1
GRAMD3
IL7R
GLIPR1
CFI
CIITA
FSTL4
EDIL3
CPE
PDCD1LG2
GBP1P1
CNIH3
NR1H4
GBP1
EFEMP1
FHOD3
FAM110B
PLA1A
LYPD1
ANXA8
EHF
C3
TXNIP
TNFSF14
MOB3B
CDH2
COL4A6
TMEM178A
BMPER
NCKAP5
PITX2
ALX4
SLC16A2
DPYSL3
PTPRB
EPHA4
KIAA1462
ZNF841
KRT85
PPP1R14D
DNER
GBP2
STK33
VDR
NEURL1B
SLC9A9
COL4A5
ADRB2
NTNG2
RBMS3
RASSF10
CPVL
LSAMP
CCDC71L
C1R
ZNF548
LINC01239
EVA1A
SIDT1
GMPR
ZNF608
CXXC4
NREP
MYBL1
LOX
ZC4H2
CCBE1
SALL1
CFB
CASP1
CLDN2
ATP8B4
GBP4
ACSL5
LHFP
PTX3
RFTN1
GLIPR2
NFE2
TNC
C10orf11
KCNJ2
IFI44L
ARRDC3
C1S
CACNA1I
GBP3
ARID5B
UG0898H09
KCNE4
DBP
ZNF853
WLS
MOXD1
ADAM12
TCEA2
AK5
FRMD5
TMEM158
C1orf21
ANKRD22
IFITM1
TNFSF10
PRICKLE1
PLEKHS1
TWIST1
HAS2
CHST2
IFI16
FAM198B
LOC400706
FHDC1
SLC27A2
RNF125
SDK1
RPS6KA5
GBP7
ITGB2
CCL26
HIVEP3
ANXA8L1
MIR100HG
PDZK1IP1
SEMA3F
GIMAP2
TCF4
LOC100288152
CLTCL1
ZBP1
ANPEP
DNAJC15
LIMA1
SULF2
PARP8
NNMT
TNS4
HS3ST3B1
EDNRA
IDO1
SAMD9L
CDH1
ICA1
EEF1A2
HLX
LIFR
COL5A1
CP
ENOX1
TRIM22
FAM65B
SCML1
DENND2A
SMARCD3
C2orf66
FCMR
FBN2
TXK
ZDHHC14
ST5
IFI44
PDP1
DIO2
UBA7
AUTS2
CLEC2B
PRSS27
CPA4
RTP4
CTSS
RNF212
SEPT4
MAP2K6
PADI1
TMEM47
SOX4
RN7SK
RAB27A
LOC101927809
LIMCH1
PTPRG
SGCD
NALCN
TMEM154
RET
ELL2
CASP4
ALPK2
FHIT
MAP2
MMAA
ADGRF4
IGFBP7
SCN1B
BTN3A3
ZNF862
MT2A
MUC1
SOX2
CD24
FUT8
RGMB
SAMHD1
DKK3
UST
STMN1
ZBED5
MAML2
CARD16
NHS
LIPG
NFIX
PPP2R3A
AOX1
RNF182
ZNF675
PRKY
CDC42EP3
CCL17
KATNAL2
THEMIS2
AKAP2
DPP4
INPP4B
TNFSF13B
ZNF708
CCT6B
RASGRP1
IFITM2
STRIP2
NRP1
CAPN3
SUSD1
MDGA1
RGS2
LMO2
BANK1
LINC00525
LAP3
MORC4
TBX3
FEM1C
EIF4E3
ENC1
PDE8B
PTGES
DNAJC12
TPCN1
BTC
MX2
SMAD1
LOC729970
SIAE
TMEM229B
ZNF92
GPCPD1
TENM3
C3orf58
CTSF
CDCP1
C15orf48
C9orf40
LTBP2
IFNGR1
CASC15
PI4K2B
ASS1
SLCO1B1
LOXL2
PEX11B
INSIG1
ZMYND15
TLR3
PNRC2
SIPA1L1
SLC25A29
SSBP3
DPYD
FBXO4
TNFRSF19
CYP4V2
PXMP2
B2M
TLE4
LINC01355
ZNF430
PLEKHA2
CXCL2
NT5C3A
VWA5A
MMP2
LINC00641
MT1X
IL1RAP
FN1
SH3BGRL
CNN3
ASAP3
RNF138
PRKCH
XAF1
EGLN1
TUBB3
FLJ32255
ACBD7
RAB27B
SPRY1
SLC2A12
BACE1
IFI30
C1QTNF1
TRAFD1
GATA6
SRD5A3
C12orf76
SPTB
MALAT1
TM4SF18
HTR7P1
TGM2
KIAA1614
STC1
SNX18
SLC39A8
FAM3C
STARD4
CXCL8
IPW
AXIN2
TP53INP1
ASPHD2
PLAT
ASAH2B
CNTNAP3P2
UHMK1
ZFY
EFNB2
PTTG1IP
IFIT1
TCTN1
HPGD
CXCL5
SPTSSA
UGCG
HIF1A
S100A13
SERINC5
HIST2H2BE
TUBA1A
TRAM1
CLEC2D
AKAP7
GAREM1
SLC8A2
PLOD2
NCR3LG1
IGFBP3
TNFRSF21
CD68
FOXN3
MALT1
TNRC6C
TGFBR2
BRIP1
TMSB4X
MCUB
CD70
ATP8B1
RNF145
BACE2
DAAM1
NFIA
MAST4
CEACAM1
TNFSF9
LGALS3BP
ACP2
GOLGA8B
CD38
EEA1
CADM1
KITLG
NNT
RPS4Y1
MGMT
PLEKHF2
IL33
IMMP2L
C4BPA
PCMTD2
GLCCI1
RRAGD
TNFRSF1B
FAP
SBK1
SLC2A8
SAA2
SPIN2B
CBX3P2
BCL2L15
LOC90768
BEGAIN
LYRM1
MTHFD2L
CREG2
ANTXR2
TUSC1
NPBWR1
GATA2
LRRC37A3
MYO16-AS1
SOD2
ERMAP
ZNF474
IQCK
DDO
MYL5
XKR9
SLCO1B7
TMSB4Y
LINC01508
CLUHP3
CERS1
CH17-360D5.1
C10orf107
LOC105377763
PALMD
HLA-C
IGFL4
FANK1
LINC00511
PGAM2
APOBEC3G
PAPPA-AS1
BCL2L14
RBMXL1
ISLR
WNT4
EN2
